# Supplementary material for: Effects of Lignin-Diverted Reductant with Polyphenol Oxidases on Cellulose Degradation by Wild and Mutant Types of Lytic Polysaccharide Monooxygenase
Source: MDPI journal article supplement (doi:10.3390/cimb46040230), 2024-04-21

# Effects of Lignin-Diverted Reductant with Polyphenol Oxidases on Cellulose Degradation by Wild and Mutant Types of Lytic Polysaccharide Monooxygenase

Kai Li, Yuan Wang, Xiao Guo and Bo Wang \*

College of Chemical and Biological Engineering, Shandong University of Science and Technology, Qingdao 266590, China

\* Correspondence: wb@sdust.edu.cn

**Table S1** Summary of pH-temperature optima, parameter estimates and model evaluation of respond surface methods (RSM) calculated by a quadratic regression model by two-factors and three-levels of central composite design (CCD). The quadratic equation of the models is  $\text{absorbance} = \text{intercept} + \beta_1 T + \beta_2 T^2 + \beta_3 \text{pH} + \beta_4 \text{pH}^2 + \text{pH} \cdot T$ , and the parameters of equation ( $\beta$ -values) are shown above. The model evaluation of  $R^2$  exhibits the correlation between fitting model and results. The  $p$ -value is used for representing the lack of fit, where  $p < 0.05$  means a significant lack of fit. The *italic* value represents an insignificant ( $p > 0.05$ ) factor within the model.

| Name       | pH   | Temperature (°C) | Parameter Estimates |           |                |                  |                 |                  | Evaluation     |             |
|------------|------|------------------|---------------------|-----------|----------------|------------------|-----------------|------------------|----------------|-------------|
|            |      |                  | Intercept           | T         | T <sup>2</sup> | pH               | pH <sup>2</sup> | pH*T             | R <sup>2</sup> | Lack of Fit |
| Laccase    | 5.19 | 54               | 0.005907            | 0.0010681 | -0.001164      | 0.0003911        | -0.001272       | 0.0007818        | 0.9505         | <0.0001     |
| Tyrosinase | 7.01 | 35               | 0.1014321           | 0.009775  | -0.014264      | <i>-0.000575</i> | -0.022564       | <i>0.0027875</i> | 0.863          | 0.0325      |

**Table S2** Summary of experimental design matrix featuring coded variables (pH and temperature), independent variables (pH and temperature) and responses (laccase and tyrosinase activities) in relation to RSM.

| Run<br>Order | Coded Variables |             | Independent Variables |                             | Laccase Activity ( $\Delta$ Abs/min) |           | Independent Variables |                             | Tyrosinase Activity ( $\Delta$ Abs) |           |
|--------------|-----------------|-------------|-----------------------|-----------------------------|--------------------------------------|-----------|-----------------------|-----------------------------|-------------------------------------|-----------|
|              | pH              | Temperature | pH                    | Temperature ( $^{\circ}$ C) | Experimental                         | Predicted | pH                    | Temperature ( $^{\circ}$ C) | Experimental                        | Predicted |
| 1            | -1              | -1          | 3.2                   | 30                          | 0.002945                             | 0.002794  | 5.5                   | 15                          | 0.0495                              | 0.0582    |
| 2            | -1              | -1          | 3.2                   | 30                          | 0.003115                             | 0.002794  | 5.5                   | 15                          | 0.0560                              | 0.0582    |
| 3            | 0               | -1          | 4.7                   | 30                          | 0.003466                             | 0.003675  | 7.0                   | 15                          | 0.0781                              | 0.0774    |
| 4            | 0               | -1          | 4.7                   | 30                          | 0.003463                             | 0.003675  | 7.0                   | 15                          | 0.0909                              | 0.0774    |
| 5            | 1               | -1          | 6.2                   | 30                          | 0.002003                             | 0.002012  | 8.5                   | 15                          | 0.0482                              | 0.0515    |
| 6            | 1               | -1          | 6.2                   | 30                          | 0.001969                             | 0.002012  | 8.5                   | 15                          | 0.0515                              | 0.0515    |
| 7            | -1              | 0           | 3.2                   | 45                          | 0.003664                             | 0.004244  | 5.5                   | 30                          | 0.0751                              | 0.0795    |
| 8            | -1              | 0           | 3.2                   | 45                          | 0.003705                             | 0.004244  | 5.5                   | 30                          | 0.0907                              | 0.0795    |
| 9            | 0               | 0           | 4.7                   | 45                          | 0.006147                             | 0.005907  | 7.0                   | 30                          | 0.0964                              | 0.1015    |
| 10           | 0               | 0           | 4.7                   | 45                          | 0.005908                             | 0.005907  | 7.0                   | 30                          | 0.0967                              | 0.1015    |
| 11           | 0               | 0           | 4.7                   | 45                          | 0.006314                             | 0.005907  | 7.0                   | 30                          | 0.1068                              | 0.1015    |
| 12           | 0               | 0           | 4.7                   | 45                          | 0.006445                             | 0.005907  | 7.0                   | 30                          | 0.1077                              | 0.1015    |
| 13           | 1               | 0           | 6.2                   | 45                          | 0.004989                             | 0.005026  | 8.5                   | 30                          | 0.0717                              | 0.0783    |
| 14           | 1               | 0           | 6.2                   | 45                          | 0.004994                             | 0.005026  | 8.5                   | 30                          | 0.0763                              | 0.0783    |
| 15           | -1              | 1           | 3.2                   | 60                          | 0.003740                             | 0.003366  | 5.5                   | 45                          | 0.0710                              | 0.0722    |
| 16           | -1              | 1           | 3.2                   | 60                          | 0.003638                             | 0.003366  | 5.5                   | 45                          | 0.0775                              | 0.0722    |
| 17           | 0               | 1           | 4.7                   | 60                          | 0.005491                             | 0.005811  | 7.0                   | 45                          | 0.0879                              | 0.0970    |
| 18           | 0               | 1           | 4.7                   | 60                          | 0.005365                             | 0.005811  | 7.0                   | 45                          | 0.0900                              | 0.0970    |
| 19           | 1               | 1           | 6.2                   | 60                          | 0.005619                             | 0.005712  | 8.5                   | 45                          | 0.0818                              | 0.0766    |
| 20           | 1               | 1           | 6.2                   | 60                          | 0.005926                             | 0.005712  | 8.5                   | 45                          | 0.0833                              | 0.0766    |

**a**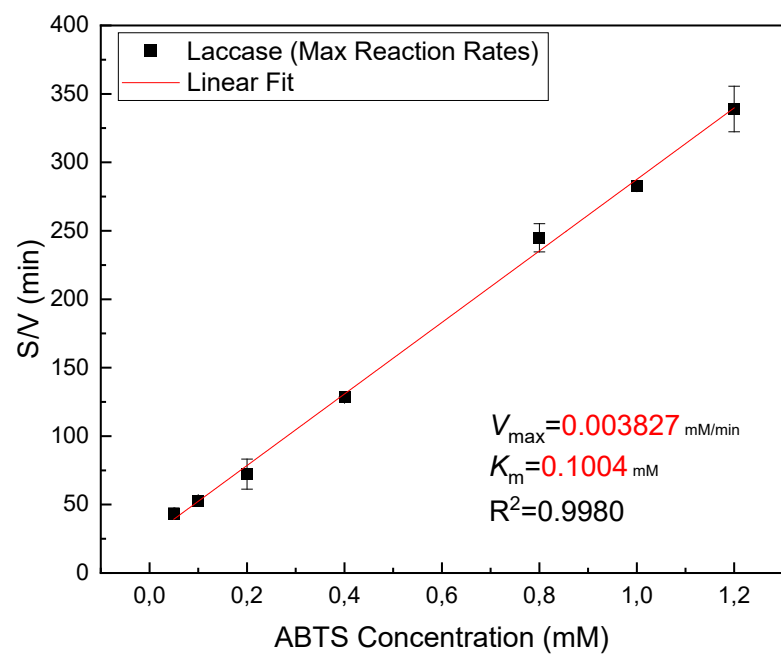**b**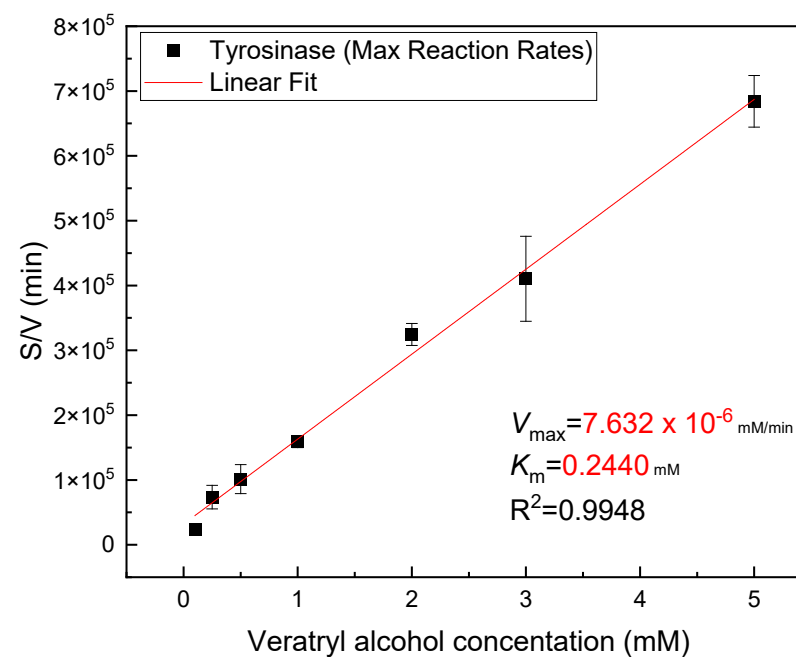

**Figure S1** Kinetic parameters ( $K_m$  and  $V_{\max}$ ) of (a) laccase and (b) tyrosinase. The linear integrate of Hanes-Woolf plot is used for the calculation of kinetic constants.

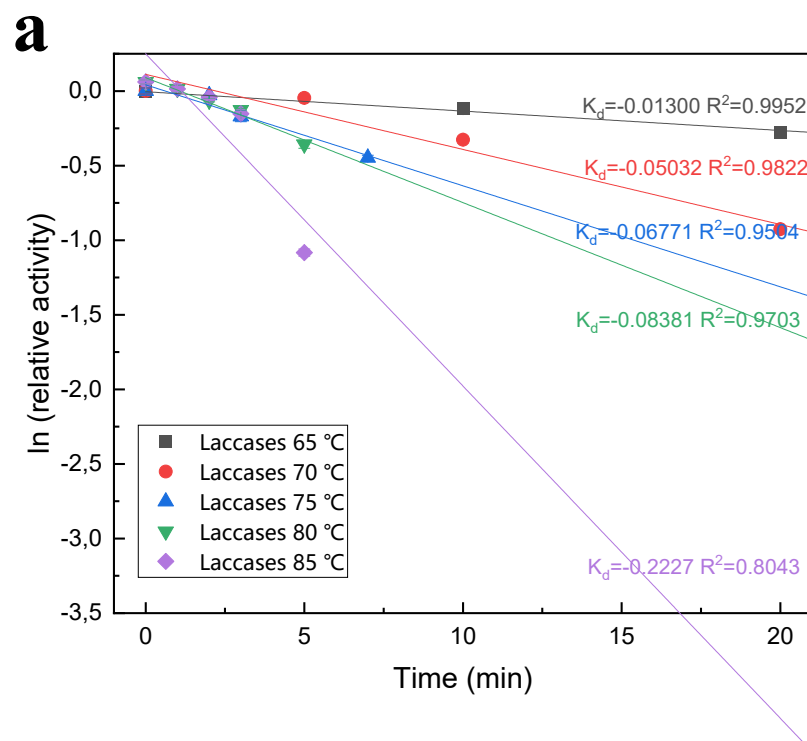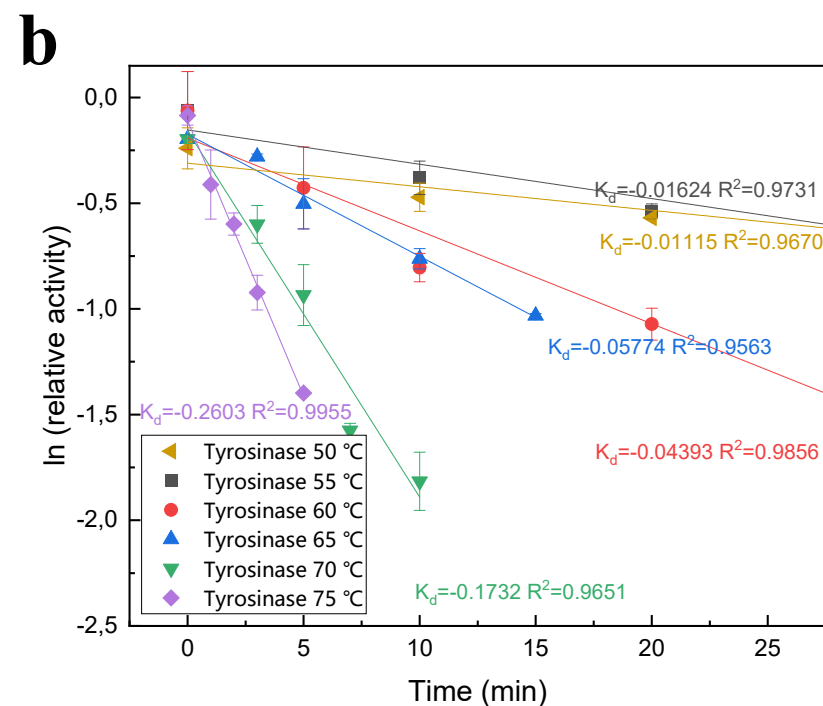

**Figure S2** Thermal stabilities of (a) laccase and (b) tyrosinase. The values of  $K_d$  and  $t_{1/2}$  are calculated by linear fit of plot, which draws using the  $\ln$  (relative activity) as the Y-axis and the time as the X-axis (minutes). The selection of enzymatic reaction time is based on the experiment results in different temperatures.

**Figure S3.** Supplementary figures for LC-MS analysis of products of organosolv lignin after polyphenol oxidases treatment (small lignin-derived phenolic compounds): (a) LK-1 R: reference without polyphenol oxidases, (b) LK-2: the product of organosolv lignin by laccase treatment and (c) LK-3: the product of organosolv lignin by tyrosinase treatment. All the documents for the results of LC-MS analysis are attached.

**Openlynx Report -**

Sample: 642  
File:LK-1 R  
Description:Default file

Vial:1:B,3  
Date:03-Aug-2023

ID:  
Time:12:27:58

Page 1

Printed: Thu Aug 03 15:04:15 2023

**Sample Report:**

Sample 642 Vial 1:B,3 ID File LK-1 R Date 03-Aug-2023 Time 12:27:58 Description Default file

1: MS ES- :TIC

4.7e+006

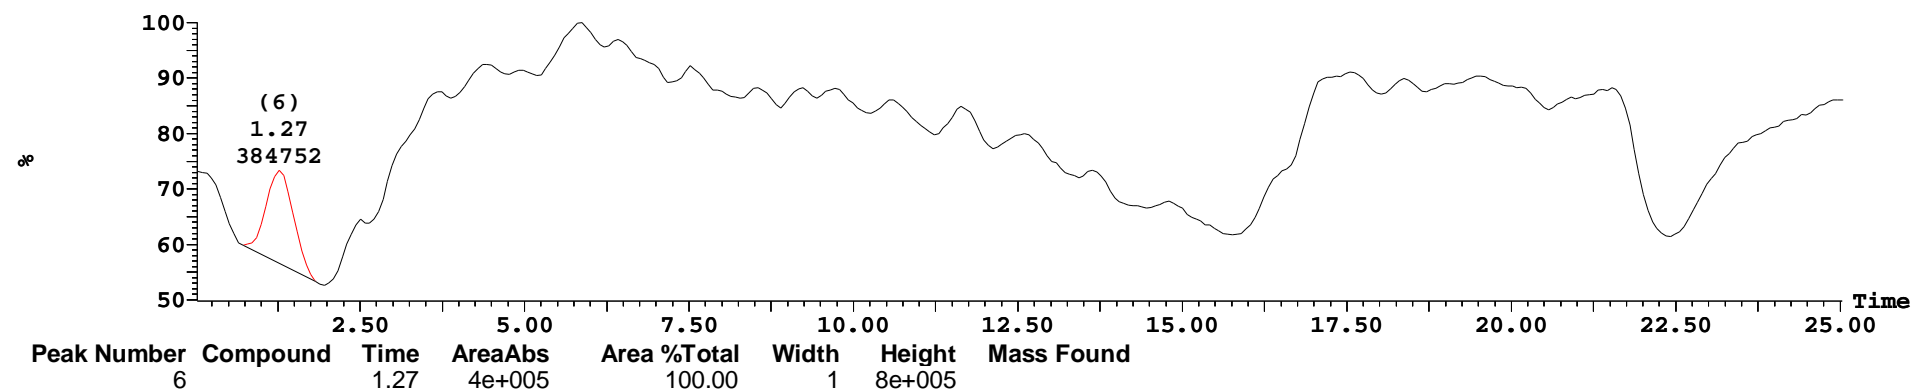

2: MS ES+ :TIC

3.0e+008

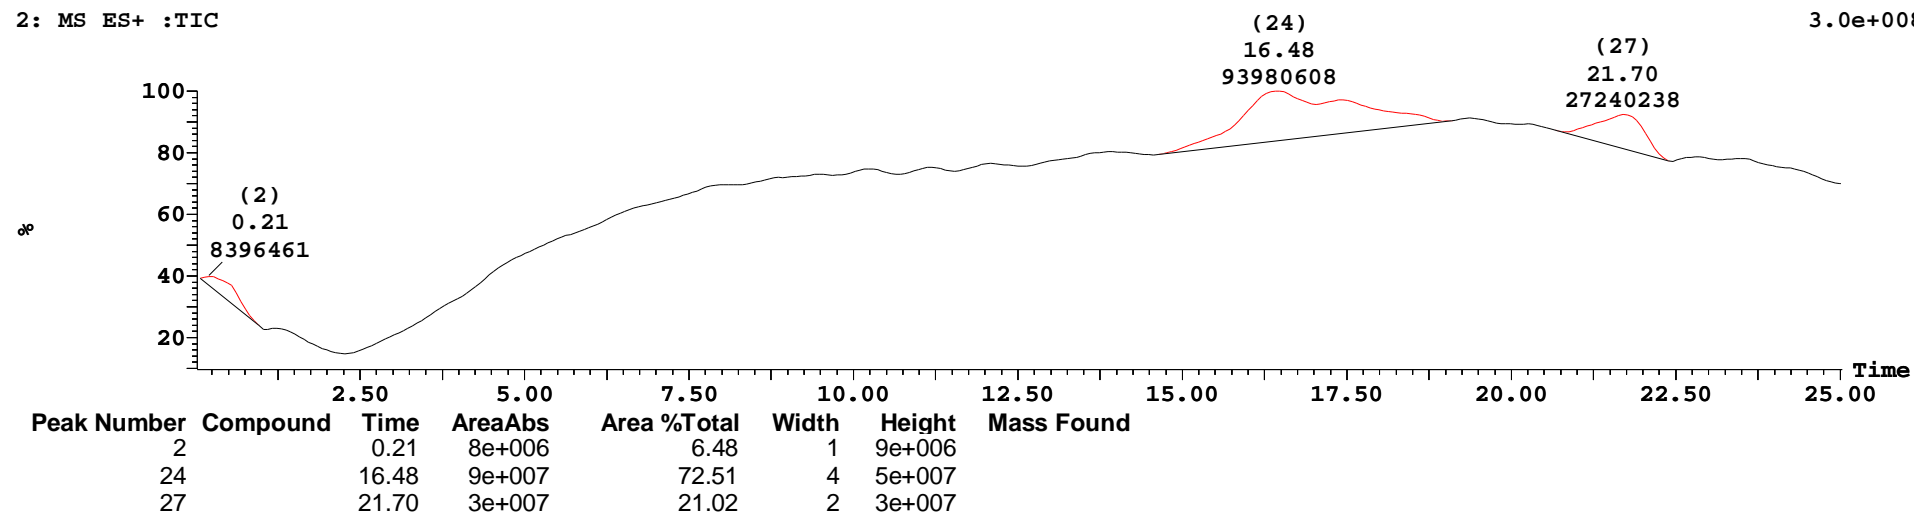

# Openlynx Report -

Sample: 642  
File: LK-1 R  
Description: Default file

Vial: 1:B,3  
Date: 03-Aug-2023

ID:  
Time: 12:27:58

Page 2

Printed: Thu Aug 03 15:04:15 2023

## Sample Report (continued):

3: UV Detector: 214

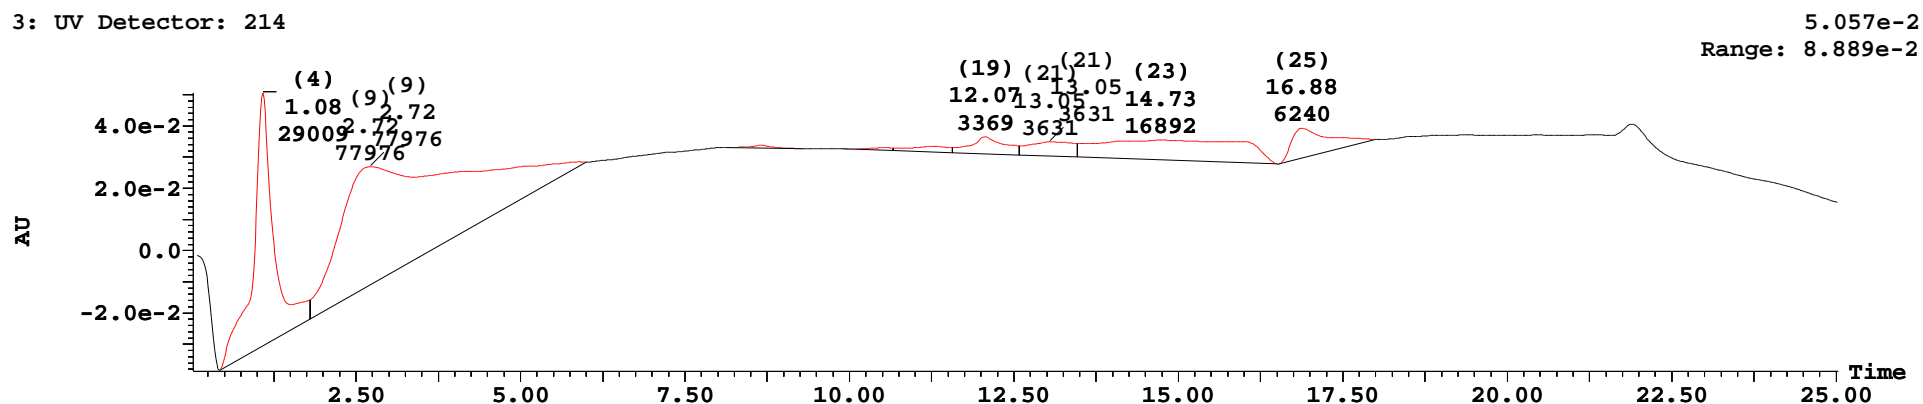

| Peak Number | Compound | Time  | AreaAbs | Area %Total | Width | Height | Mass Found |
|-------------|----------|-------|---------|-------------|-------|--------|------------|
| 4           |          | 1.08  | 3e+004  | 20.86       | 1     | 8e+004 |            |
| 9           |          | 5.90  | 8e+004  | 56.06       | 4     | 1e+003 |            |
| 12          |          | 8.65  | 4e+002  | 0.27        | 1     | 1e+003 |            |
| 15          |          | 10.52 | 3e+002  | 0.25        | 1     | 9e+002 |            |
| 18          |          | 11.27 | 1e+003  | 0.91        | 1     | 2e+003 |            |
| 19          |          | 12.07 | 3e+003  | 2.42        | 1     | 5e+003 |            |
| 21          |          | 13.05 | 4e+003  | 2.61        | 1     | 5e+003 |            |
| 23          |          | 14.73 | 2e+004  | 12.14       | 3     | 6e+003 |            |
| 25          |          | 16.88 | 6e+003  | 4.49        | 1     | 1e+004 |            |

3: UV Detector: 254

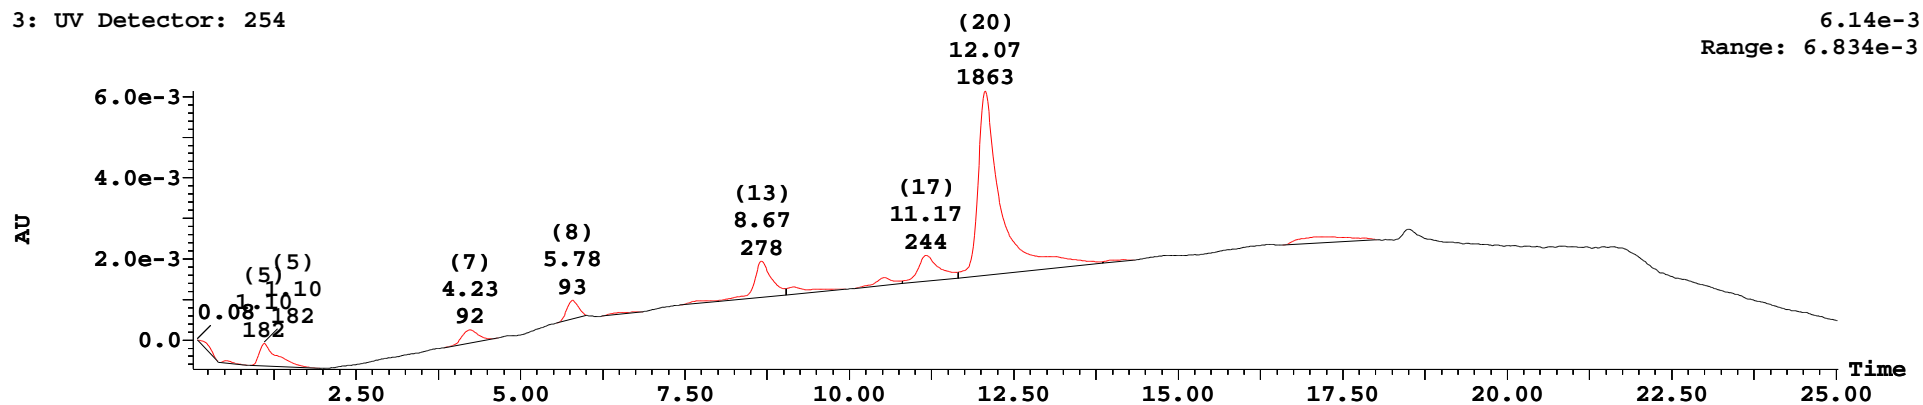

**Openlynx Report -**

Sample: 642  
File:LK-1 R  
Description:Default file

Vial:1:B,3  
Date:03-Aug-2023

ID:  
Time:12:27:58

Page 3

Printed: Thu Aug 03 15:04:15 2023

**Sample Report (continued):**

| Peak Number | Compound | Time  | AreaAbs | Area %Total | Width | Height | Mass Found |
|-------------|----------|-------|---------|-------------|-------|--------|------------|
| 1           |          | 0.08  | 3e+001  | 0.94        | 0     |        |            |
| 3           |          | 0.53  | 1e+001  | 0.35        | 0     | 6e+001 |            |
| 5           |          | 1.10  | 2e+002  | 5.83        | 1     | 6e+002 |            |
| 7           |          | 4.23  | 9e+001  | 2.96        | 1     | 3e+002 |            |
| 8           |          | 5.78  | 9e+001  | 3.00        | 0     | 5e+002 |            |
| 10          |          | 6.85  | 2e+001  | 0.49        | 1     |        |            |
| 11          |          | 7.83  | 2e+001  | 0.71        | 1     | 5e+001 |            |
| 13          |          | 8.67  | 3e+002  | 8.94        | 1     | 9e+002 |            |
| 14          |          | 9.15  | 7e+001  | 2.26        | 1     | 2e+002 |            |
| 16          |          | 10.53 | 6e+001  | 1.99        | 1     | 2e+002 |            |
| 17          |          | 11.17 | 2e+002  | 7.84        | 1     | 6e+002 |            |
| 20          |          | 12.07 | 2e+003  | 59.82       | 2     | 5e+003 |            |
| 22          |          | 14.17 | 2e+001  | 0.57        | 0     | 4e+001 |            |
| 26          |          | 17.28 | 1e+002  | 4.30        | 1     | 1e+002 |            |

| Peak ID | Compound | Time | Mass Found |
|---------|----------|------|------------|
| 1       |          | 0.08 |            |

1: (Time: 0.08)

1:MS ES-  
3.6e+004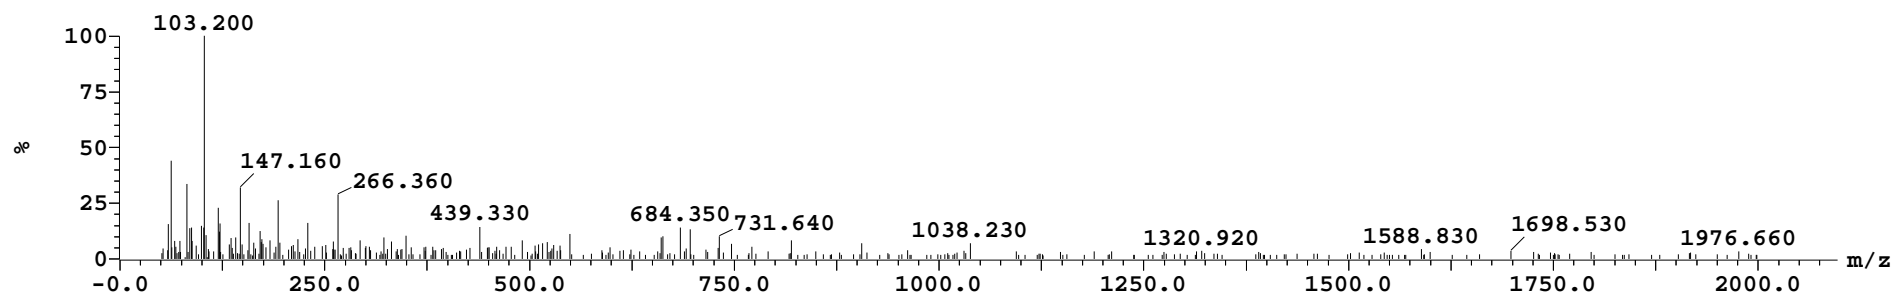



**Openlynx Report -**

Sample: 642  
File:LK-1 R  
Description:Default file

Vial:1:B,3  
Date:03-Aug-2023

ID:  
Time:12:27:58

Page 4

Printed: Thu Aug 03 15:04:15 2023

**Sample Report (continued):**

| Peak ID | Compound | Time | Mass Found |
|---------|----------|------|------------|
|---------|----------|------|------------|

|   |  |      |  |
|---|--|------|--|
| 3 |  | 0.53 |  |
|---|--|------|--|

3: (Time: 0.53)

1:MS ES-  
9.7e+004

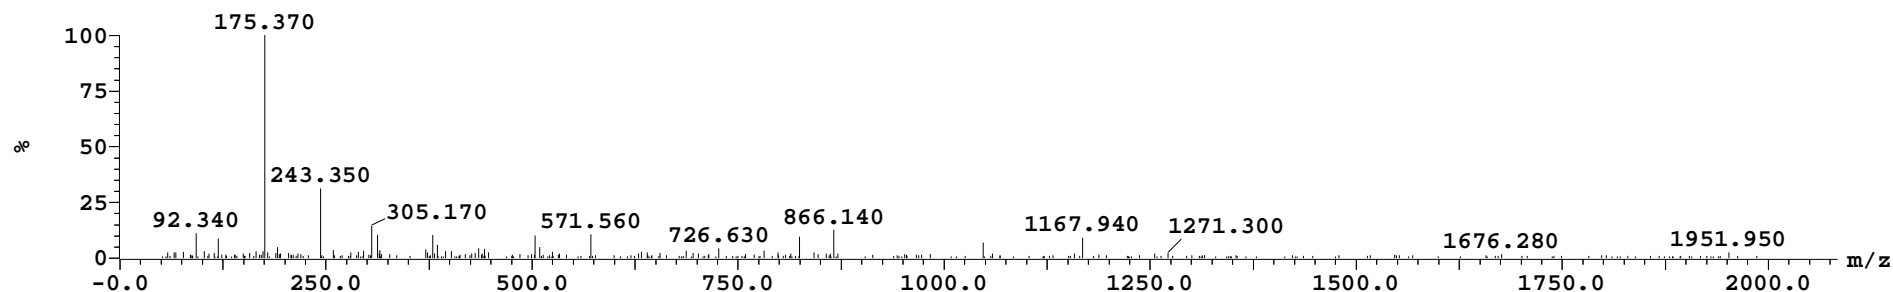

| Peak ID | Compound | Time | Mass Found |
|---------|----------|------|------------|
|---------|----------|------|------------|

|   |  |      |  |
|---|--|------|--|
| 4 |  | 1.08 |  |
|---|--|------|--|

4: (Time: 1.08)

1:MS ES-  
3.7e+005

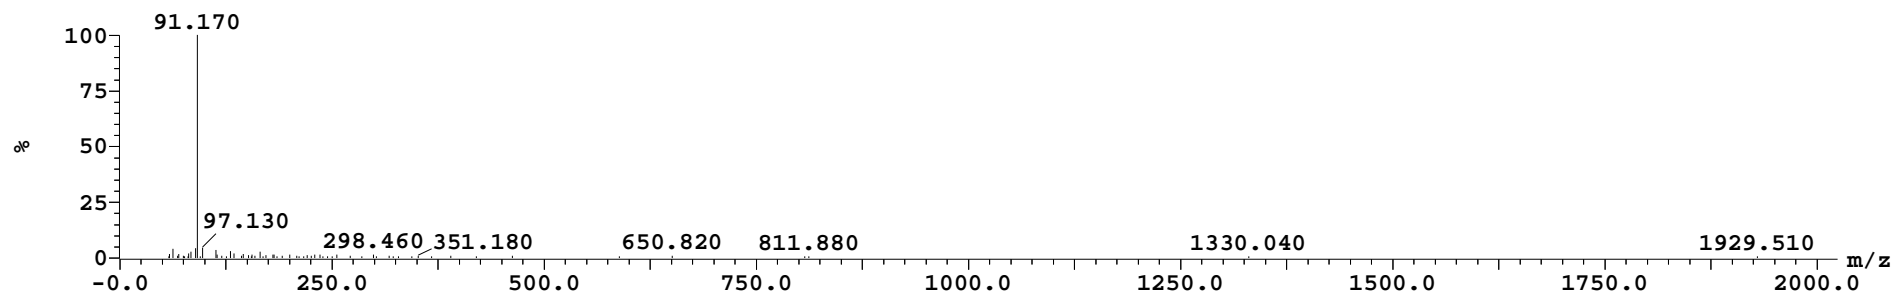

**Openlynx Report -**

Page 5

Sample: 642

Vial:1:B,3

ID:

File:LK-1 R

Date:03-Aug-2023

Time:12:27:58

Description:Default file

Printed: Thu Aug 03 15:04:15 2023

**Sample Report (continued):**

| Peak ID | Compound | Time | Mass Found |
|---------|----------|------|------------|
|---------|----------|------|------------|

5

1.10

5: (Time: 1.10)

1:MS ES-  
2.5e+006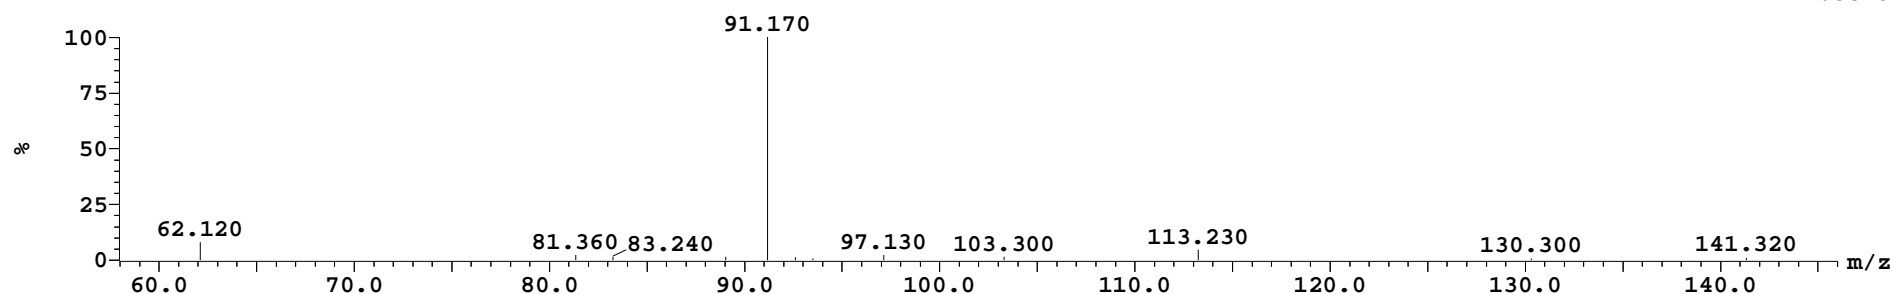

| Peak ID | Compound | Time | Mass Found |
|---------|----------|------|------------|
|---------|----------|------|------------|

6

1.27

6: (Time: 1.27)

1:MS ES-  
3.9e+005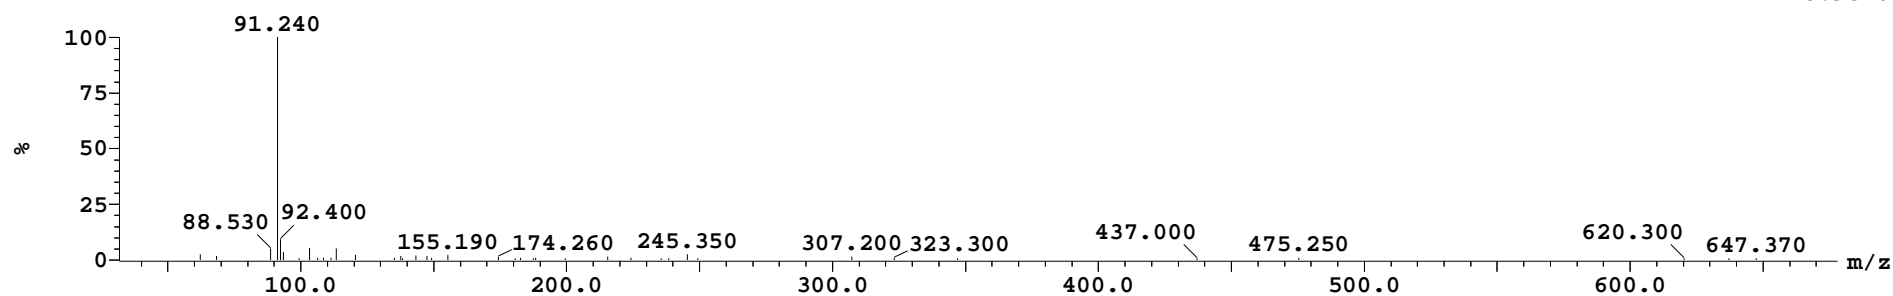

**Openlynx Report -**

Sample: 642  
File:LK-1 R  
Description:Default file

Vial:1:B,3  
Date:03-Aug-2023

ID:  
Time:12:27:58

Page 6

Printed: Thu Aug 03 15:04:15 2023

**Sample Report (continued):**

| Peak ID | Compound | Time | Mass Found |
|---------|----------|------|------------|
|---------|----------|------|------------|

7

4.23

7: (Time: 4.23)

1:MS ES-  
2.1e+004

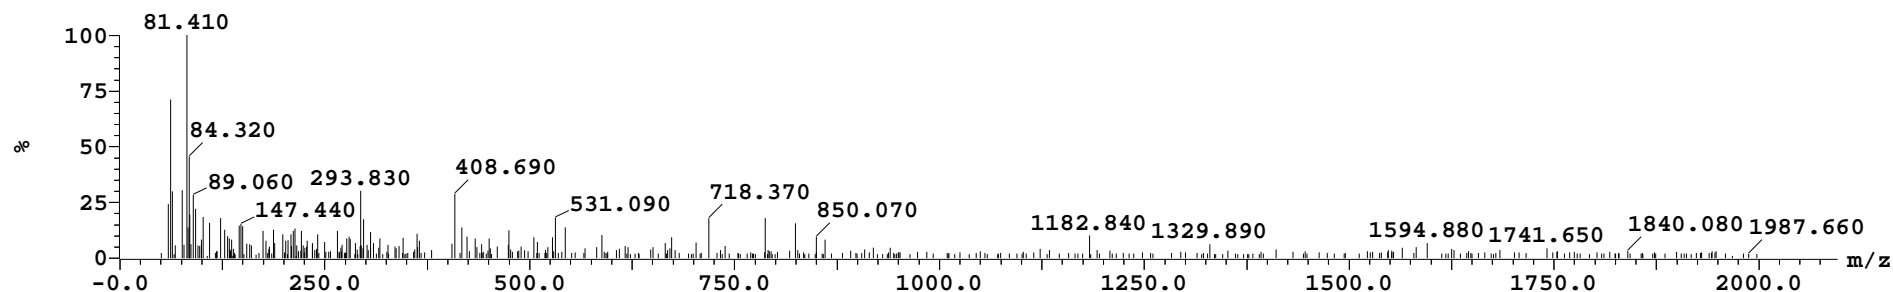

| Peak ID | Compound | Time | Mass Found |
|---------|----------|------|------------|
|---------|----------|------|------------|

8

5.78

8: (Time: 5.78)

1:MS ES-  
2.7e+004

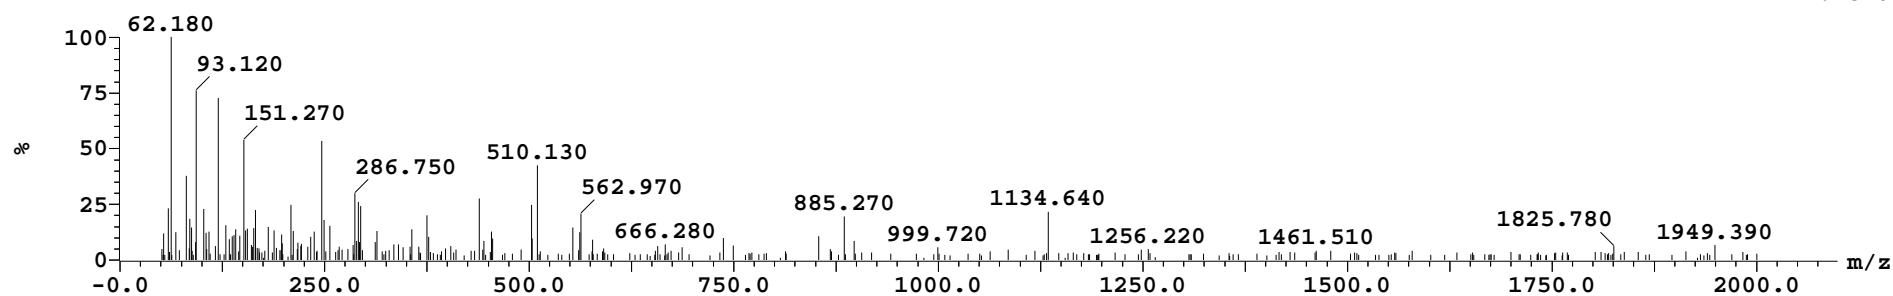

**Openlynx Report -**

Sample: 642  
File:LK-1 R  
Description:Default file

Vial:1:B,3  
Date:03-Aug-2023

ID:  
Time:12:27:58

Page 7

Printed: Thu Aug 03 15:04:15 2023

**Sample Report (continued):**

| Peak ID | Compound | Time | Mass Found |
|---------|----------|------|------------|
|---------|----------|------|------------|

9

5.90

9: (Time: 5.90)

1:MS ES-  
3.3e+006

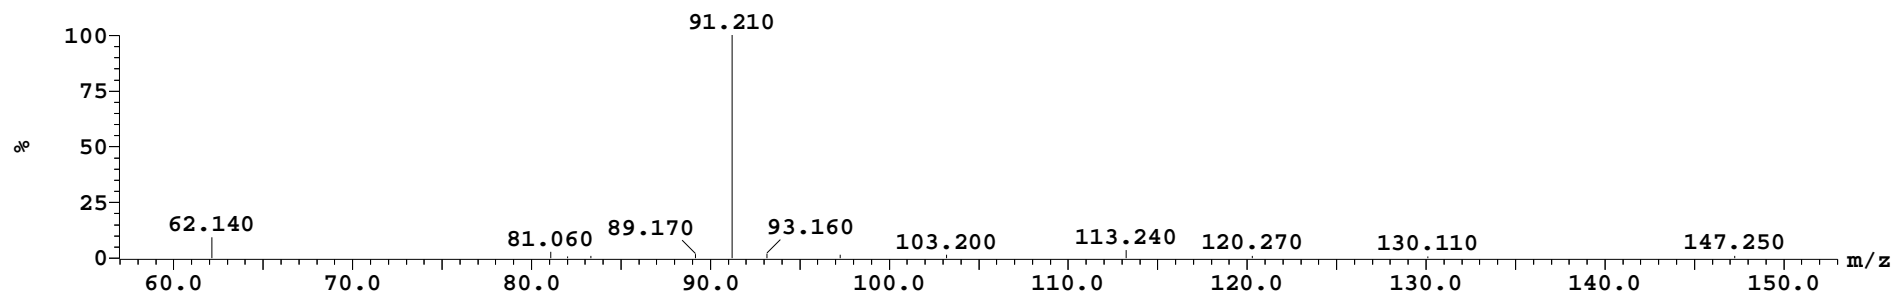

| Peak ID | Compound | Time | Mass Found |
|---------|----------|------|------------|
|---------|----------|------|------------|

10

6.85

10: (Time: 6.85)

1:MS ES-  
4.9e+004

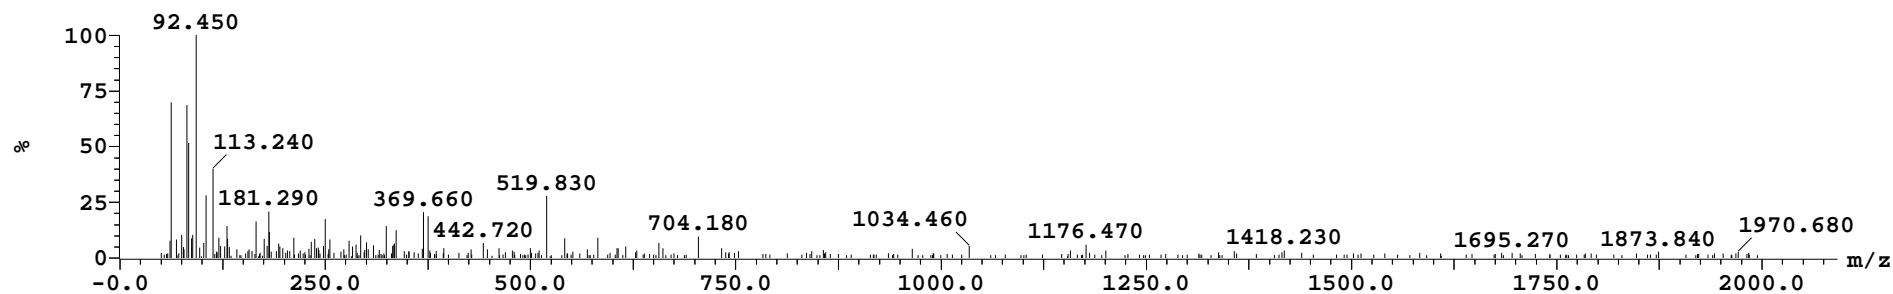

**Openlynx Report -**

Page 8

Sample: 642

Vial:1:B,3

ID:

File:LK-1 R

Date:03-Aug-2023

Time:12:27:58

Description:Default file

Printed: Thu Aug 03 15:04:15 2023

**Sample Report (continued):**

| Peak ID | Compound | Time | Mass Found |
|---------|----------|------|------------|
|---------|----------|------|------------|

|    |  |      |  |
|----|--|------|--|
| 11 |  | 7.83 |  |
|----|--|------|--|

11: (Time: 7.83)

1:MS ES-  
2.7e+006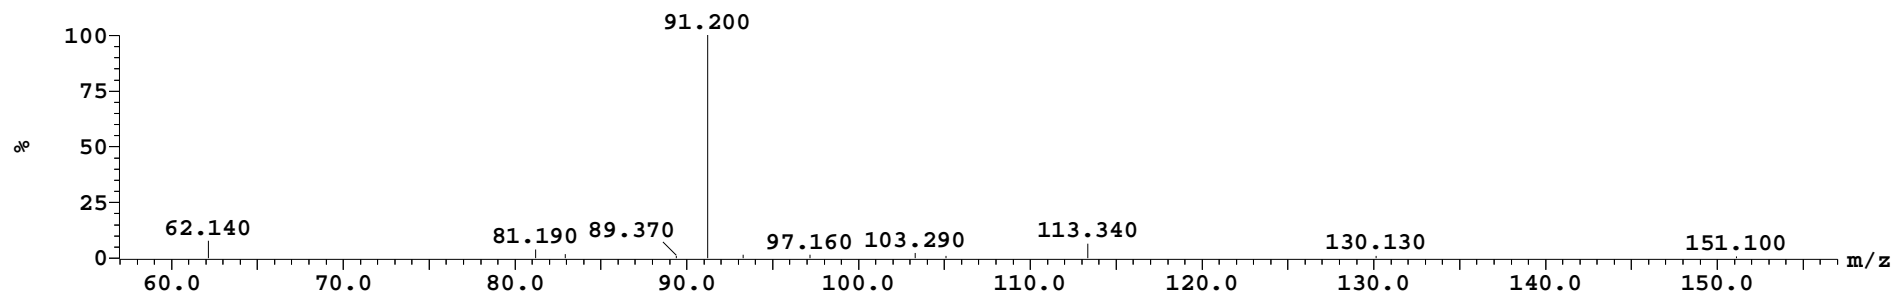

| Peak ID | Compound | Time | Mass Found |
|---------|----------|------|------------|
|---------|----------|------|------------|

|    |  |      |  |
|----|--|------|--|
| 12 |  | 8.65 |  |
|----|--|------|--|

12: (Time: 8.65)

1:MS ES-  
2.7e+006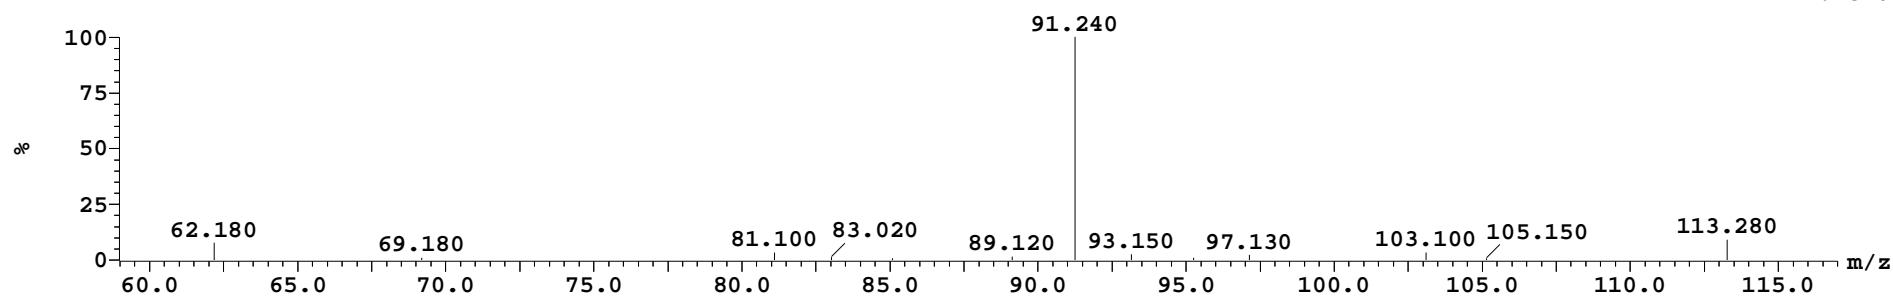

**Openlynx Report -**

Page 9

Sample: 642

Vial:1:B,3

ID:

File:LK-1 R

Date:03-Aug-2023

Time:12:27:58

Description:Default file

Printed: Thu Aug 03 15:04:15 2023

**Sample Report (continued):**

| Peak ID | Compound | Time | Mass Found |
|---------|----------|------|------------|
| 13      |          | 8.67 |            |

13: (Time: 8.67)

1:MS ES-  
1.2e+005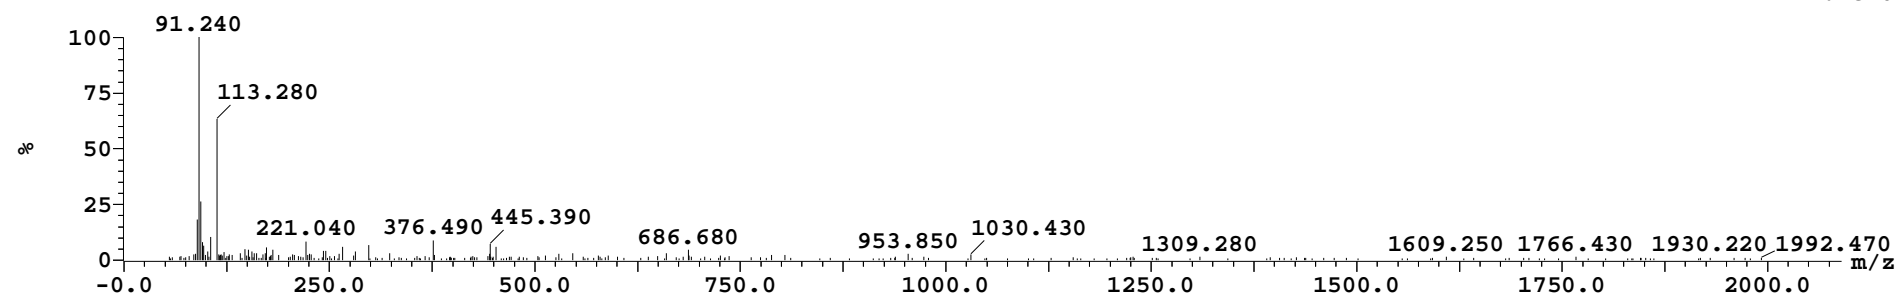

| Peak ID | Compound | Time | Mass Found |
|---------|----------|------|------------|
| 14      |          | 9.15 |            |

14: (Time: 9.15)

1:MS ES-  
1.6e+005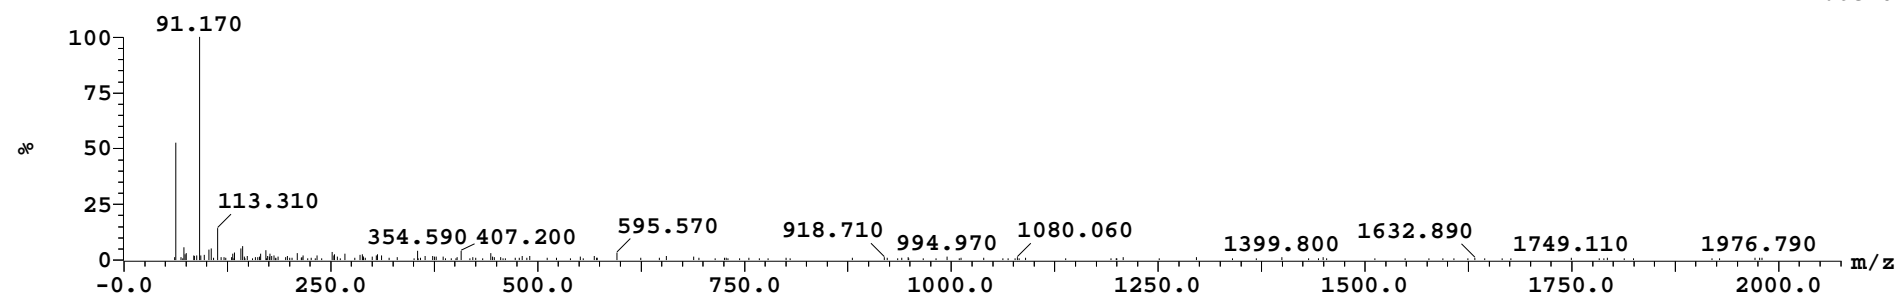

**Openlynx Report -**

Page 10

Sample: 642

Vial:1:B,3

ID:

File:LK-1 R

Date:03-Aug-2023

Time:12:27:58

Description:Default file

Printed: Thu Aug 03 15:04:15 2023

**Sample Report (continued):**

| Peak ID | Compound | Time | Mass Found |
|---------|----------|------|------------|
|---------|----------|------|------------|

|    |  |       |  |
|----|--|-------|--|
| 15 |  | 10.52 |  |
|----|--|-------|--|

15: (Time: 10.52)

1:MS ES-  
4.2e+004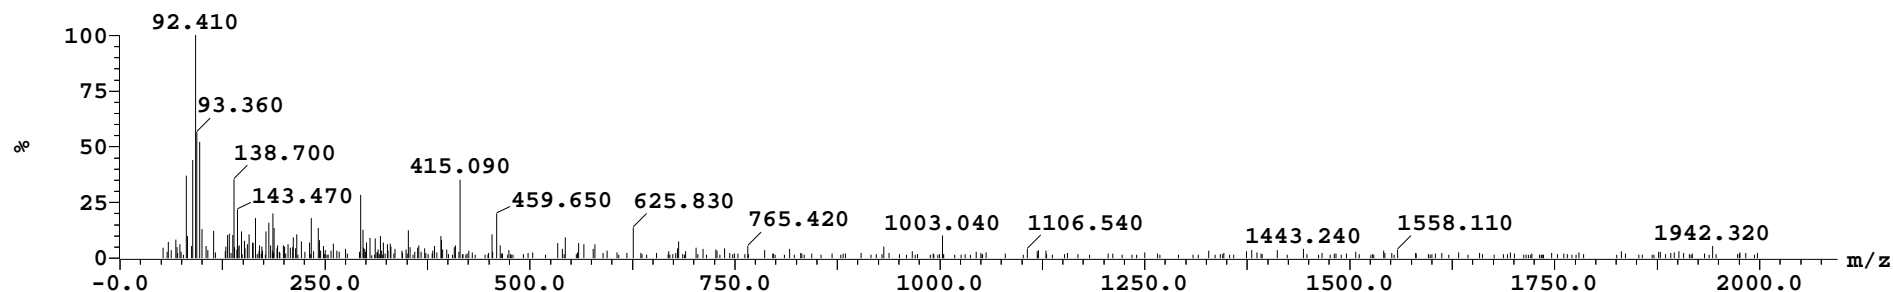

| Peak ID | Compound | Time | Mass Found |
|---------|----------|------|------------|
|---------|----------|------|------------|

|    |  |       |  |
|----|--|-------|--|
| 16 |  | 10.53 |  |
|----|--|-------|--|

16: (Time: 10.53)

1:MS ES-  
6.9e+004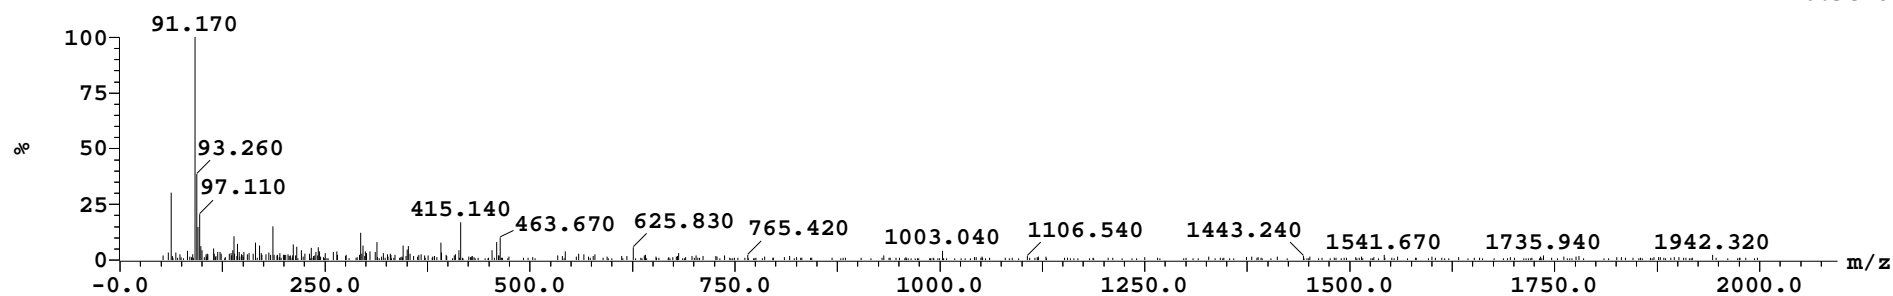

**Openlynx Report -**

Sample: 642  
File:LK-1 R  
Description:Default file

Vial:1:B,3  
Date:03-Aug-2023

ID:  
Time:12:27:58

Page 11

Printed: Thu Aug 03 15:04:15 2023

**Sample Report (continued):**

| Peak ID | Compound | Time | Mass Found |
|---------|----------|------|------------|
|---------|----------|------|------------|

|    |  |       |  |
|----|--|-------|--|
| 17 |  | 11.17 |  |
|----|--|-------|--|

17: (Time: 11.17)

1:MS ES-  
4.0e+004

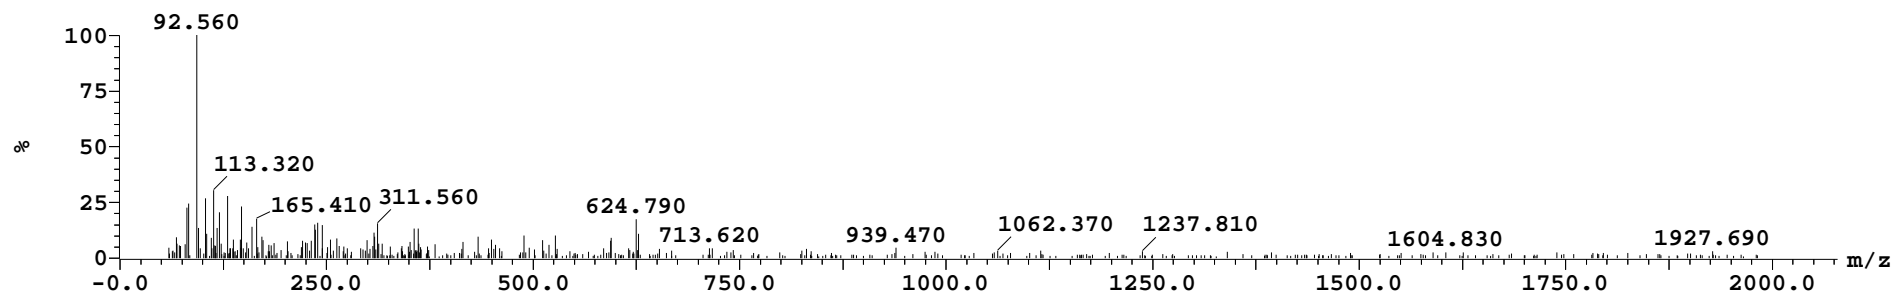

| Peak ID | Compound | Time | Mass Found |
|---------|----------|------|------------|
|---------|----------|------|------------|

|    |  |       |  |
|----|--|-------|--|
| 18 |  | 11.27 |  |
|----|--|-------|--|

18: (Time: 11.27)

1:MS ES-  
2.1e+006

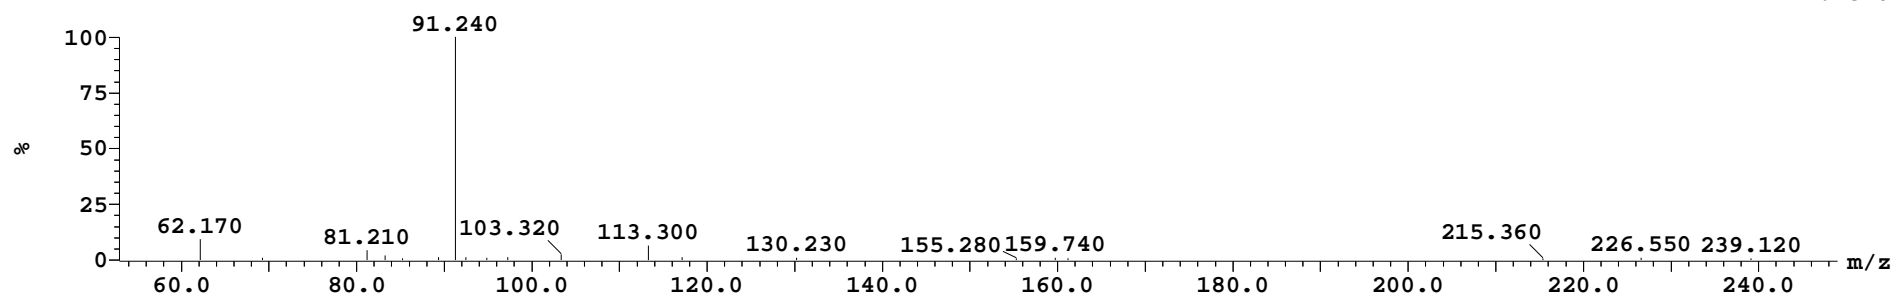



**Openlynx Report -**

Sample: 642  
File:LK-1 R  
Description:Default file

Vial:1:B,3  
Date:03-Aug-2023

ID:  
Time:12:27:58

Page 12

Printed: Thu Aug 03 15:04:15 2023

**Sample Report (continued):**

| Peak ID | Compound | Time | Mass Found |
|---------|----------|------|------------|
|---------|----------|------|------------|

|    |  |       |  |
|----|--|-------|--|
| 19 |  | 12.07 |  |
|----|--|-------|--|

19:(Time: 12.07)

1:MS ES-  
6.5e+004

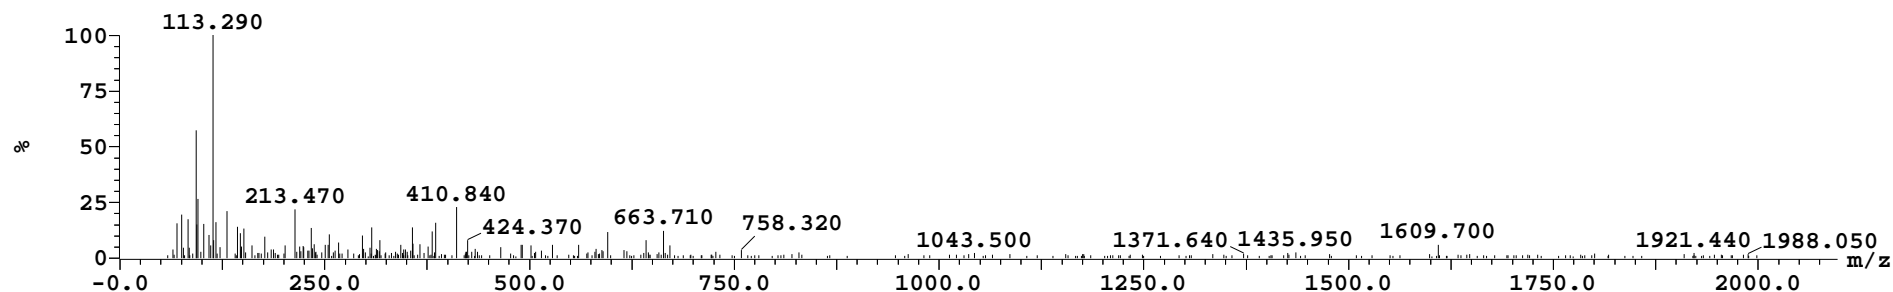

| Peak ID | Compound | Time | Mass Found |
|---------|----------|------|------------|
|---------|----------|------|------------|

|    |  |       |  |
|----|--|-------|--|
| 20 |  | 12.07 |  |
|----|--|-------|--|

20:(Time: 12.07)

1:MS ES-  
6.5e+004

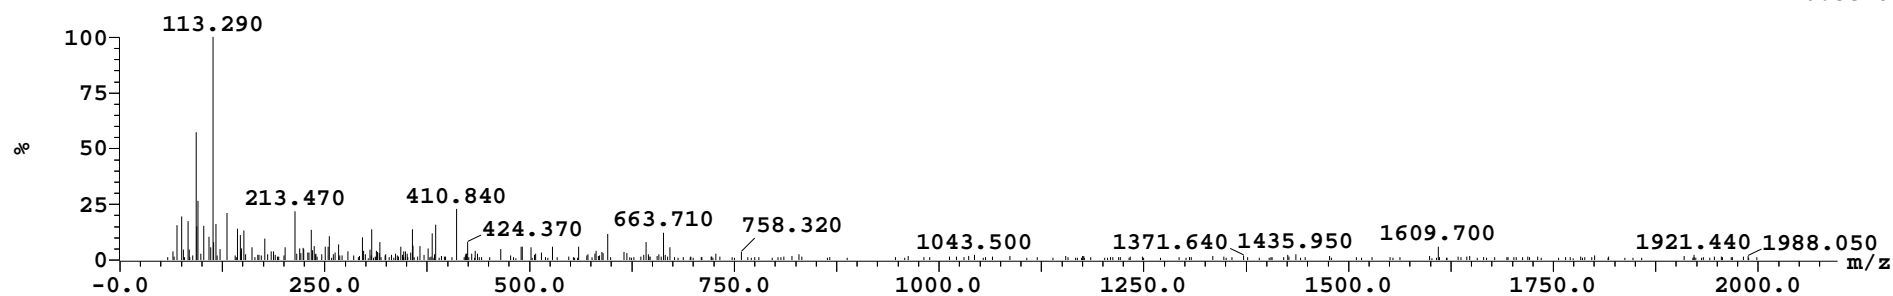

**Openlynx Report -**

Page 13

Sample: 642

Vial:1:B,3

ID:

File:LK-1 R

Date:03-Aug-2023

Time:12:27:58

Description:Default file

Printed: Thu Aug 03 15:04:15 2023

**Sample Report (continued):**

| Peak ID | Compound | Time  | Mass Found |
|---------|----------|-------|------------|
| 21      |          | 13.05 |            |

21: (Time: 13.05)

1:MS ES-  
2.0e+006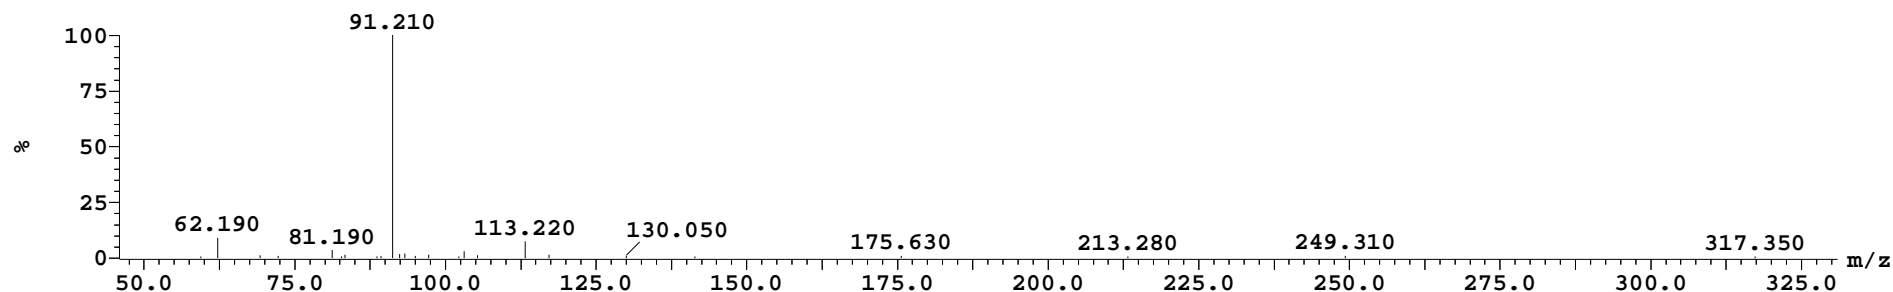

| Peak ID | Compound | Time  | Mass Found |
|---------|----------|-------|------------|
| 22      |          | 14.17 |            |

22: (Time: 14.17)

1:MS ES-  
3.3e+004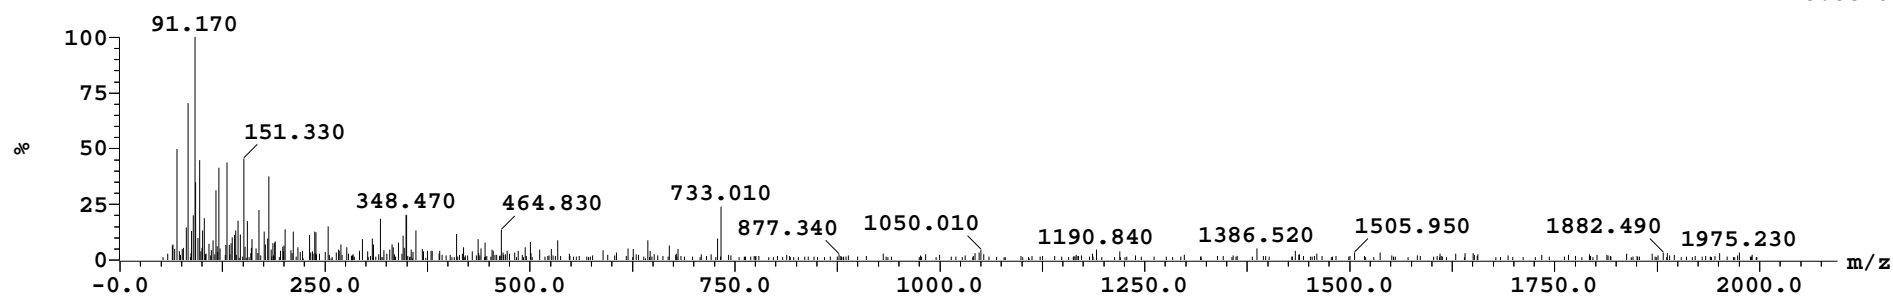

**Openlynx Report -**

Page 14

Sample: 642

Vial:1:B,3

ID:

File:LK-1 R

Date:03-Aug-2023

Time:12:27:58

Description:Default file

Printed: Thu Aug 03 15:04:15 2023

**Sample Report (continued):**

| Peak ID | Compound | Time  | Mass Found |
|---------|----------|-------|------------|
| 23      |          | 14.73 |            |

23:(Time: 14.73)

1:MS ES-  
2.0e+005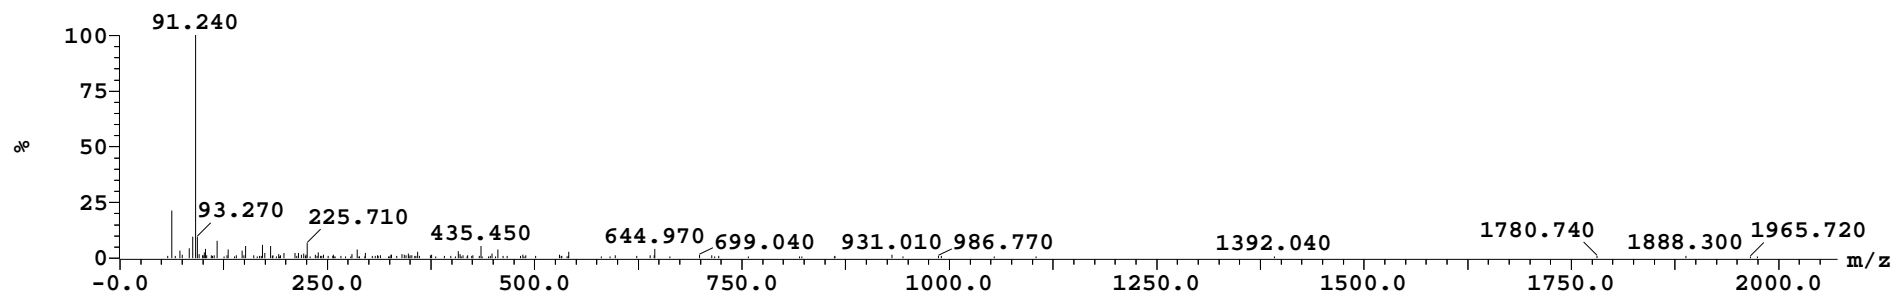

| Peak ID | Compound | Time  | Mass Found |
|---------|----------|-------|------------|
| 25      |          | 16.88 |            |

25:(Time: 16.88)

1:MS ES-  
2.0e+005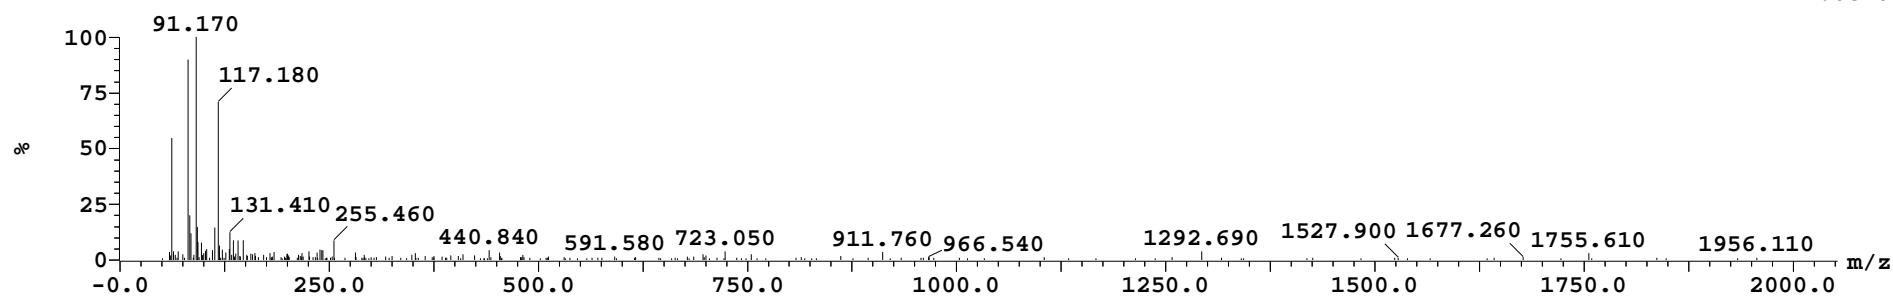

**Openlynx Report -**

Sample: 642  
File:LK-1 R  
Description:Default file

Vial:1:B,3  
Date:03-Aug-2023

ID:  
Time:12:27:58

Page 15

Printed: Thu Aug 03 15:04:15 2023

**Sample Report (continued):**

| Peak ID | Compound | Time  | Mass Found |
|---------|----------|-------|------------|
| 26      |          | 17.28 |            |

26: (Time: 17.28)

1:MS ES-  
6.5e+004

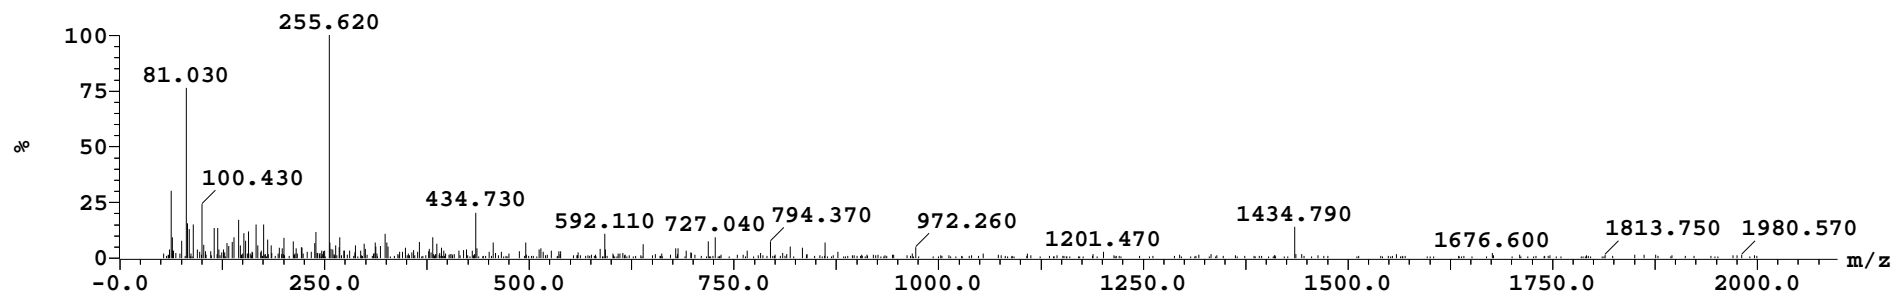

| Peak ID | Compound | Time | Mass Found |
|---------|----------|------|------------|
| 1       |          | 0.08 |            |

1: (Time: 0.08)

2:MS ES+  
1.3e+007

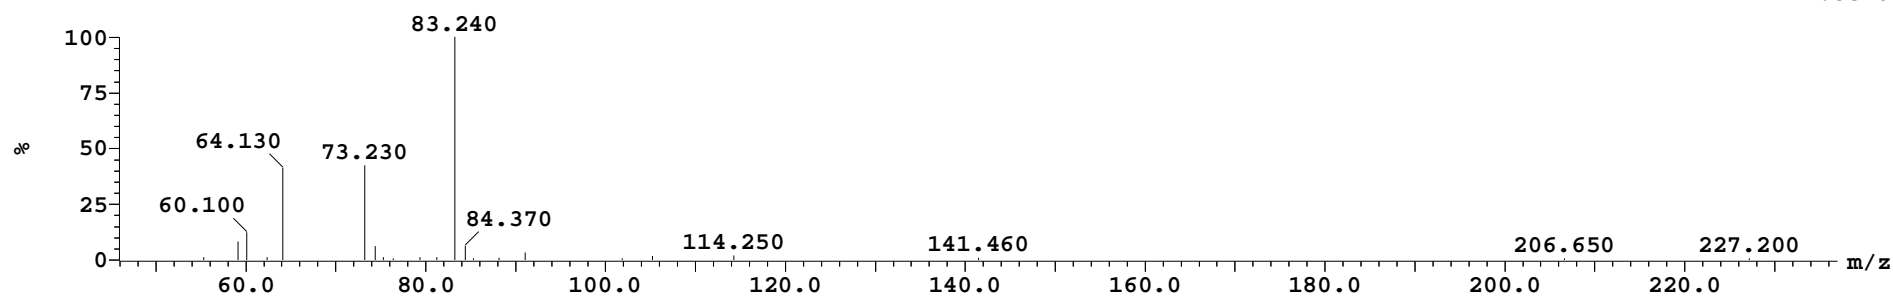

**Openlynx Report -**

Page 16

Sample: 642

Vial:1:B,3

ID:

File:LK-1 R

Date:03-Aug-2023

Time:12:27:58

Description:Default file

Printed: Thu Aug 03 15:04:15 2023

**Sample Report (continued):**

| Peak ID | Compound | Time | Mass Found |
|---------|----------|------|------------|
|---------|----------|------|------------|

|   |  |      |  |
|---|--|------|--|
| 2 |  | 0.21 |  |
|---|--|------|--|

2: (Time: 0.21)

2:MS ES+  
1.9e+007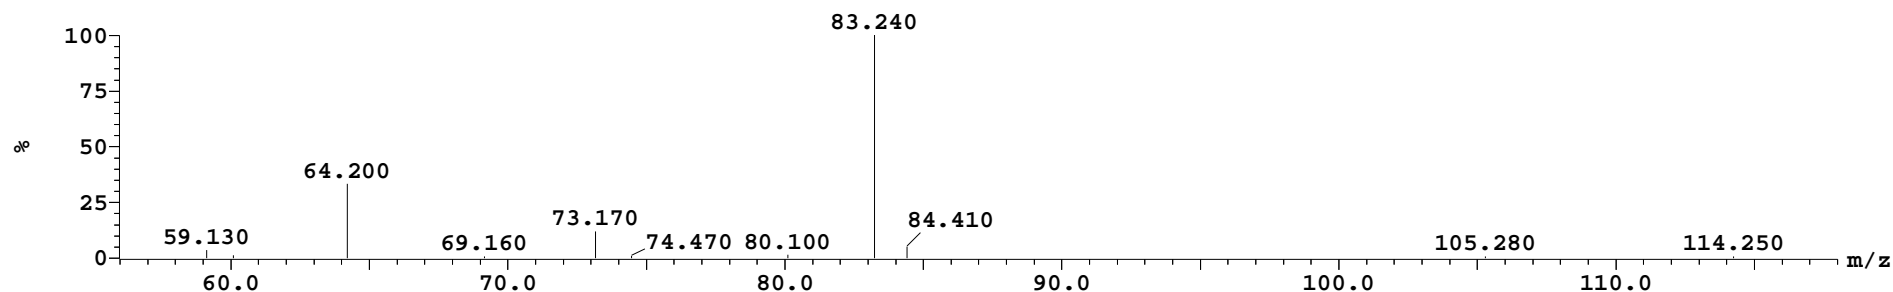

| Peak ID | Compound | Time | Mass Found |
|---------|----------|------|------------|
|---------|----------|------|------------|

|   |  |      |  |
|---|--|------|--|
| 3 |  | 0.53 |  |
|---|--|------|--|

3: (Time: 0.53)

2:MS ES+  
1.8e+007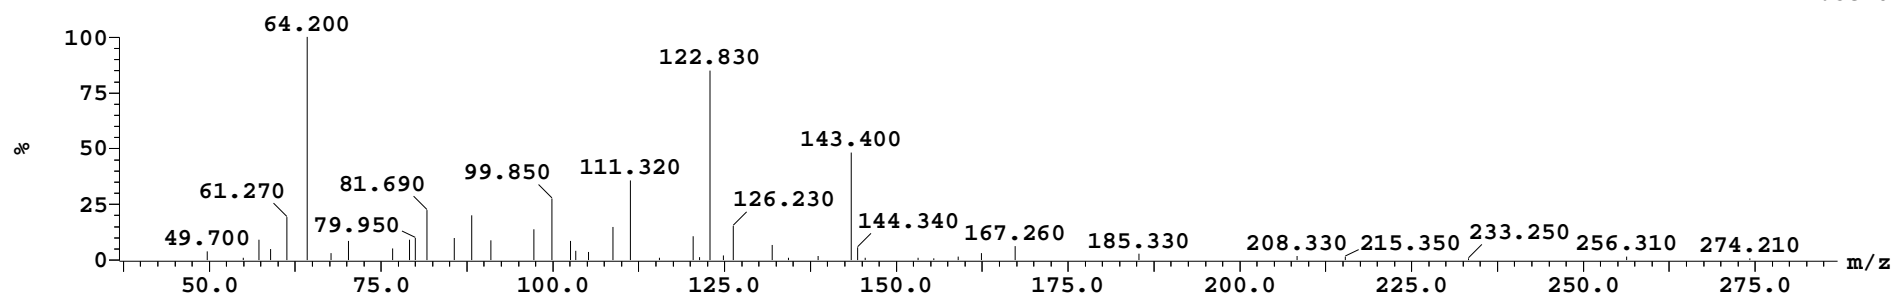

**Openlynx Report -**

Page 17

Sample: 642

Vial:1:B,3

ID:

File:LK-1 R

Date:03-Aug-2023

Time:12:27:58

Description:Default file

Printed: Thu Aug 03 15:04:15 2023

**Sample Report (continued):**

| Peak ID | Compound | Time | Mass Found |
|---------|----------|------|------------|
| 4       |          | 1.08 |            |

4: (Time: 1.08)

2:MS ES+  
3.0e+006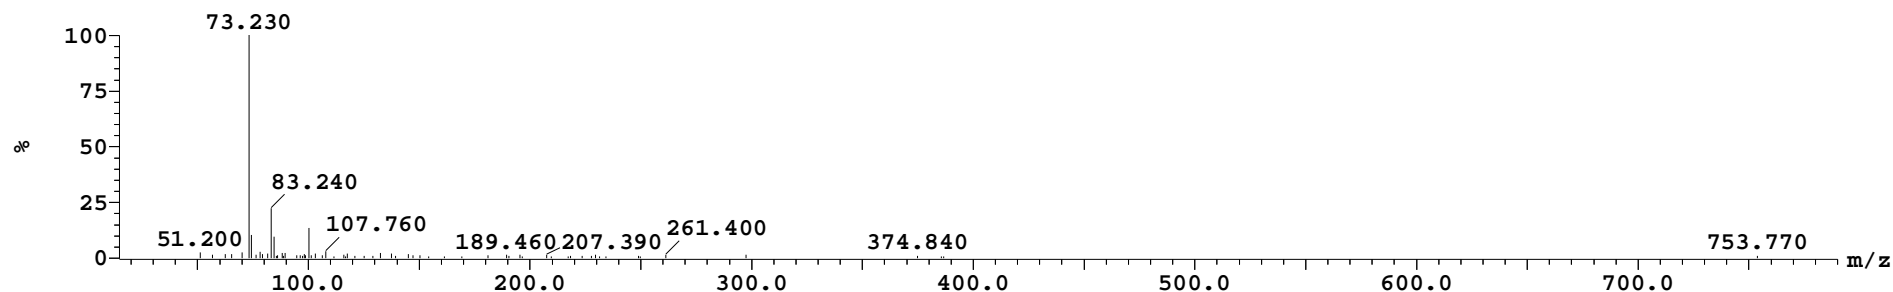

| Peak ID | Compound | Time | Mass Found |
|---------|----------|------|------------|
| 5       |          | 1.10 |            |

5: (Time: 1.10)

2:MS ES+  
3.0e+006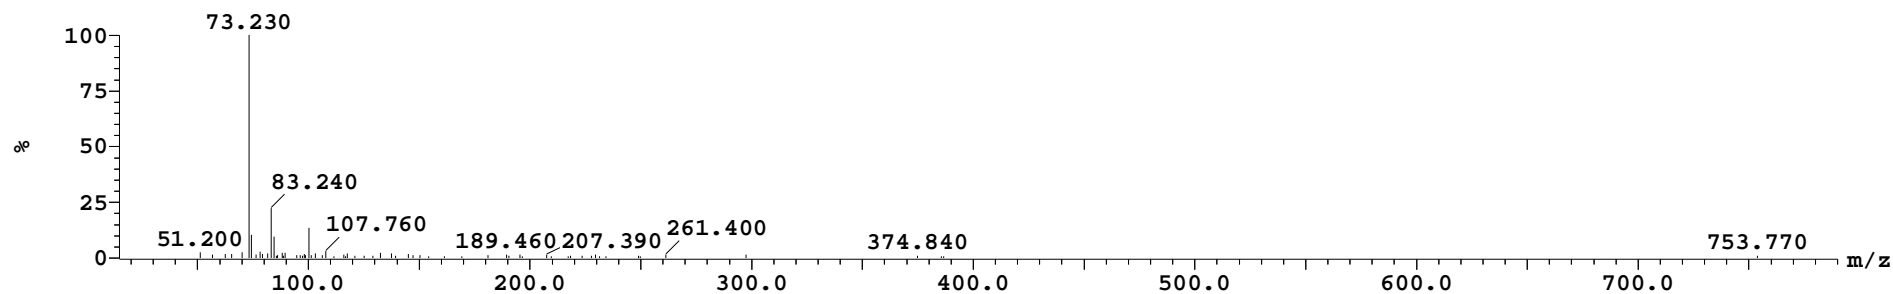

**Openlynx Report -**

Sample: 642  
File: LK-1 R  
Description: Default file

Vial: 1:B,3  
Date: 03-Aug-2023

ID:  
Time: 12:27:58

Page 18

Printed: Thu Aug 03 15:04:15 2023

**Sample Report (continued):**

| Peak ID | Compound | Time | Mass Found |
|---------|----------|------|------------|
|---------|----------|------|------------|

7

4.23

7: (Time: 4.23)

2:MS ES+  
1.5e+006

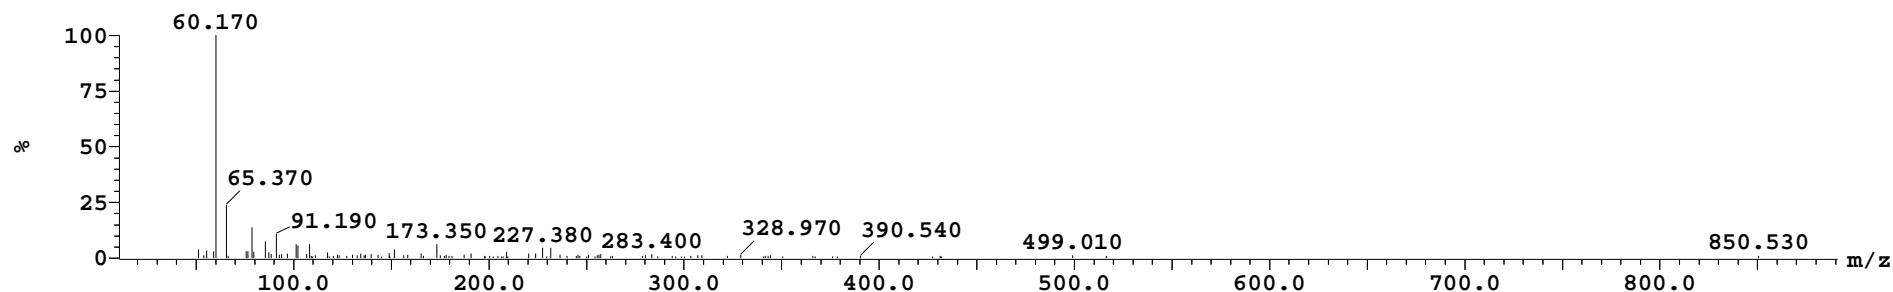

| Peak ID | Compound | Time | Mass Found |
|---------|----------|------|------------|
|---------|----------|------|------------|

8

5.78

8: (Time: 5.78)

2:MS ES+  
5.5e+005

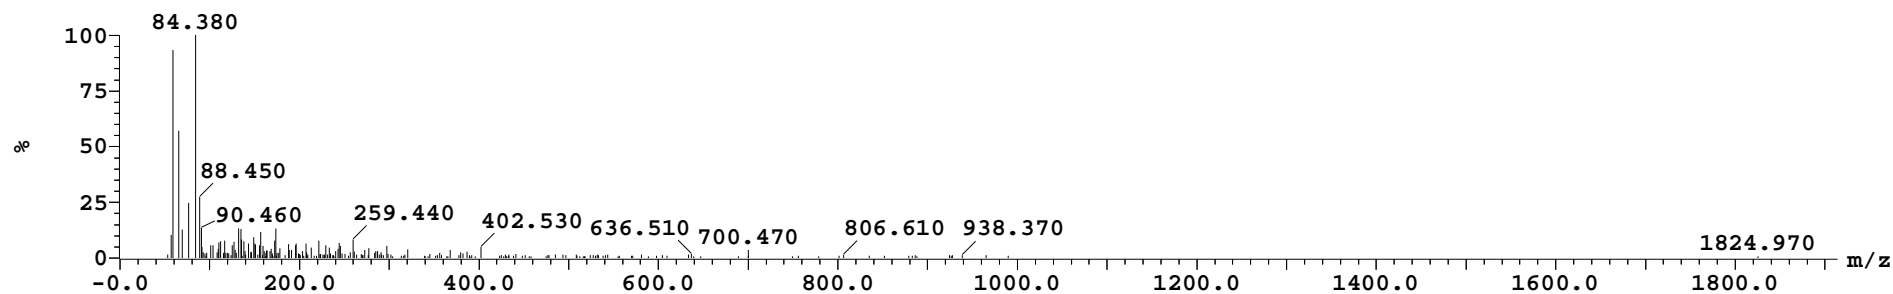

**Openlynx Report -**

Sample: 642  
File: LK-1 R  
Description: Default file

Vial: 1:B,3  
Date: 03-Aug-2023

ID:  
Time: 12:27:58

Page 19

Printed: Thu Aug 03 15:04:15 2023

**Sample Report (continued):**

| Peak ID | Compound | Time | Mass Found |
|---------|----------|------|------------|
|---------|----------|------|------------|

9

5.90

9: (Time: 5.90)

2:MS ES+  
2.1e+006

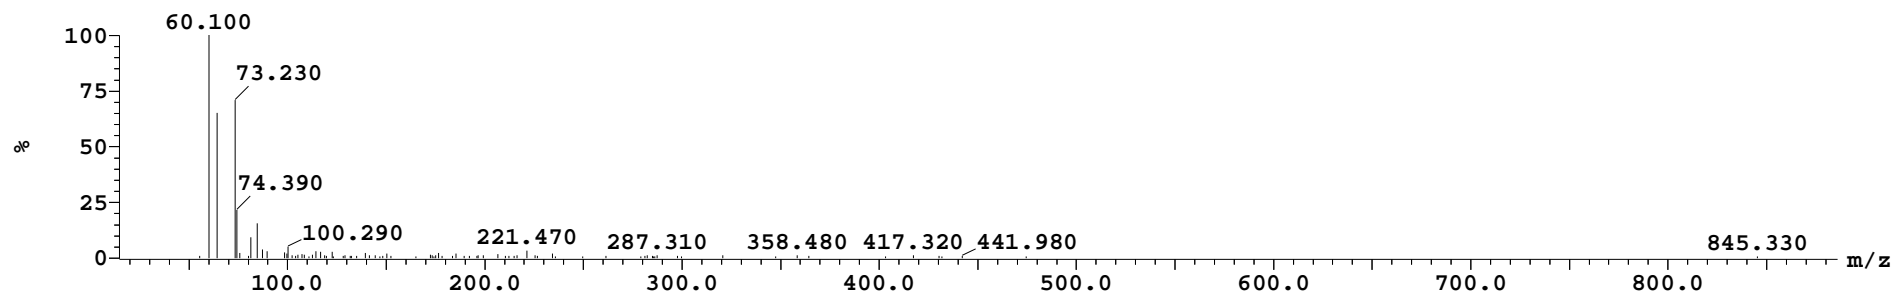

| Peak ID | Compound | Time | Mass Found |
|---------|----------|------|------------|
|---------|----------|------|------------|

10

6.85

10: (Time: 6.85)

2:MS ES+  
7.5e+005

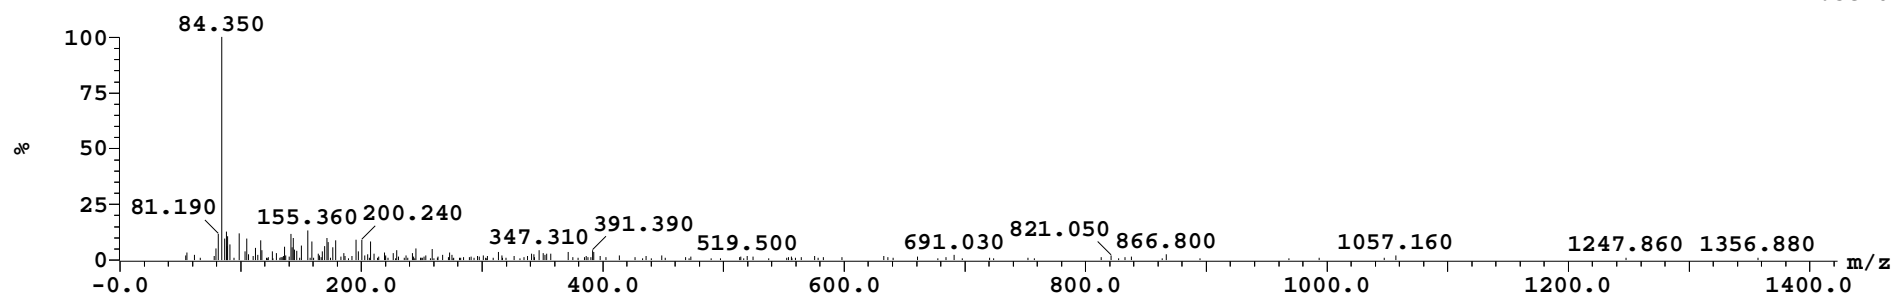



**Openlynx Report -**

Page 20

Sample: 642

Vial:1:B,3

ID:

File:LK-1 R

Date:03-Aug-2023

Time:12:27:58

Description:Default file

Printed: Thu Aug 03 15:04:15 2023

**Sample Report (continued):**

| Peak ID | Compound | Time | Mass Found |
|---------|----------|------|------------|
| 11      |          | 7.83 |            |

11: (Time: 7.83)

2:MS ES+  
4.9e+006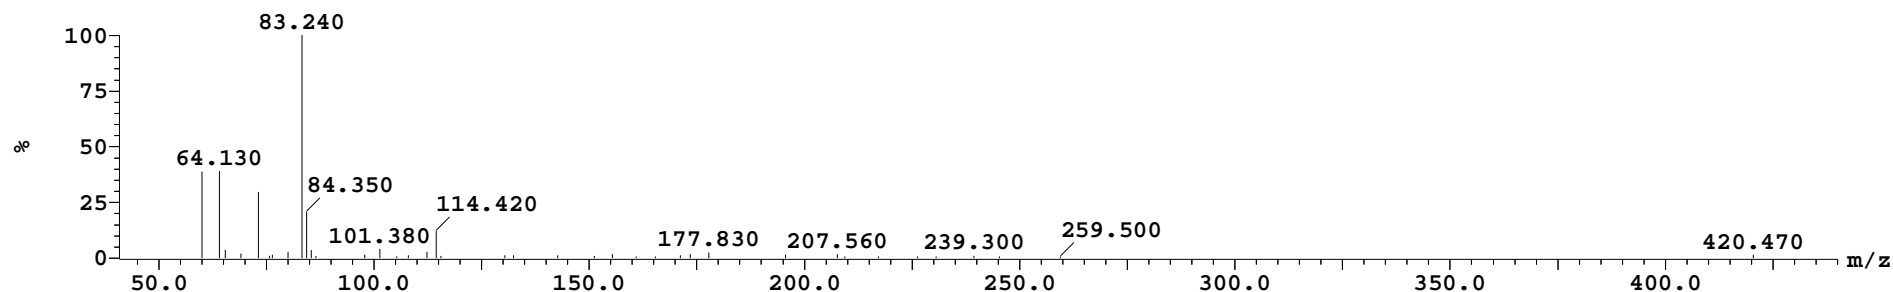

| Peak ID | Compound | Time | Mass Found |
|---------|----------|------|------------|
| 12      |          | 8.65 |            |

12: (Time: 8.65)

2:MS ES+  
2.0e+005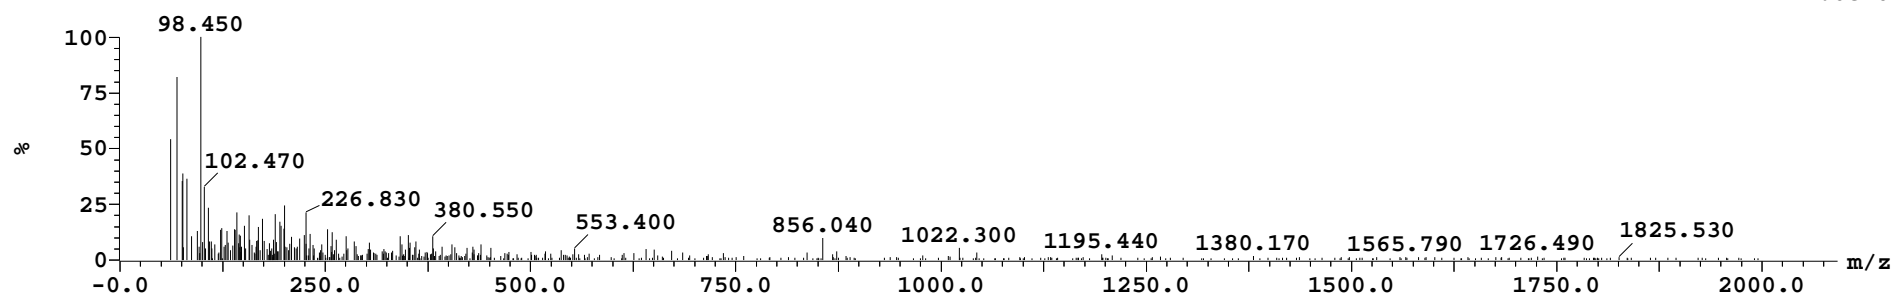

**Openlynx Report -**

Sample: 642  
File:LK-1 R  
Description:Default file

Vial:1:B,3  
Date:03-Aug-2023

ID:  
Time:12:27:58

Page 21

Printed: Thu Aug 03 15:04:15 2023

**Sample Report (continued):**

| Peak ID | Compound | Time | Mass Found |
|---------|----------|------|------------|
|---------|----------|------|------------|

|    |  |      |  |
|----|--|------|--|
| 13 |  | 8.67 |  |
|----|--|------|--|

13: (Time: 8.67)

2:MS ES+  
2.0e+005

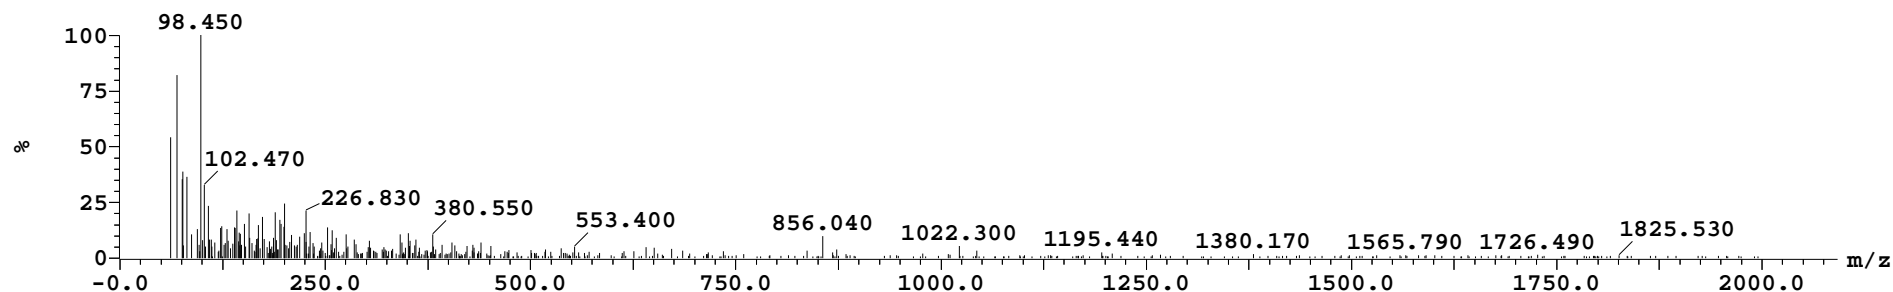

| Peak ID | Compound | Time | Mass Found |
|---------|----------|------|------------|
|---------|----------|------|------------|

|    |  |      |  |
|----|--|------|--|
| 14 |  | 9.15 |  |
|----|--|------|--|

14: (Time: 9.15)

2:MS ES+  
1.7e+006

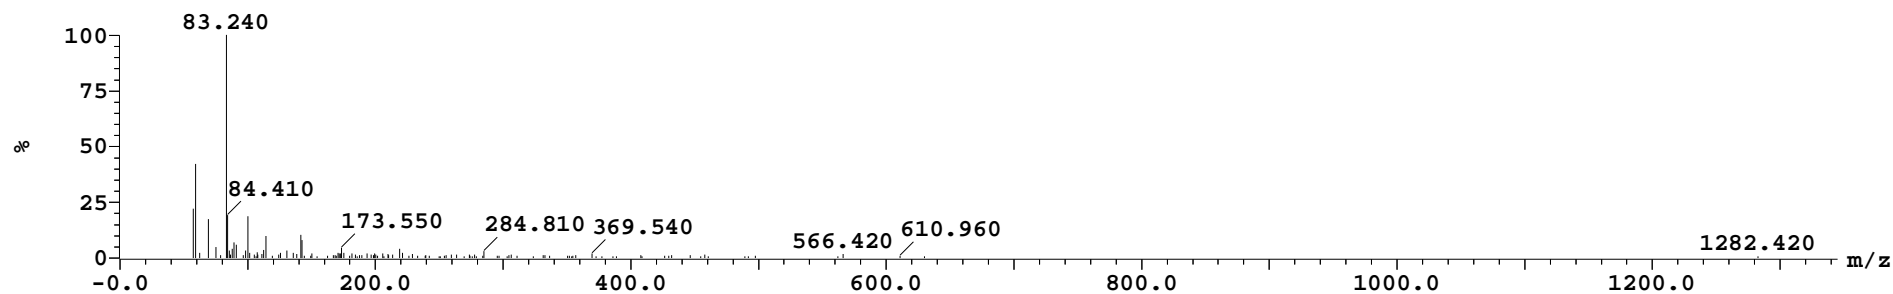

**Openlynx Report -**

Sample: 642  
File: LK-1 R  
Description: Default file

Vial: 1:B,3  
Date: 03-Aug-2023

ID:  
Time: 12:27:58

Page 22

Printed: Thu Aug 03 15:04:15 2023

**Sample Report (continued):**

| Peak ID | Compound | Time | Mass Found |
|---------|----------|------|------------|
|---------|----------|------|------------|

|    |  |       |  |
|----|--|-------|--|
| 15 |  | 10.52 |  |
|----|--|-------|--|

15: (Time: 10.52)

2:MS ES+  
9.2e+005

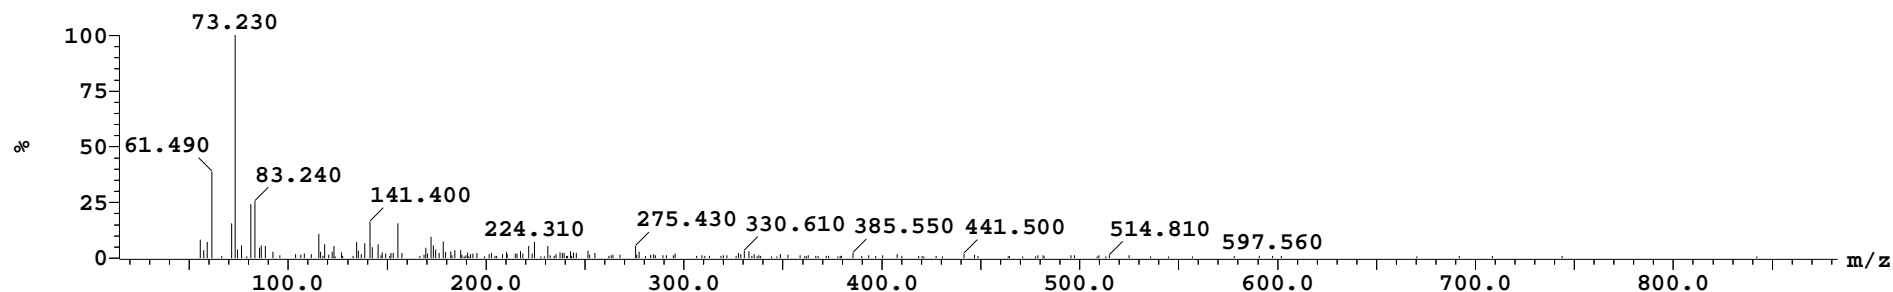

| Peak ID | Compound | Time | Mass Found |
|---------|----------|------|------------|
|---------|----------|------|------------|

|    |  |       |  |
|----|--|-------|--|
| 16 |  | 10.53 |  |
|----|--|-------|--|

16: (Time: 10.53)

2:MS ES+  
4.0e+005

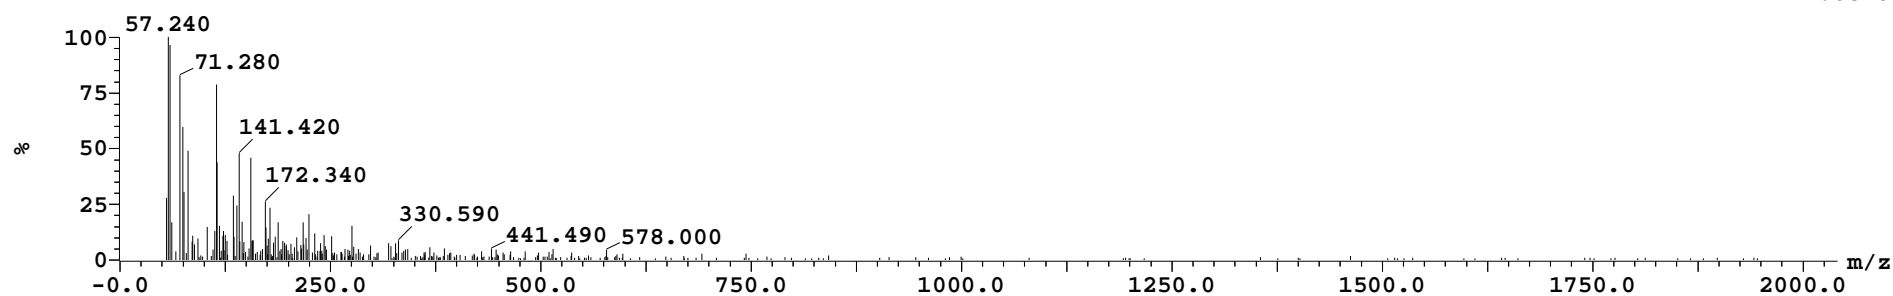

**Openlynx Report -**

Page 23

Sample: 642

Vial:1:B,3

ID:

File:LK-1 R

Date:03-Aug-2023

Time:12:27:58

Description:Default file

Printed: Thu Aug 03 15:04:15 2023

**Sample Report (continued):**

| Peak ID | Compound | Time | Mass Found |
|---------|----------|------|------------|
|---------|----------|------|------------|

|    |  |       |  |
|----|--|-------|--|
| 17 |  | 11.17 |  |
|----|--|-------|--|

17:(Time: 11.17)

2:MS ES+  
1.0e+007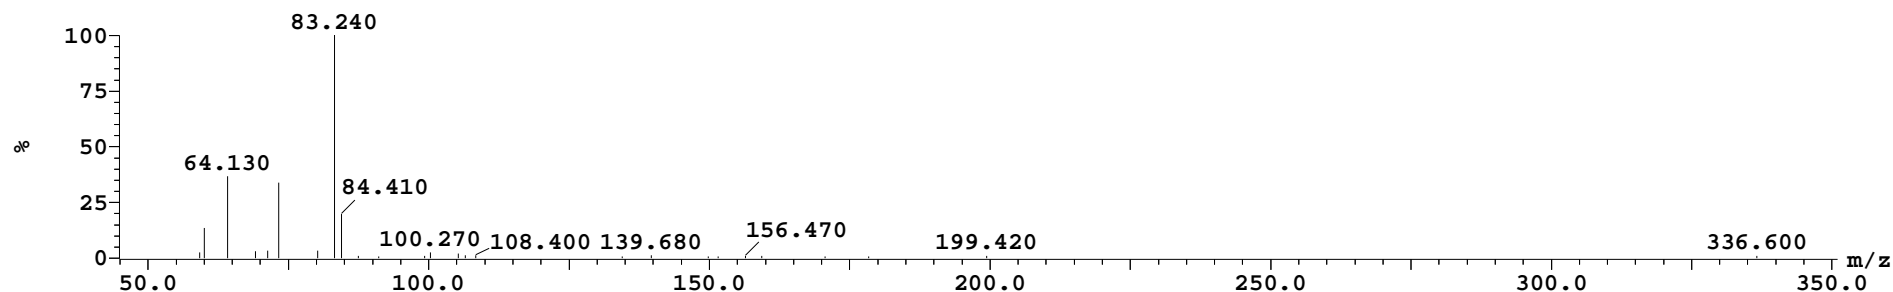

| Peak ID | Compound | Time | Mass Found |
|---------|----------|------|------------|
|---------|----------|------|------------|

|    |  |       |  |
|----|--|-------|--|
| 18 |  | 11.27 |  |
|----|--|-------|--|

18:(Time: 11.27)

2:MS ES+  
1.1e+007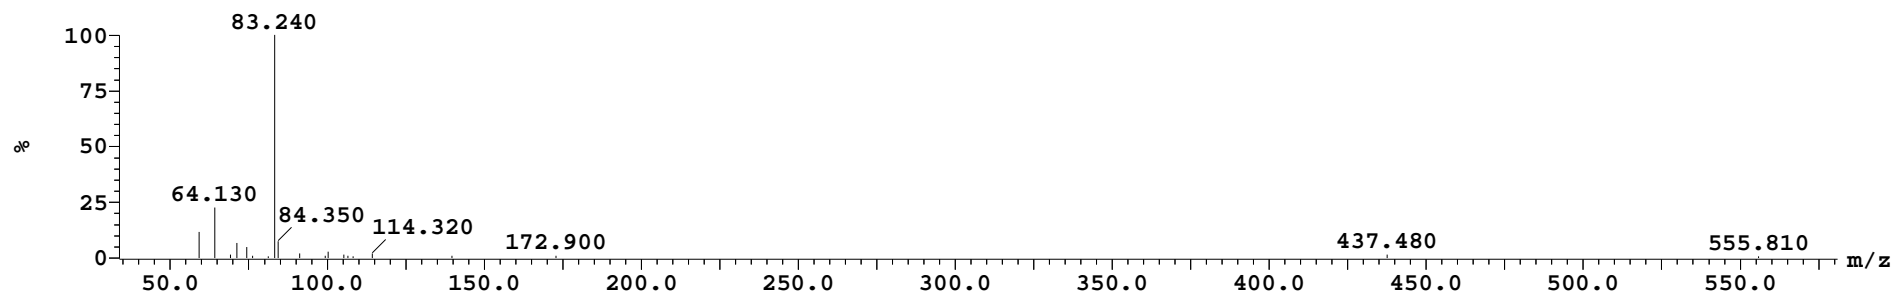

**Openlynx Report -**

Page 24

Sample: 642

Vial:1:B,3

ID:

File:LK-1 R

Date:03-Aug-2023

Time:12:27:58

Description:Default file

Printed: Thu Aug 03 15:04:15 2023

**Sample Report (continued):**

| Peak ID | Compound | Time | Mass Found |
|---------|----------|------|------------|
|---------|----------|------|------------|

|    |  |       |  |
|----|--|-------|--|
| 19 |  | 12.07 |  |
|----|--|-------|--|

19: (Time: 12.07)

2:MS ES+  
5.3e+006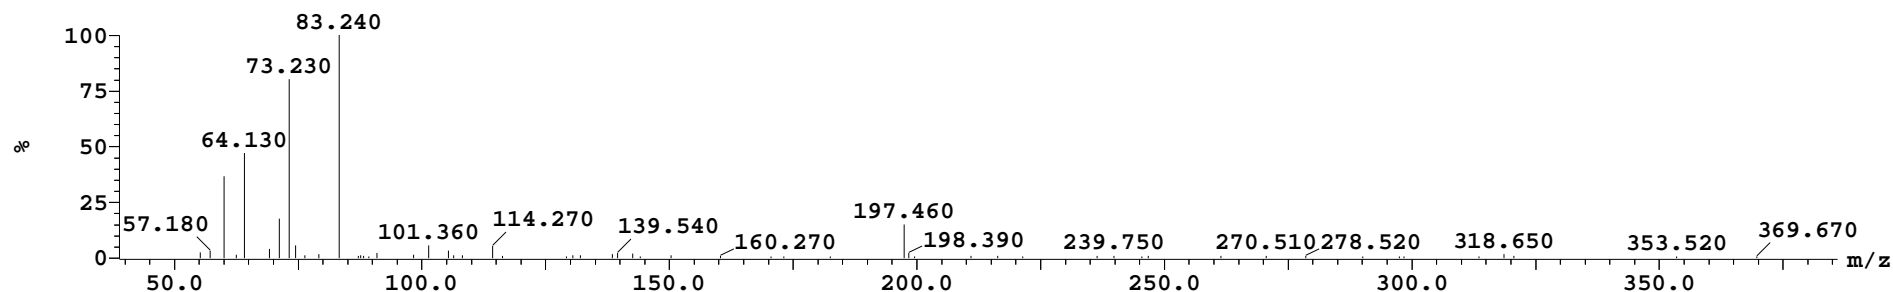

| Peak ID | Compound | Time | Mass Found |
|---------|----------|------|------------|
|---------|----------|------|------------|

|    |  |       |  |
|----|--|-------|--|
| 20 |  | 12.07 |  |
|----|--|-------|--|

20: (Time: 12.07)

2:MS ES+  
5.3e+006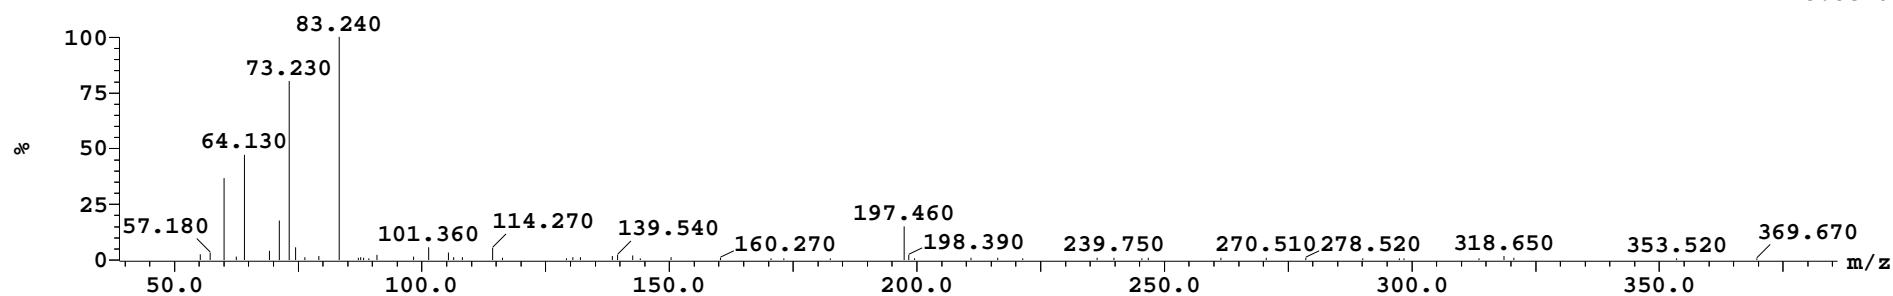

**Openlynx Report -**

Page 25

Sample: 642

Vial:1:B,3

ID:

File:LK-1 R

Date:03-Aug-2023

Time:12:27:58

Description:Default file

Printed: Thu Aug 03 15:04:15 2023

**Sample Report (continued):**

| Peak ID | Compound | Time | Mass Found |
|---------|----------|------|------------|
|---------|----------|------|------------|

|    |  |       |  |
|----|--|-------|--|
| 21 |  | 13.05 |  |
|----|--|-------|--|

21:(Time: 13.05)

2:MS ES+  
8.6e+006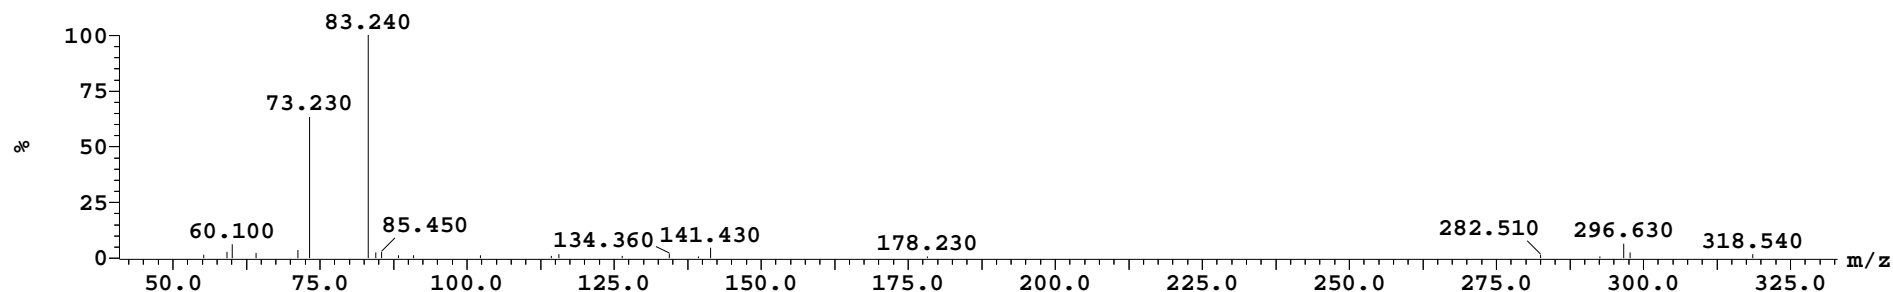

| Peak ID | Compound | Time | Mass Found |
|---------|----------|------|------------|
|---------|----------|------|------------|

|    |  |       |  |
|----|--|-------|--|
| 22 |  | 14.17 |  |
|----|--|-------|--|

22:(Time: 14.17)

2:MS ES+  
2.2e+006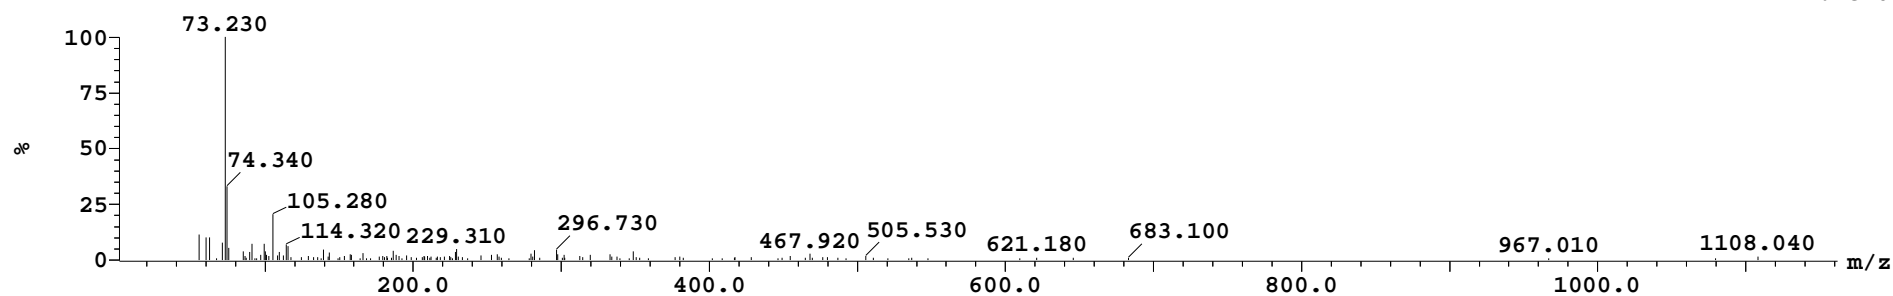

**Openlynx Report -**

Page 26

Sample: 642

Vial:1:B,3

ID:

File:LK-1 R

Date:03-Aug-2023

Time:12:27:58

Description:Default file

Printed: Thu Aug 03 15:04:15 2023

**Sample Report (continued):**

| Peak ID | Compound | Time  | Mass Found |
|---------|----------|-------|------------|
| 23      |          | 14.73 |            |

23:(Time: 14.73)

2:MS ES+  
8.6e+007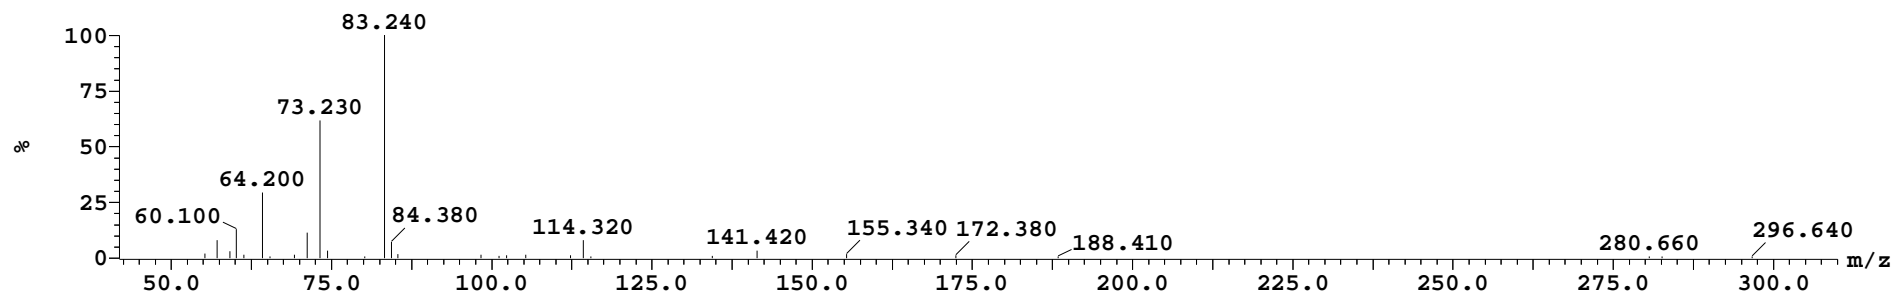

| Peak ID | Compound | Time  | Mass Found |
|---------|----------|-------|------------|
| 24      |          | 16.48 |            |

24:(Time: 16.48)

2:MS ES+  
1.7e+007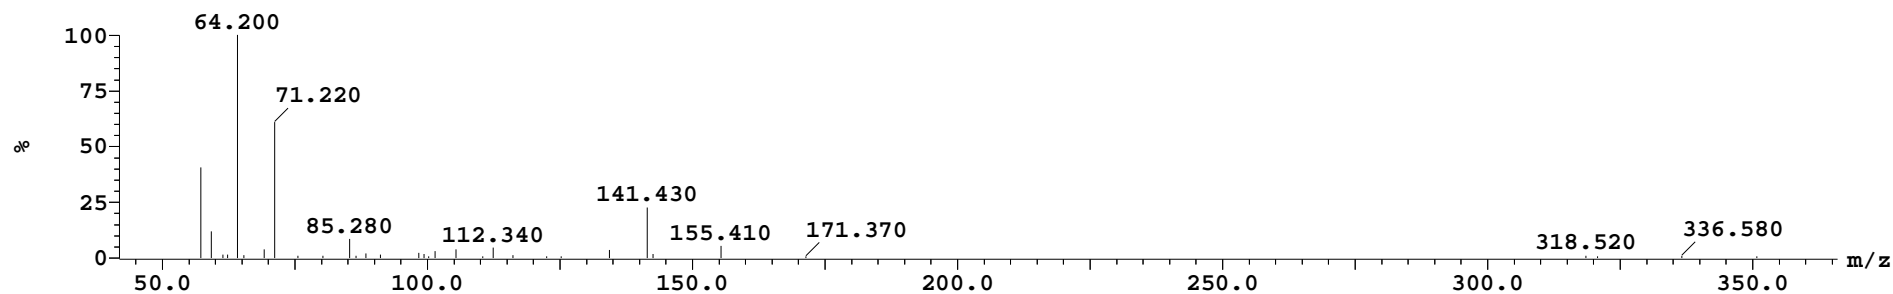

**Openlynx Report -**

Sample: 642  
File:LK-1 R  
Description:Default file

Vial:1:B,3  
Date:03-Aug-2023

ID:  
Time:12:27:58

Page 27

Printed: Thu Aug 03 15:04:15 2023

**Sample Report (continued):**

Peak ID Compound Time Mass Found  
25  
25:(Time: 16.88)

2:MS ES+  
1.6e+007

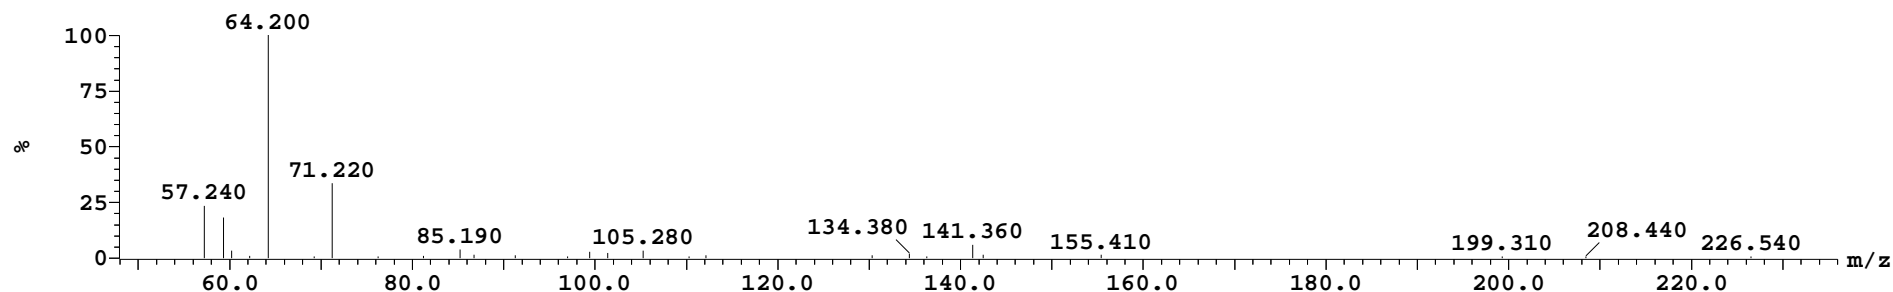

Peak ID Compound Time Mass Found  
26  
26:(Time: 17.28)

2:MS ES+  
2.6e+006

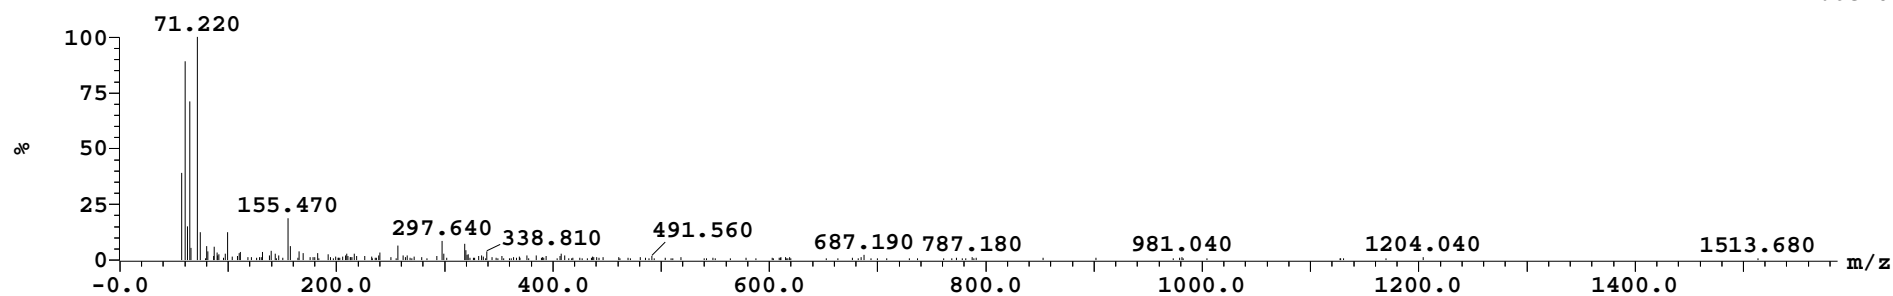



Openlynx Report -

Sample: 642  
File:LK-1 R  
Description:Default file

Vial:1:B,3  
Date:03-Aug-2023

ID:  
Time:12:27:58

Printed: Thu Aug 03 15:04:15 2023

Sample Report (continued):

| Peak ID | Compound | Time  | Mass Found |
|---------|----------|-------|------------|
| 27      |          | 21.70 |            |

27:(Time: 21.70)

2:MS ES+  
2.9e+007

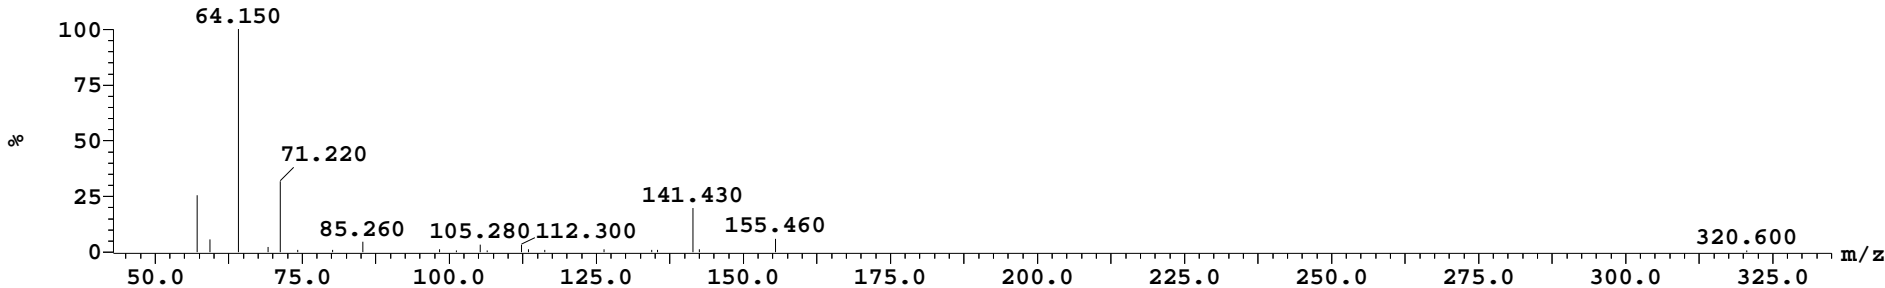

# Openlynx Report -

Sample: 643  
File: LK-2  
Description: Default file

Vial: 1:B,4  
Date: 03-Aug-2023

ID:  
Time: 12:54:05

Page 1

Printed: Thu Aug 03 15:05:03 2023

## Sample Report:

Sample 643 Vial 1:B,4 ID File LK-2 Date 03-Aug-2023 Time 12:54:05 Description Default file

1: MS ES- :TIC

5.9e+006

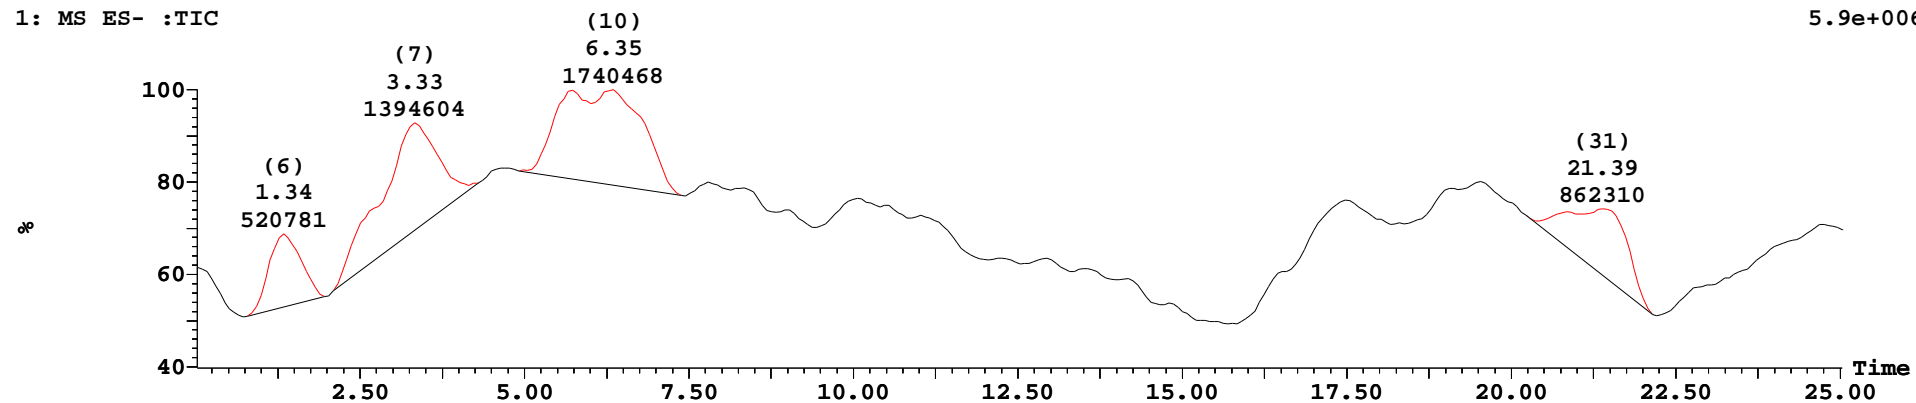

| Peak Number | Compound | Time  | AreaAbs | Area %Total | Width | Height | Mass Found |
|-------------|----------|-------|---------|-------------|-------|--------|------------|
| 6           |          | 1.34  | 5e+005  | 11.53       | 1     | 9e+005 |            |
| 7           |          | 3.33  | 1e+006  | 30.87       | 2     | 1e+006 |            |
| 10          |          | 6.35  | 2e+006  | 38.52       | 2     | 1e+006 |            |
| 31          |          | 21.39 | 9e+005  | 19.09       | 2     | 8e+005 |            |

2: MS ES+ :TIC

3.0e+008

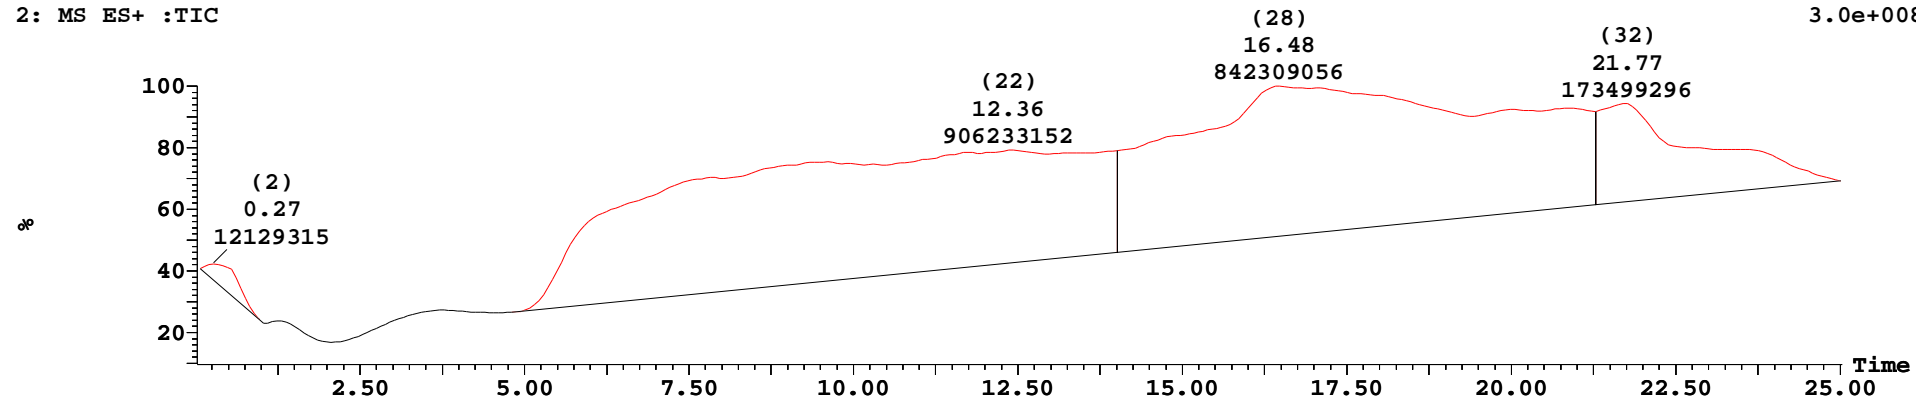

| Peak Number | Compound | Time  | AreaAbs | Area %Total | Width | Height | Mass Found |
|-------------|----------|-------|---------|-------------|-------|--------|------------|
| 2           |          | 0.27  | 1e+007  | 0.63        | 1     | 2e+007 |            |
| 22          |          | 12.36 | 9e+008  | 46.85       | 9     | 1e+008 |            |

# Openlynx Report -

Sample: 643  
File: LK-2  
Description: Default file

Vial: 1:B,4  
Date: 03-Aug-2023

ID:  
Time: 12:54:05

Page 2

Printed: Thu Aug 03 15:05:03 2023

## Sample Report (continued):

|    |       |        |       |   |        |
|----|-------|--------|-------|---|--------|
| 28 | 16.48 | 8e+008 | 43.55 | 7 | 1e+008 |
| 32 | 21.77 | 2e+008 | 8.97  | 4 | 1e+008 |

3: UV Detector: 214

5.478e-2  
Range: 9.367e-2

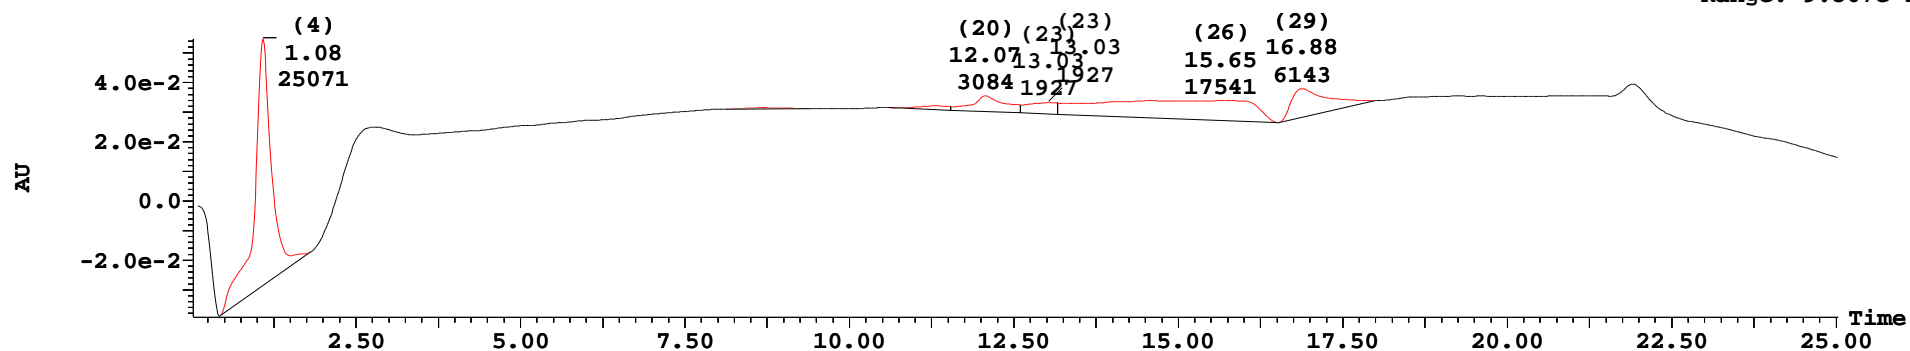

| Peak Number | Compound | Time  | AreaAbs | Area %Total | Width | Height | Mass Found |
|-------------|----------|-------|---------|-------------|-------|--------|------------|
| 4           |          | 1.08  | 3e+004  | 45.80       | 1     | 8e+004 |            |
| 13          |          | 8.67  | 3e+002  | 0.59        | 1     | 6e+002 |            |
| 19          |          | 11.30 | 6e+002  | 1.18        | 1     | 1e+003 |            |
| 20          |          | 12.07 | 3e+003  | 5.63        | 1     | 5e+003 |            |
| 23          |          | 13.03 | 2e+003  | 3.52        | 1     | 4e+003 |            |
| 26          |          | 15.65 | 2e+004  | 32.05       | 3     | 7e+003 |            |
| 29          |          | 16.88 | 6e+003  | 11.22       | 1     | 1e+004 |            |

3: UV Detector: 254

6.152e-3  
Range: 6.906e-3

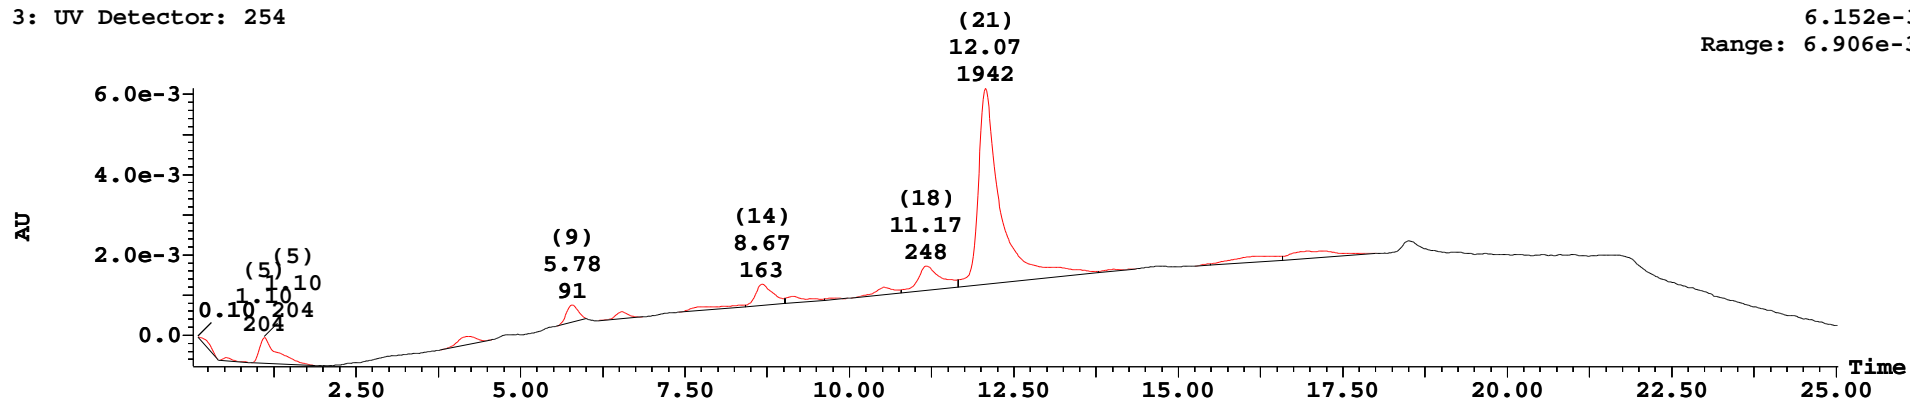

**Openlynx Report -**

Sample: 643  
File:LK-2  
Description:Default file

Vial:1:B,4  
Date:03-Aug-2023

ID:  
Time:12:54:05

Page 3

Printed: Thu Aug 03 15:05:03 2023

**Sample Report (continued):**

| Peak Number | Compound | Time  | AreaAbs | Area %Total | Width | Height | Mass Found |
|-------------|----------|-------|---------|-------------|-------|--------|------------|
| 1           |          | 0.10  | 3e+001  | 0.80        | 0     |        |            |
| 3           |          | 0.53  | 1e+001  | 0.41        | 0     | 8e+001 |            |
| 5           |          | 1.10  | 2e+002  | 6.29        | 1     | 6e+002 |            |
| 8           |          | 4.22  | 7e+001  | 2.02        | 1     | 2e+002 |            |
| 9           |          | 5.78  | 9e+001  | 2.78        | 0     | 4e+002 |            |
| 11          |          | 6.53  | 4e+001  | 1.17        | 1     | 2e+002 |            |
| 12          |          | 8.42  | 6e+001  | 1.79        | 1     | 4e+001 |            |
| 14          |          | 8.67  | 2e+002  | 5.03        | 1     | 5e+002 |            |
| 15          |          | 9.13  | 5e+001  | 1.67        | 1     | 2e+002 |            |
| 16          |          | 9.77  | 9e+000  | 0.28        | 0     | 4e+001 |            |
| 17          |          | 10.53 | 6e+001  | 1.83        | 1     | 2e+002 |            |
| 18          |          | 11.17 | 2e+002  | 7.64        | 1     | 6e+002 |            |
| 21          |          | 12.07 | 2e+003  | 59.74       | 2     | 5e+003 |            |
| 24          |          | 14.35 | 1e+001  | 0.42        | 1     |        |            |
| 25          |          | 15.48 | 5e+000  | 0.16        | 0     | 3e+001 |            |
| 27          |          | 16.37 | 1e+002  | 3.58        | 1     | 1e+002 |            |
| 30          |          | 17.20 | 1e+002  | 4.39        | 1     | 2e+002 |            |

Peak ID Compound Time Mass Found  
1 0.10  
1: (Time: 0.10)

1:MS ES-  
3.1e+005

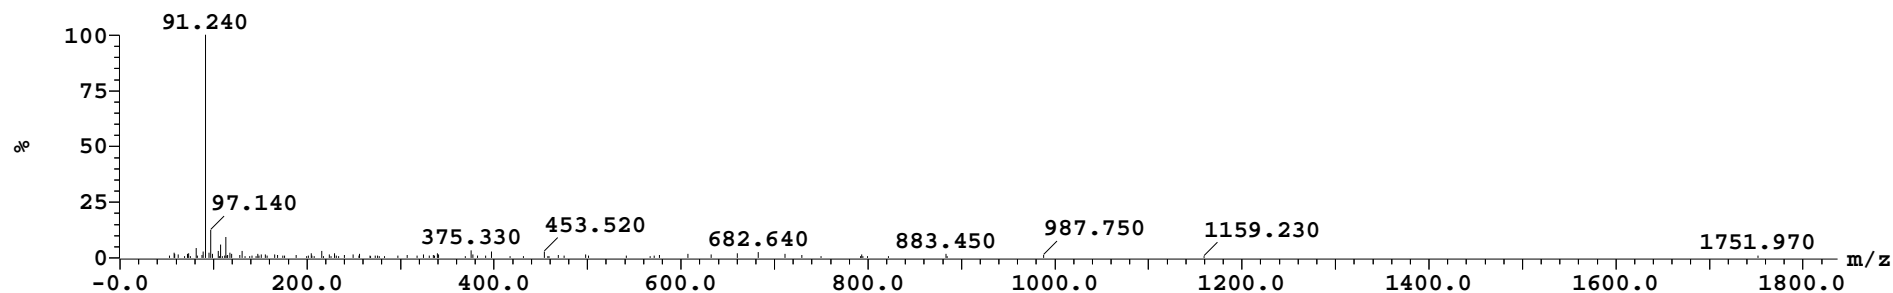

**Openlynx Report -**

Sample: 643  
File:LK-2  
Description:Default file

Vial:1:B,4  
Date:03-Aug-2023

ID:  
Time:12:54:05

Page 4

Printed: Thu Aug 03 15:05:03 2023

**Sample Report (continued):**

| Peak ID | Compound | Time | Mass Found |
|---------|----------|------|------------|
|---------|----------|------|------------|

|   |  |      |  |
|---|--|------|--|
| 3 |  | 0.53 |  |
|---|--|------|--|

3: (Time: 0.53)

1:MS ES-  
2.1e+005

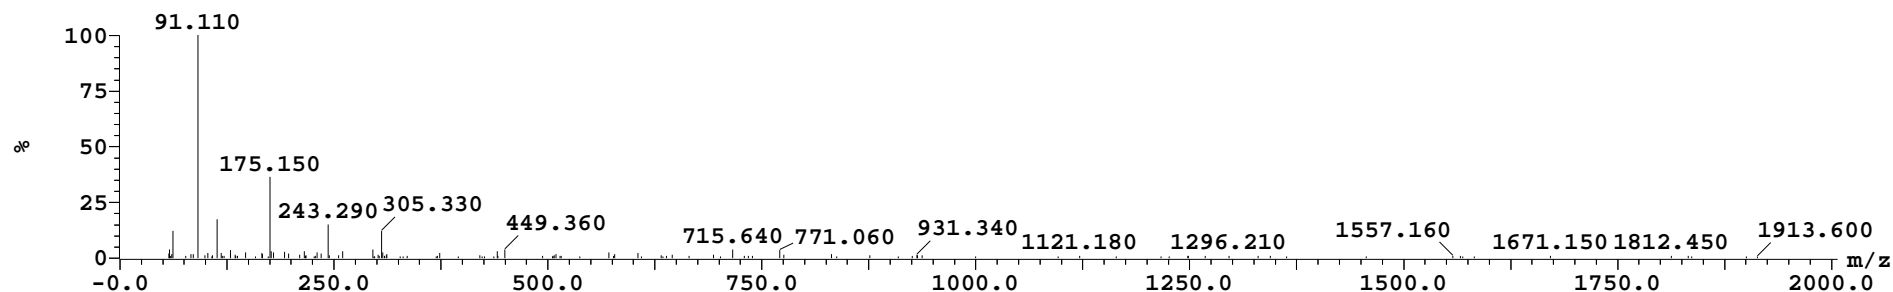

| Peak ID | Compound | Time | Mass Found |
|---------|----------|------|------------|
|---------|----------|------|------------|

|   |  |      |  |
|---|--|------|--|
| 4 |  | 1.08 |  |
|---|--|------|--|

4: (Time: 1.08)

1:MS ES-  
3.2e+005

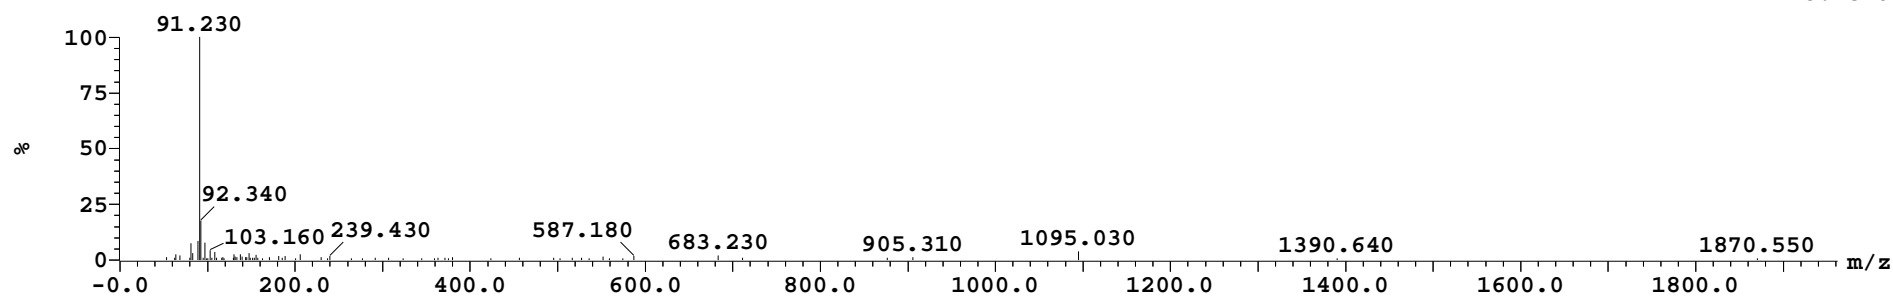

**Openlynx Report -**

Page 5

Sample: 643

Vial:1:B,4

ID:

File:LK-2

Date:03-Aug-2023

Time:12:54:05

Description:Default file

Printed: Thu Aug 03 15:05:03 2023

**Sample Report (continued):**

| Peak ID | Compound | Time | Mass Found |
|---------|----------|------|------------|
|---------|----------|------|------------|

5

1.10

5: (Time: 1.10)

1:MS ES-  
2.6e+006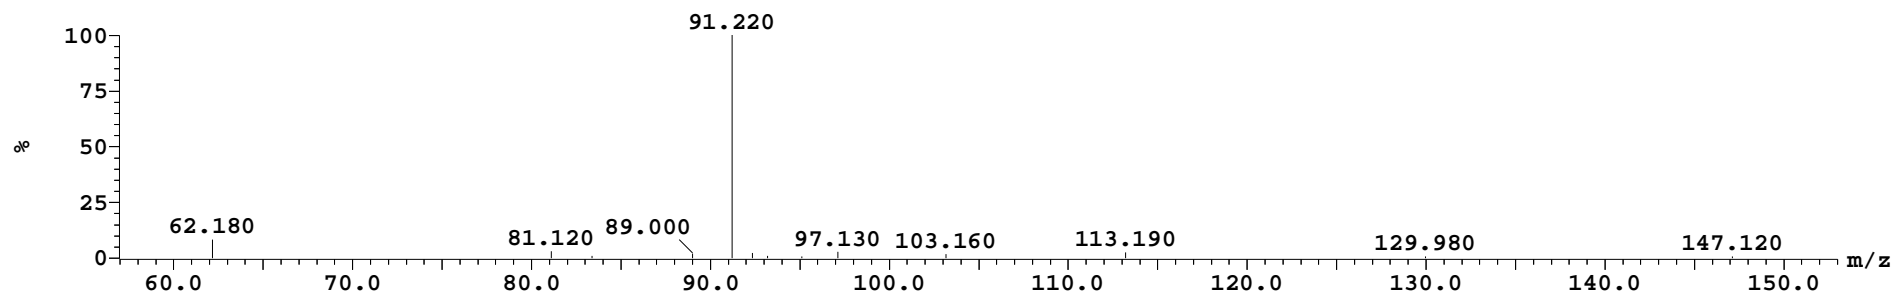

| Peak ID | Compound | Time | Mass Found |
|---------|----------|------|------------|
|---------|----------|------|------------|

6

1.34

6: (Time: 1.34)

1:MS ES-  
5.8e+004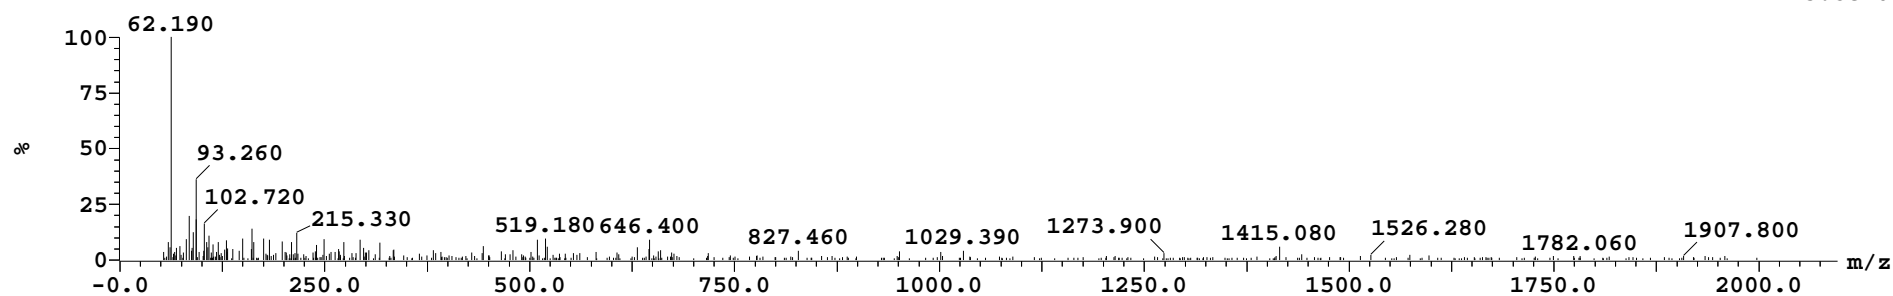

**Openlynx Report -**

Sample: 643

File:LK-2

Description:Default file

Vial:1:B,4

Date:03-Aug-2023

ID:

Time:12:54:05

Page 6

Printed: Thu Aug 03 15:05:03 2023

**Sample Report (continued):**

| Peak ID | Compound | Time | Mass Found |
|---------|----------|------|------------|
|---------|----------|------|------------|

7

3.33

7: (Time: 3.33)

1:MS ES-  
1.3e+005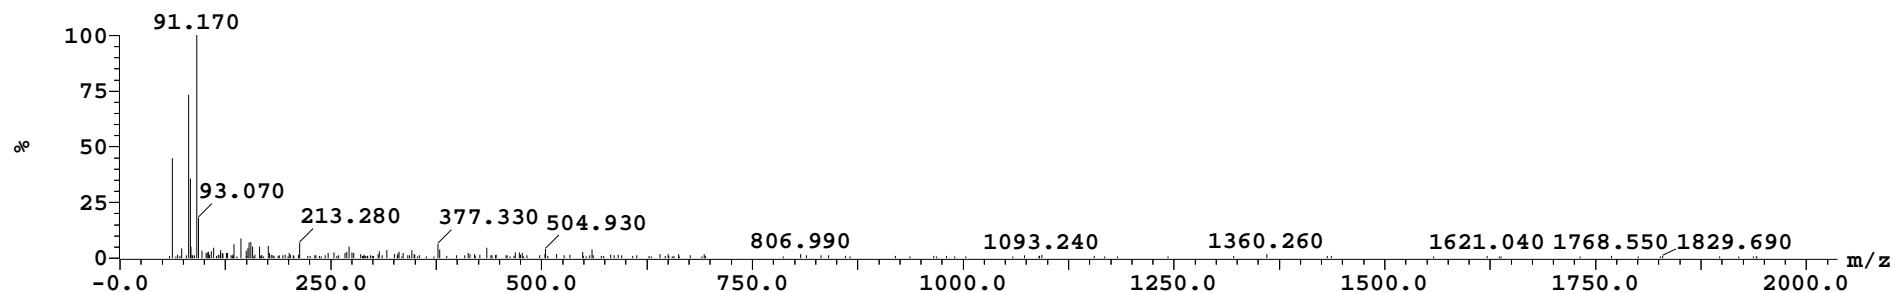

| Peak ID | Compound | Time | Mass Found |
|---------|----------|------|------------|
|---------|----------|------|------------|

8

4.22

8: (Time: 4.22)

1:MS ES-  
4.3e+004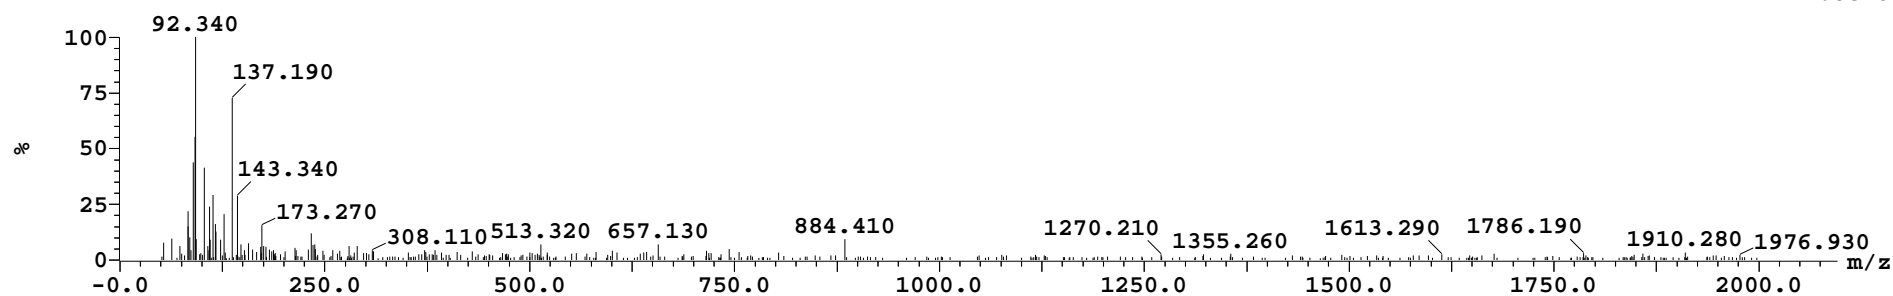

**Openlynx Report -**

Sample: 643  
File:LK-2  
Description:Default file

Vial:1:B,4  
Date:03-Aug-2023

ID:  
Time:12:54:05

Page 7

Printed: Thu Aug 03 15:05:03 2023

**Sample Report (continued):**

| Peak ID | Compound | Time | Mass Found |
|---------|----------|------|------------|
|---------|----------|------|------------|

9

5.78

9: (Time: 5.78)

1:MS ES-  
2.0e+005

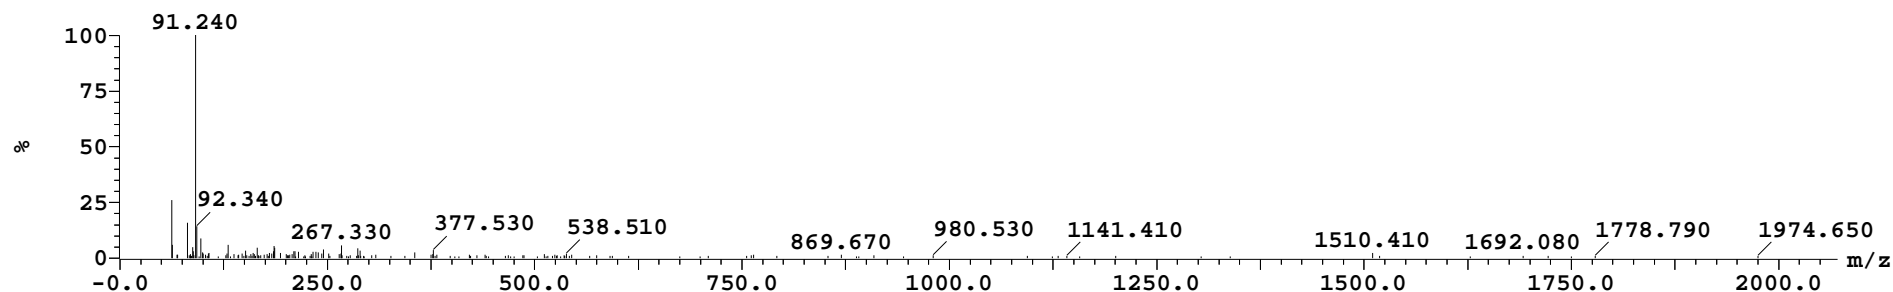

| Peak ID | Compound | Time | Mass Found |
|---------|----------|------|------------|
|---------|----------|------|------------|

10

6.35

10: (Time: 6.35)

1:MS ES-  
3.6e+005

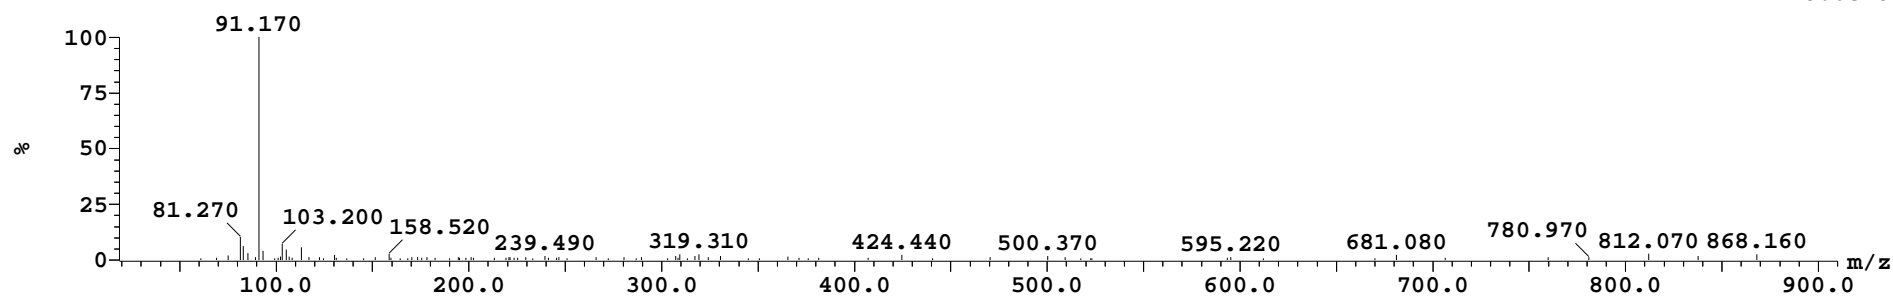



**Openlynx Report -**

Sample: 643  
File:LK-2  
Description:Default file

Vial:1:B,4  
Date:03-Aug-2023

ID:  
Time:12:54:05

Page 8

Printed: Thu Aug 03 15:05:03 2023

**Sample Report (continued):**

| Peak ID | Compound | Time | Mass Found |
|---------|----------|------|------------|
|---------|----------|------|------------|

|    |  |      |  |
|----|--|------|--|
| 11 |  | 6.53 |  |
|----|--|------|--|

11:(Time: 6.53)

1:MS ES-  
5.8e+004

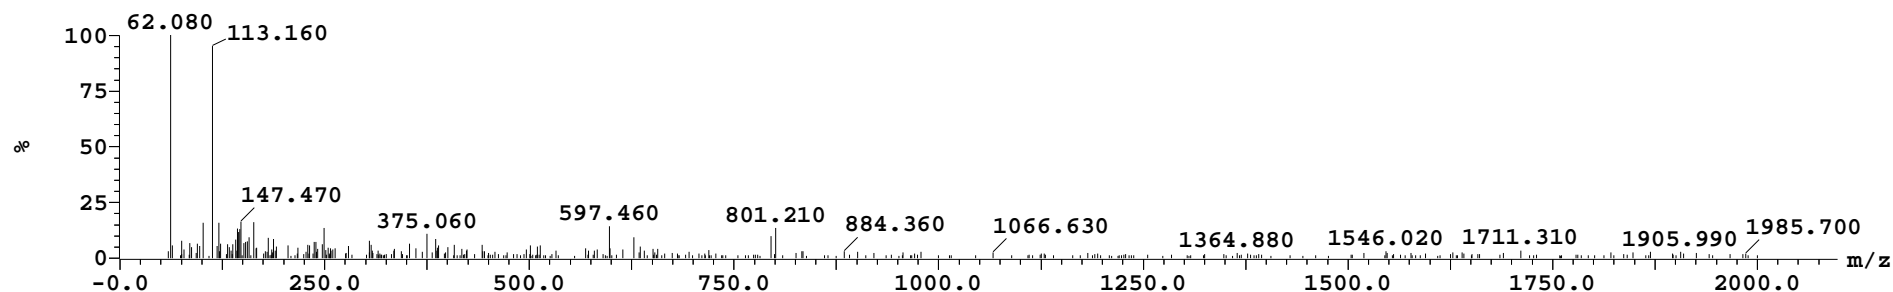

| Peak ID | Compound | Time | Mass Found |
|---------|----------|------|------------|
|---------|----------|------|------------|

|    |  |      |  |
|----|--|------|--|
| 12 |  | 8.42 |  |
|----|--|------|--|

12:(Time: 8.42)

1:MS ES-  
3.2e+005

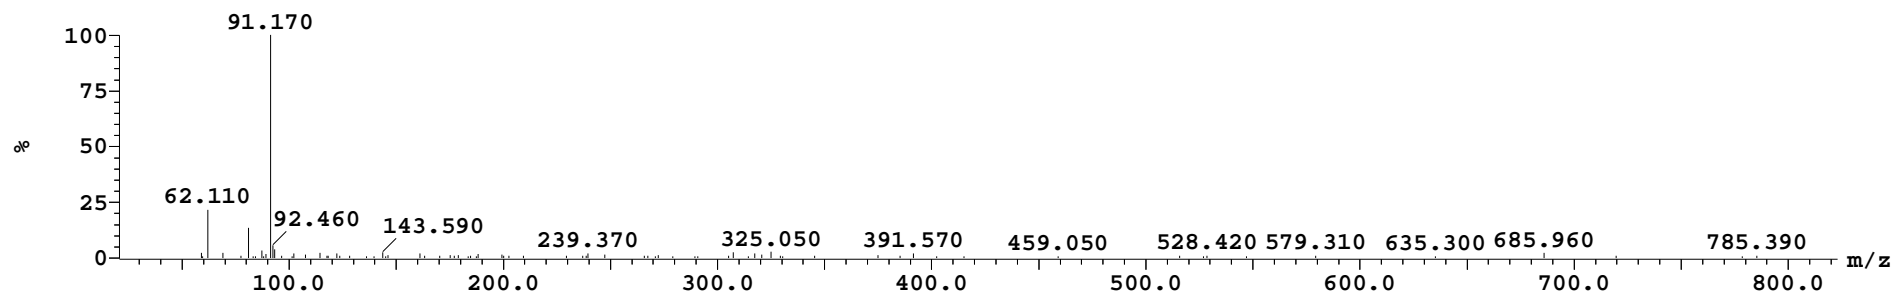

**Openlynx Report -**

Sample: 643

File:LK-2

Description:Default file

Vial:1:B,4

Date:03-Aug-2023

ID:

Time:12:54:05

Page 9

Printed: Thu Aug 03 15:05:03 2023

**Sample Report (continued):**

| Peak ID | Compound | Time | Mass Found |
|---------|----------|------|------------|
|---------|----------|------|------------|

13

8.67

13: (Time: 8.67)

1:MS ES-  
2.4e+004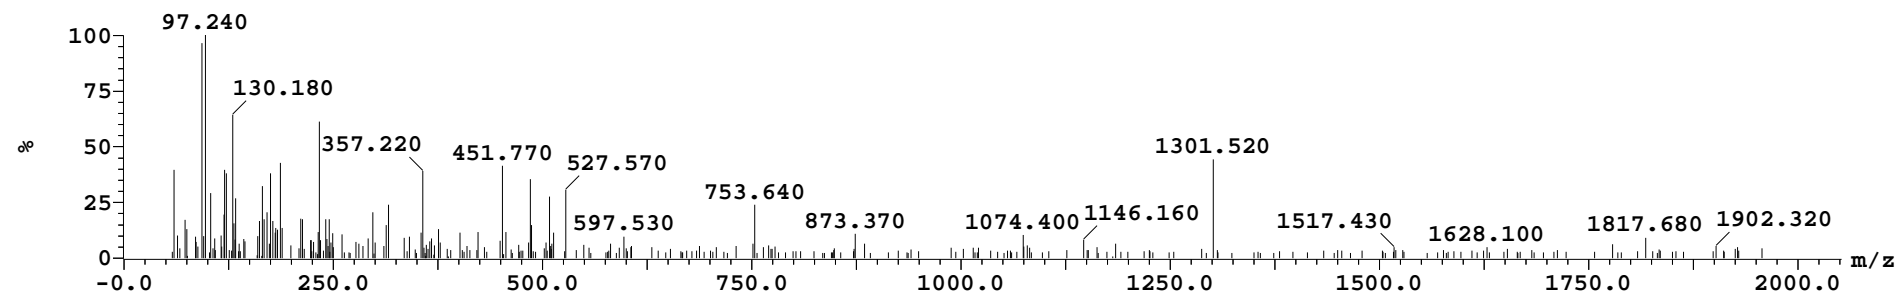

| Peak ID | Compound | Time | Mass Found |
|---------|----------|------|------------|
|---------|----------|------|------------|

14

8.67

14: (Time: 8.67)

1:MS ES-  
2.4e+004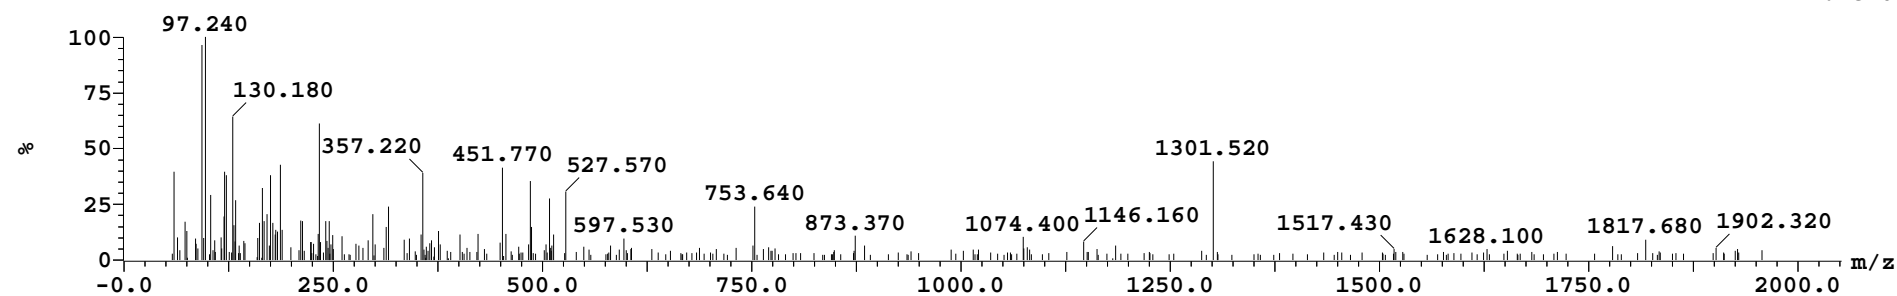

**Openlynx Report -**

Page 10

Sample: 643

Vial:1:B,4

ID:

File:LK-2

Date:03-Aug-2023

Time:12:54:05

Description:Default file

Printed: Thu Aug 03 15:05:03 2023

**Sample Report (continued):**

| Peak ID | Compound | Time | Mass Found |
|---------|----------|------|------------|
| 15      |          | 9.13 |            |

15:(Time: 9.13)

1:MS ES-  
2.7e+006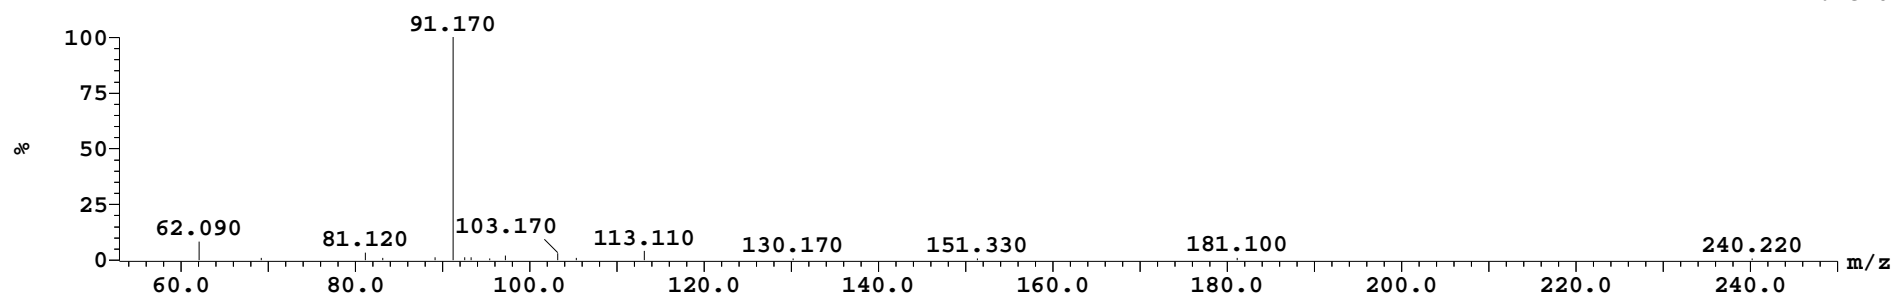

| Peak ID | Compound | Time | Mass Found |
|---------|----------|------|------------|
| 16      |          | 9.77 |            |

16:(Time: 9.77)

1:MS ES-  
3.7e+005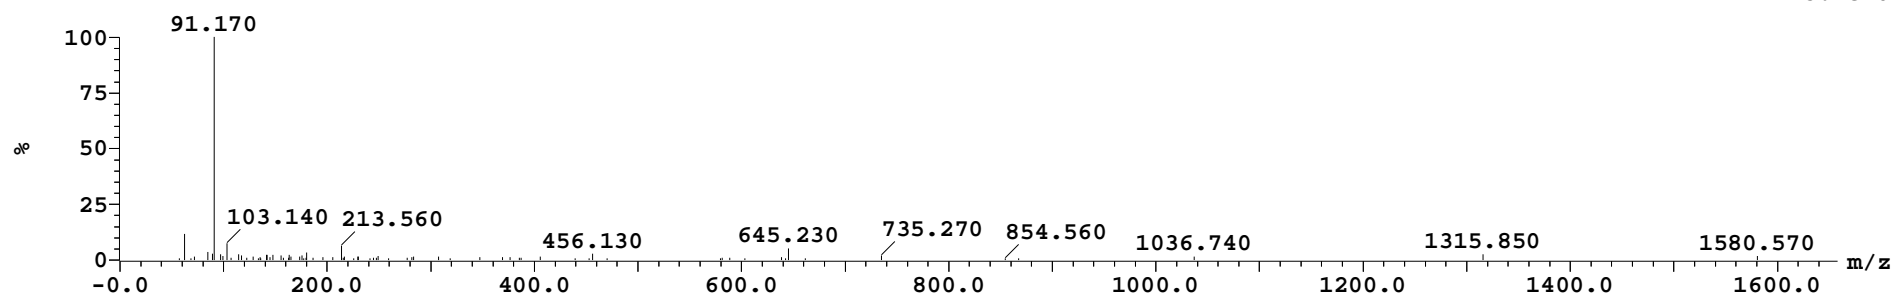

**Openlynx Report -**

Page 11

Sample: 643

Vial:1:B,4

ID:

File:LK-2

Date:03-Aug-2023

Time:12:54:05

Description:Default file

Printed: Thu Aug 03 15:05:03 2023

**Sample Report (continued):**

| Peak ID | Compound | Time | Mass Found |
|---------|----------|------|------------|
|---------|----------|------|------------|

|    |  |       |  |
|----|--|-------|--|
| 17 |  | 10.53 |  |
|----|--|-------|--|

17:(Time: 10.53)

1:MS ES-  
2.4e+005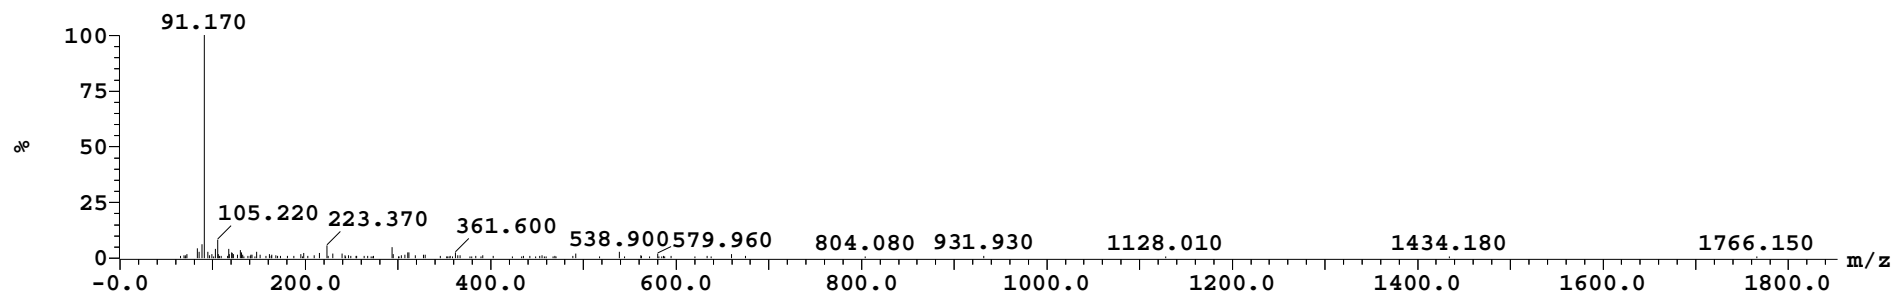

| Peak ID | Compound | Time | Mass Found |
|---------|----------|------|------------|
|---------|----------|------|------------|

|    |  |       |  |
|----|--|-------|--|
| 18 |  | 11.17 |  |
|----|--|-------|--|

18:(Time: 11.17)

1:MS ES-  
2.3e+004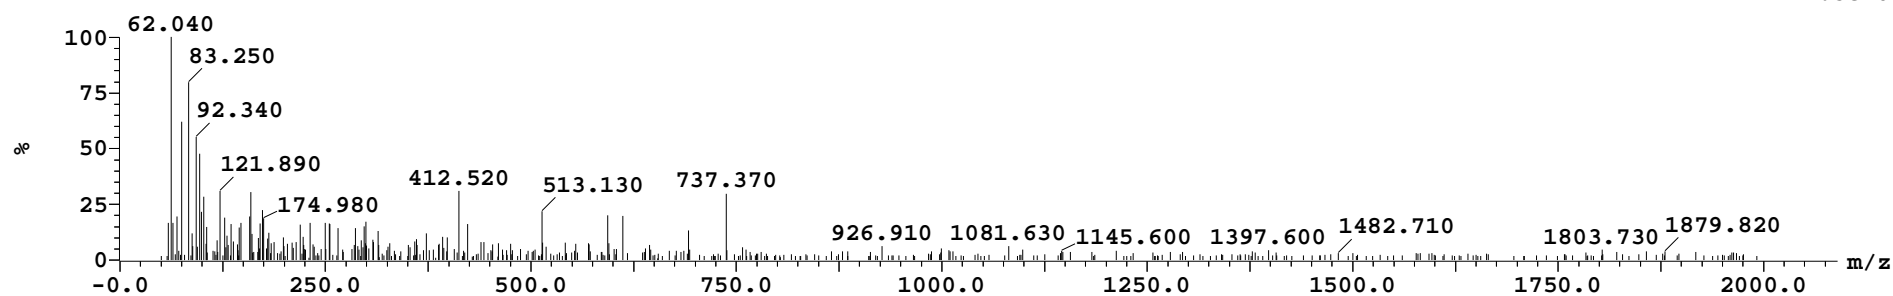

**Openlynx Report -**

Sample: 643

File:LK-2

Description:Default file

Vial:1:B,4

Date:03-Aug-2023

ID:

Time:12:54:05

Page 12

Printed: Thu Aug 03 15:05:03 2023

**Sample Report (continued):**

| Peak ID | Compound | Time | Mass Found |
|---------|----------|------|------------|
|---------|----------|------|------------|

|    |  |       |  |
|----|--|-------|--|
| 19 |  | 11.30 |  |
|----|--|-------|--|

19: (Time: 11.30)

1:MS ES-  
2.1e+004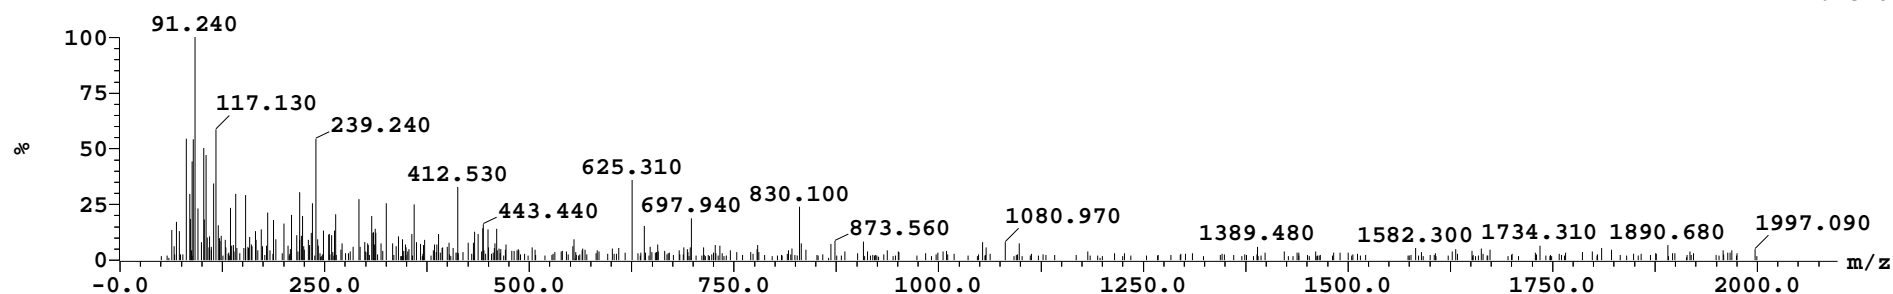

| Peak ID | Compound | Time | Mass Found |
|---------|----------|------|------------|
|---------|----------|------|------------|

|    |  |       |  |
|----|--|-------|--|
| 20 |  | 12.07 |  |
|----|--|-------|--|

20: (Time: 12.07)

1:MS ES-  
4.7e+004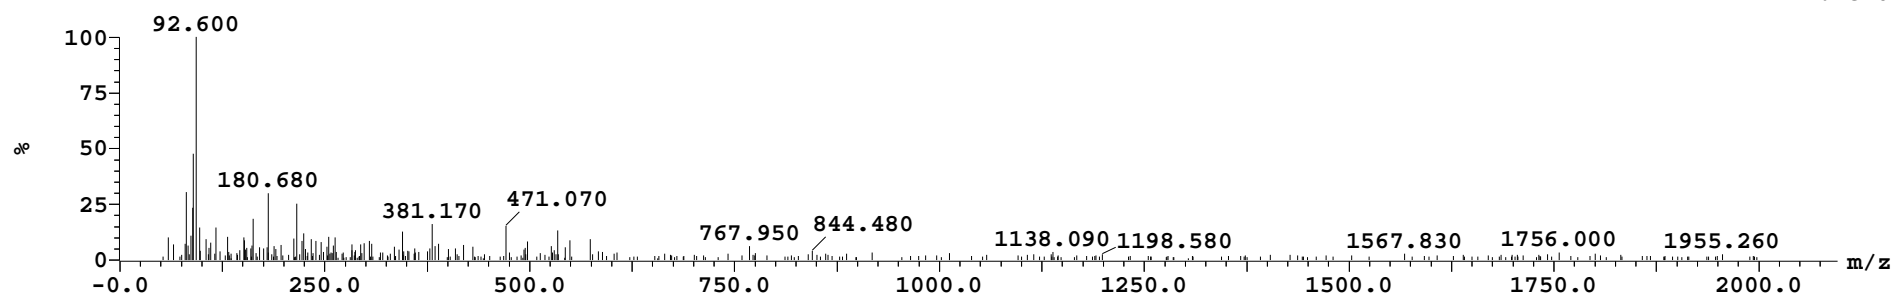

**Openlynx Report -**

Sample: 643

File:LK-2

Description:Default file

Vial:1:B,4

Date:03-Aug-2023

ID:

Time:12:54:05

Page 13

Printed: Thu Aug 03 15:05:03 2023

**Sample Report (continued):**

| Peak ID | Compound | Time | Mass Found |
|---------|----------|------|------------|
|---------|----------|------|------------|

|    |  |       |  |
|----|--|-------|--|
| 21 |  | 12.07 |  |
|----|--|-------|--|

21: (Time: 12.07)

1:MS ES-  
4.7e+004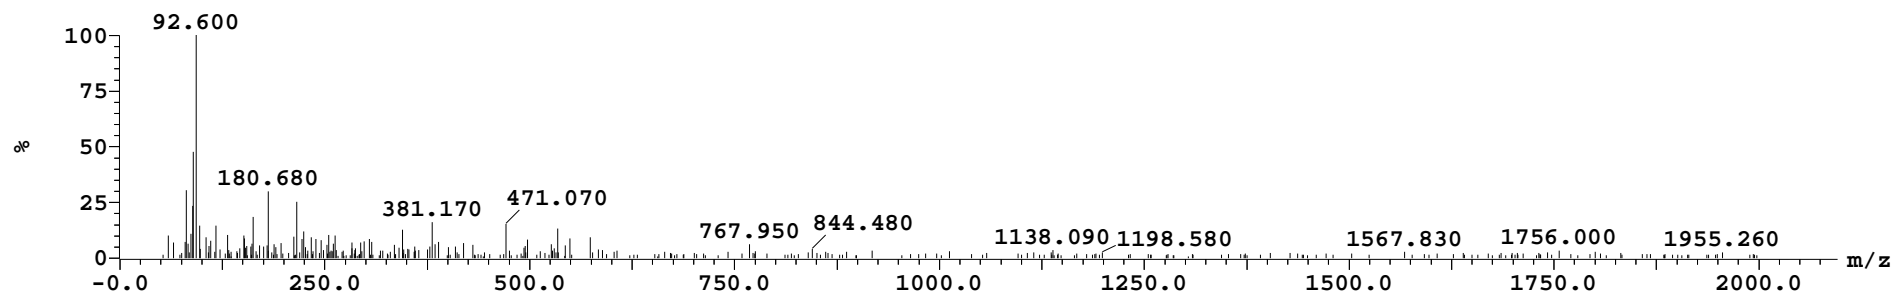

| Peak ID | Compound | Time | Mass Found |
|---------|----------|------|------------|
|---------|----------|------|------------|

|    |  |       |  |
|----|--|-------|--|
| 23 |  | 13.03 |  |
|----|--|-------|--|

23: (Time: 13.03)

1:MS ES-  
6.7e+004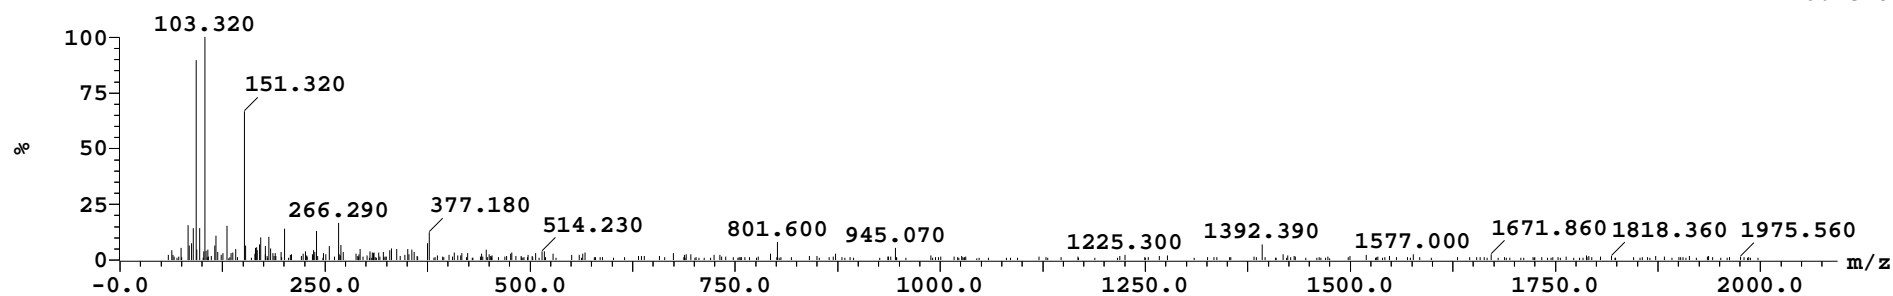

**Openlynx Report -**

Sample: 643

File:LK-2

Description:Default file

Vial:1:B,4

Date:03-Aug-2023

ID:

Time:12:54:05

Page 14

Printed: Thu Aug 03 15:05:03 2023

**Sample Report (continued):**

| Peak ID | Compound | Time  | Mass Found |
|---------|----------|-------|------------|
| 24      |          | 14.35 |            |

24: (Time: 14.35)

1:MS ES-  
1.8e+006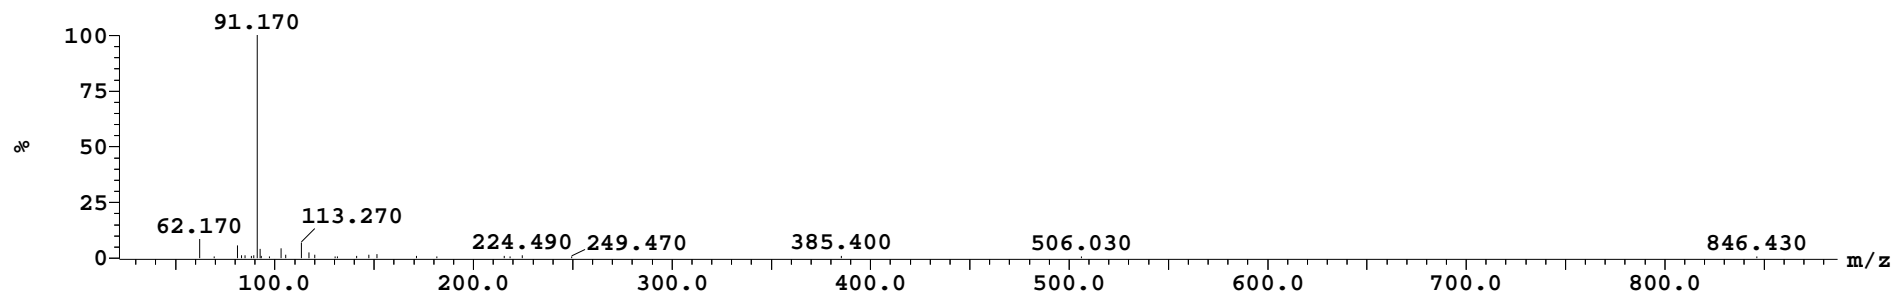

| Peak ID | Compound | Time  | Mass Found |
|---------|----------|-------|------------|
| 25      |          | 15.48 |            |

25: (Time: 15.48)

1:MS ES-  
7.6e+004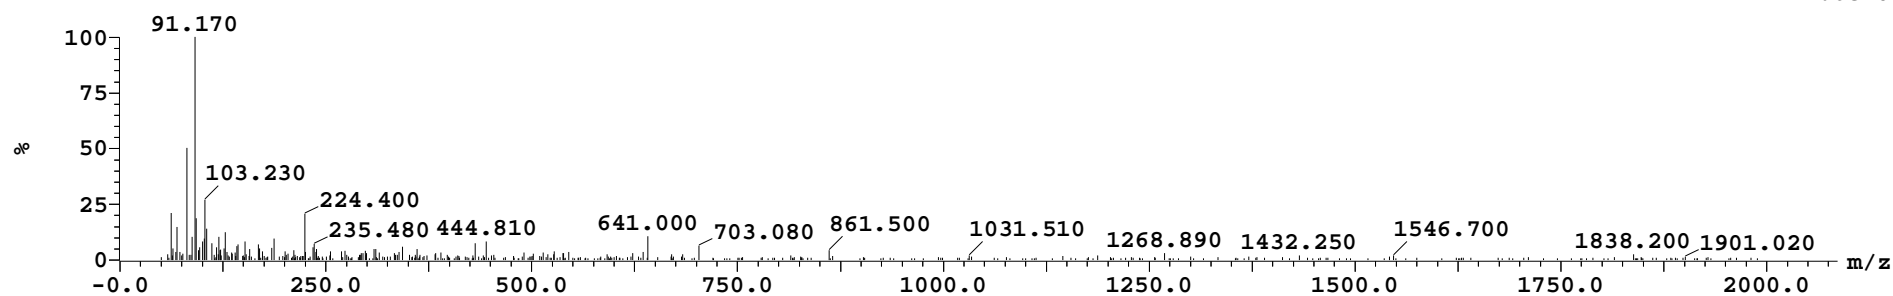

**Openlynx Report -**

Page 15

Sample: 643

Vial:1:B,4

ID:

File:LK-2

Date:03-Aug-2023

Time:12:54:05

Description:Default file

Printed: Thu Aug 03 15:05:03 2023

**Sample Report (continued):**

| Peak ID | Compound | Time | Mass Found |
|---------|----------|------|------------|
|---------|----------|------|------------|

|    |  |       |  |
|----|--|-------|--|
| 26 |  | 15.65 |  |
|----|--|-------|--|

26:(Time: 15.65)

1:MS ES-  
1.4e+006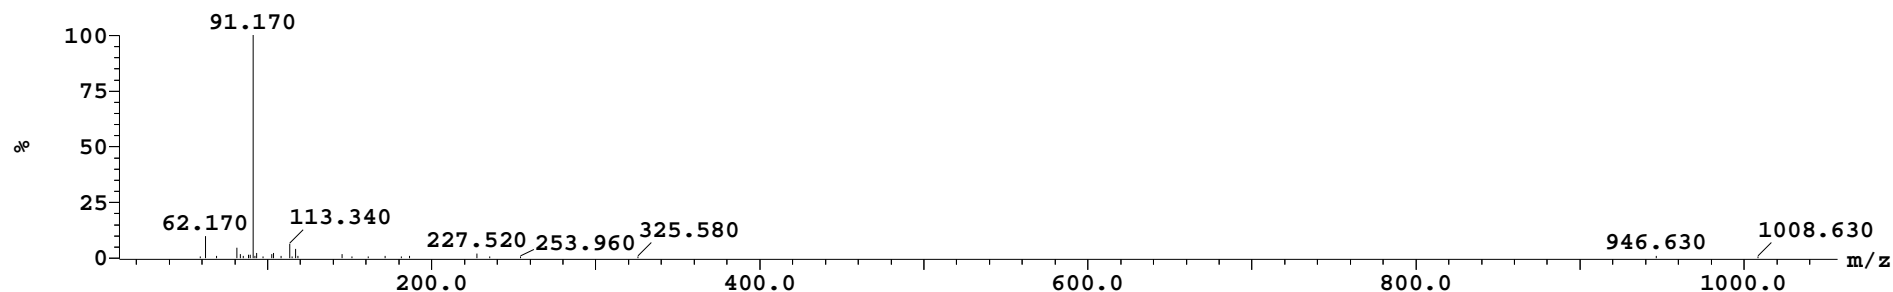

| Peak ID | Compound | Time | Mass Found |
|---------|----------|------|------------|
|---------|----------|------|------------|

|    |  |       |  |
|----|--|-------|--|
| 27 |  | 16.37 |  |
|----|--|-------|--|

27:(Time: 16.37)

1:MS ES-  
1.2e+005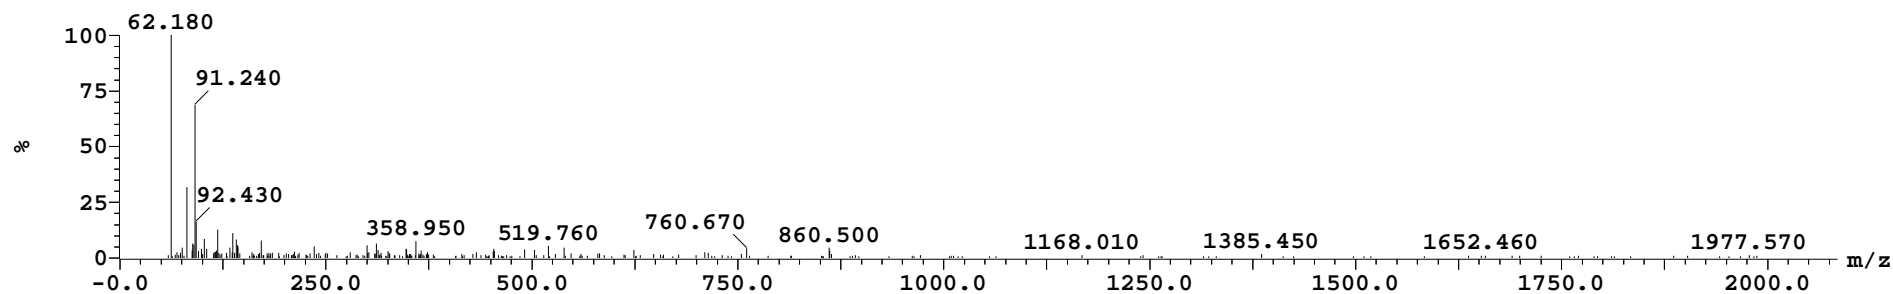



**Openlynx Report -**

Sample: 643  
File:LK-2  
Description:Default file

Vial:1:B,4  
Date:03-Aug-2023

ID:  
Time:12:54:05

Page 16

Printed: Thu Aug 03 15:05:03 2023

**Sample Report (continued):**

| Peak ID | Compound | Time | Mass Found |
|---------|----------|------|------------|
|---------|----------|------|------------|

|    |  |       |  |
|----|--|-------|--|
| 29 |  | 16.88 |  |
|----|--|-------|--|

29:(Time: 16.88)

1:MS ES-  
2.3e+005

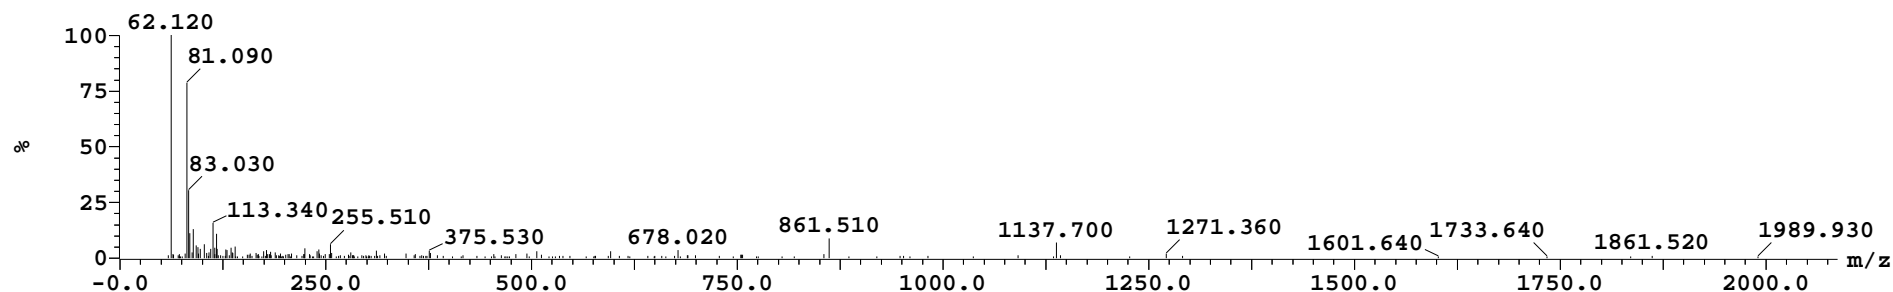

| Peak ID | Compound | Time | Mass Found |
|---------|----------|------|------------|
|---------|----------|------|------------|

|    |  |       |  |
|----|--|-------|--|
| 30 |  | 17.20 |  |
|----|--|-------|--|

30:(Time: 17.20)

1:MS ES-  
9.4e+004

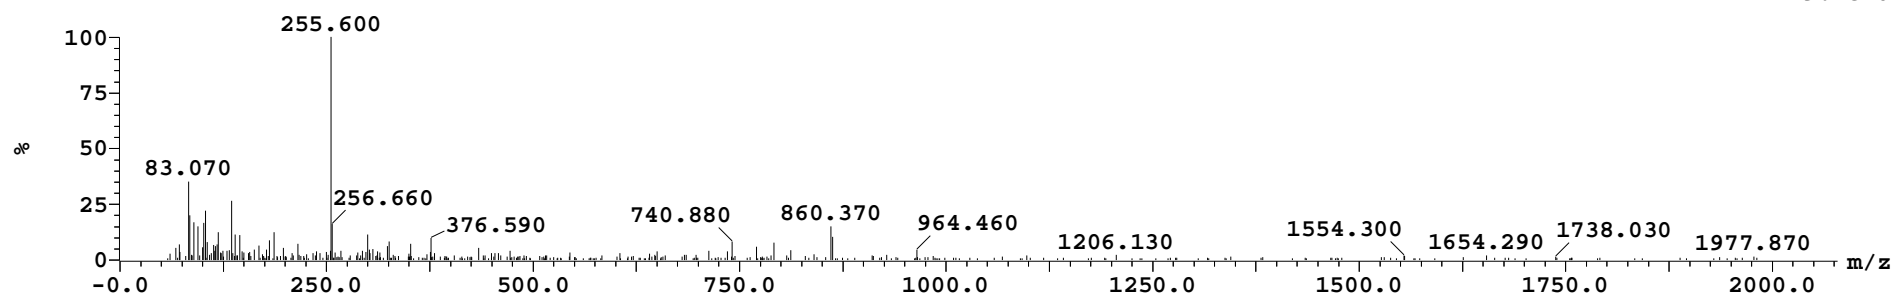

**Openlynx Report -**

Sample: 643

File:LK-2

Description:Default file

Vial:1:B,4

Date:03-Aug-2023

ID:

Time:12:54:05

Page 17

Printed: Thu Aug 03 15:05:03 2023

**Sample Report (continued):**

| Peak ID | Compound | Time | Mass Found |
|---------|----------|------|------------|
|---------|----------|------|------------|

|    |  |       |  |
|----|--|-------|--|
| 31 |  | 21.39 |  |
|----|--|-------|--|

31: (Time: 21.39)

1:MS ES-  
2.5e+004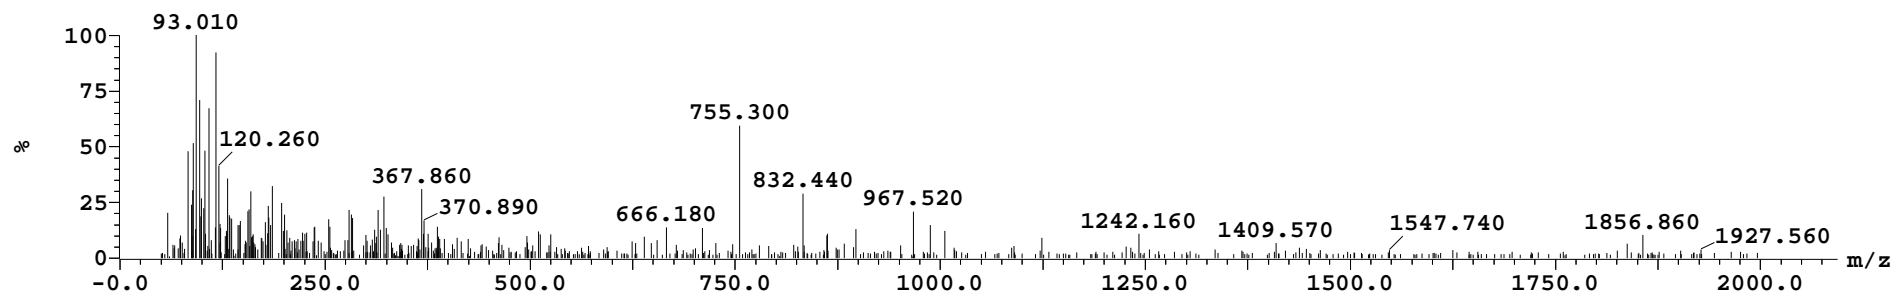

| Peak ID | Compound | Time | Mass Found |
|---------|----------|------|------------|
|---------|----------|------|------------|

|   |  |      |  |
|---|--|------|--|
| 1 |  | 0.10 |  |
|---|--|------|--|

1: (Time: 0.10)

2:MS ES+  
5.5e+007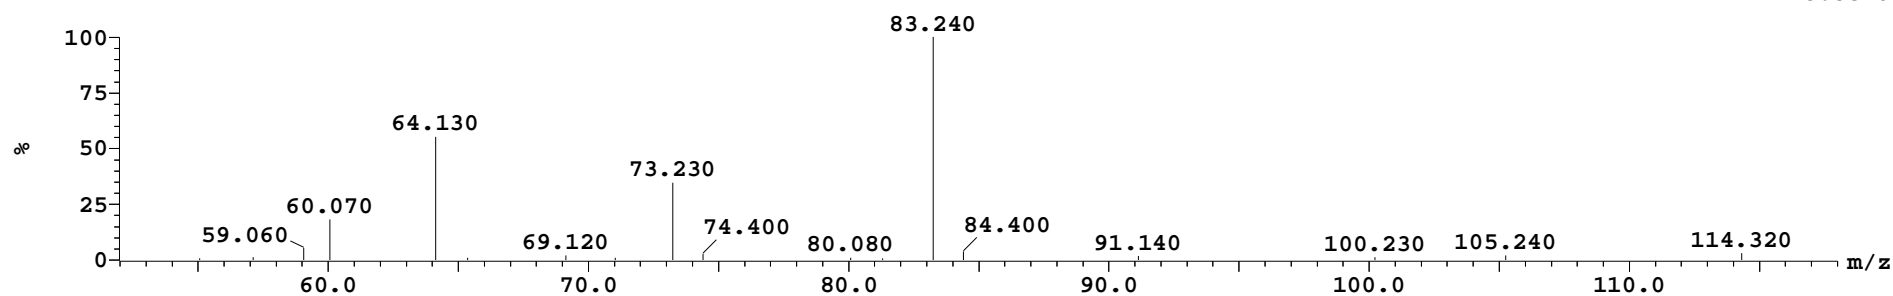

**Openlynx Report -**

Page 18

Sample: 643

Vial:1:B,4

ID:

File:LK-2

Date:03-Aug-2023

Time:12:54:05

Description:Default file

Printed: Thu Aug 03 15:05:03 2023

**Sample Report (continued):**

| Peak ID | Compound | Time | Mass Found |
|---------|----------|------|------------|
|---------|----------|------|------------|

2

0.27

2: (Time: 0.27)

2:MS ES+  
2.1e+006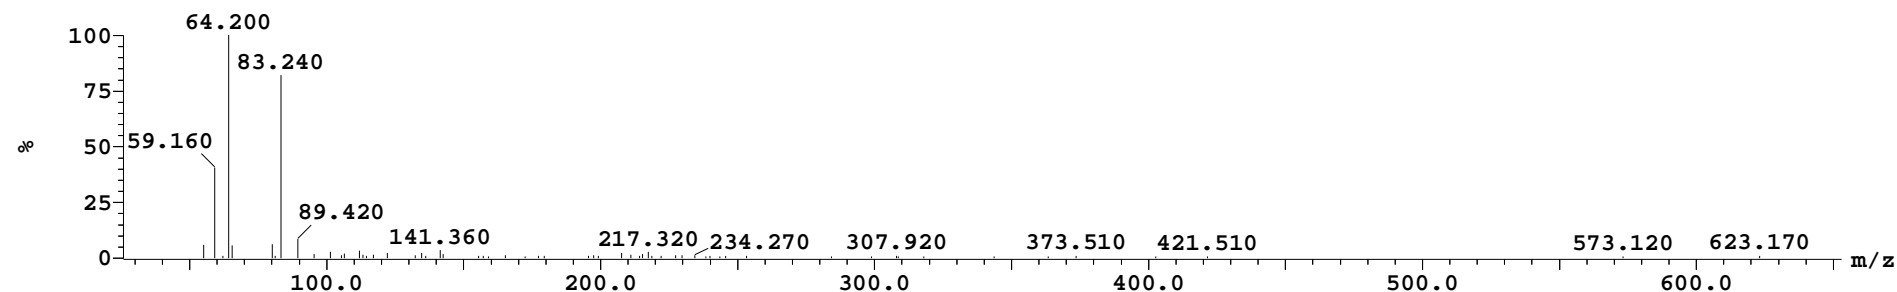

| Peak ID | Compound | Time | Mass Found |
|---------|----------|------|------------|
|---------|----------|------|------------|

3

0.53

3: (Time: 0.53)

2:MS ES+  
3.1e+007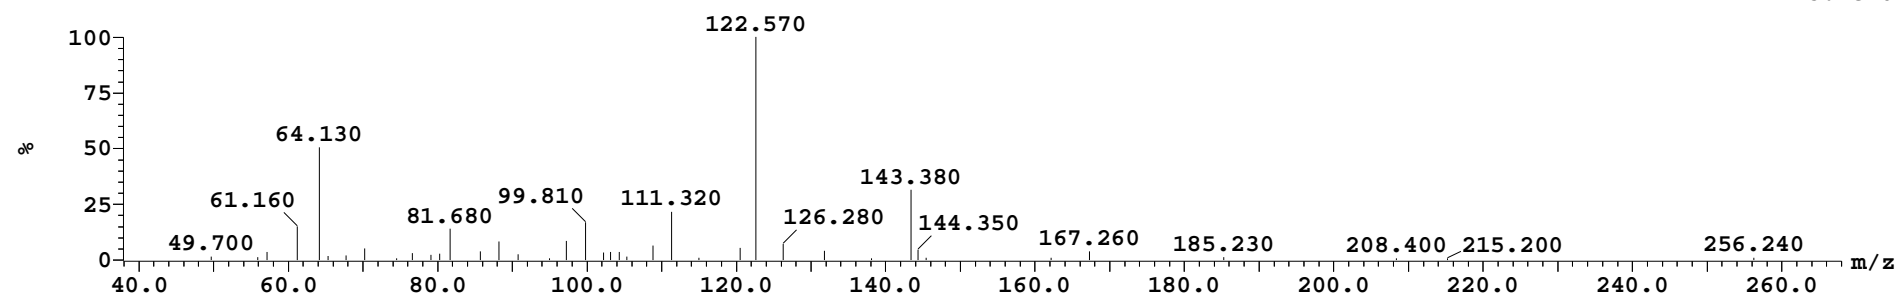

**Openlynx Report -**

Sample: 643

File:LK-2

Description:Default file

Vial:1:B,4

Date:03-Aug-2023

ID:

Time:12:54:05

Page 19

Printed: Thu Aug 03 15:05:03 2023

**Sample Report (continued):**

| Peak ID | Compound | Time | Mass Found |
|---------|----------|------|------------|
|---------|----------|------|------------|

4

1.08

4: (Time: 1.08)

2:MS ES+  
1.7e+006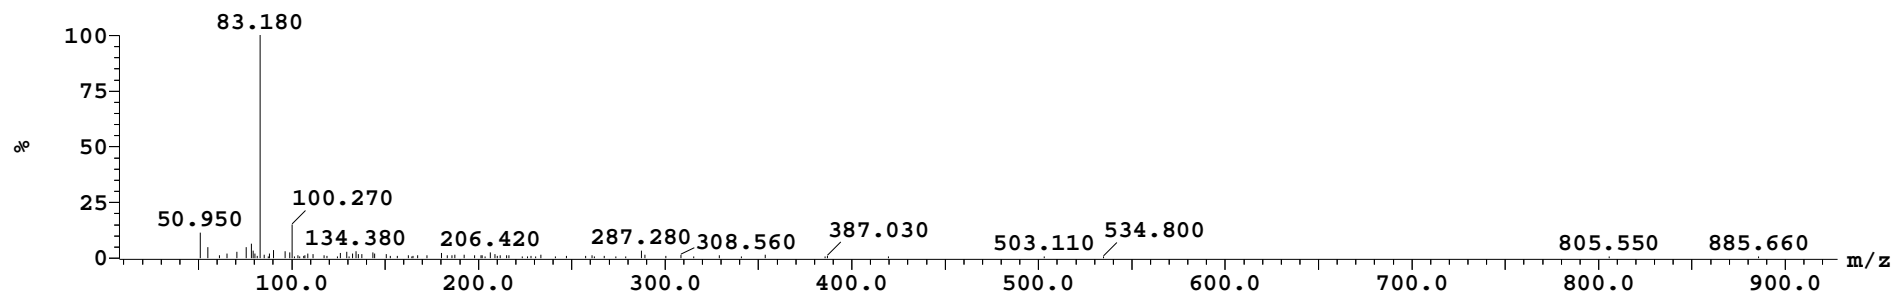

| Peak ID | Compound | Time | Mass Found |
|---------|----------|------|------------|
|---------|----------|------|------------|

5

1.10

5: (Time: 1.10)

2:MS ES+  
1.7e+006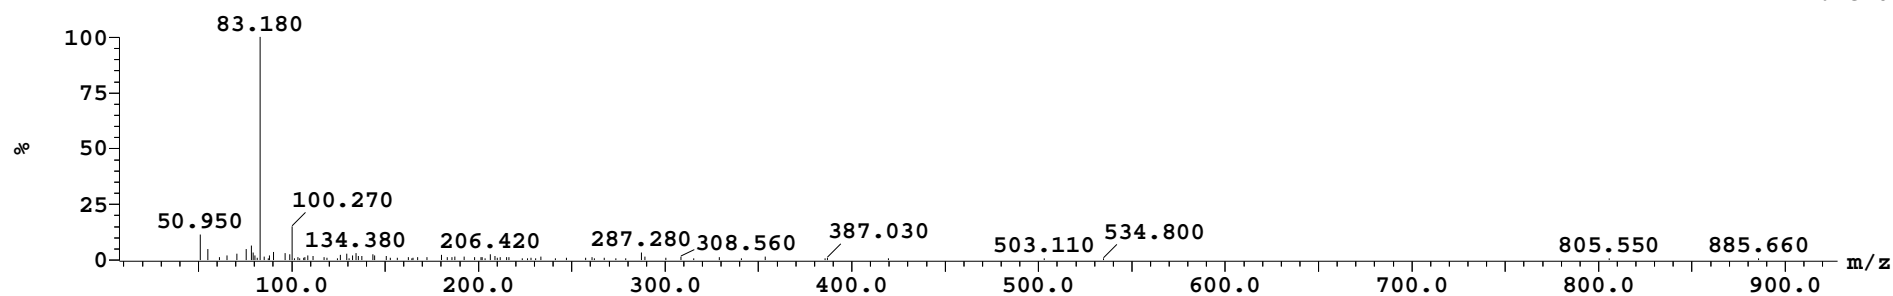

**Openlynx Report -**

Sample: 643  
File:LK-2  
Description:Default file

Vial:1:B,4  
Date:03-Aug-2023

ID:  
Time:12:54:05

Page 20

Printed: Thu Aug 03 15:05:03 2023

**Sample Report (continued):**

| Peak ID | Compound | Time | Mass Found |
|---------|----------|------|------------|
|---------|----------|------|------------|

8

4.22

8: (Time: 4.22)

2:MS ES+  
4.1e+005

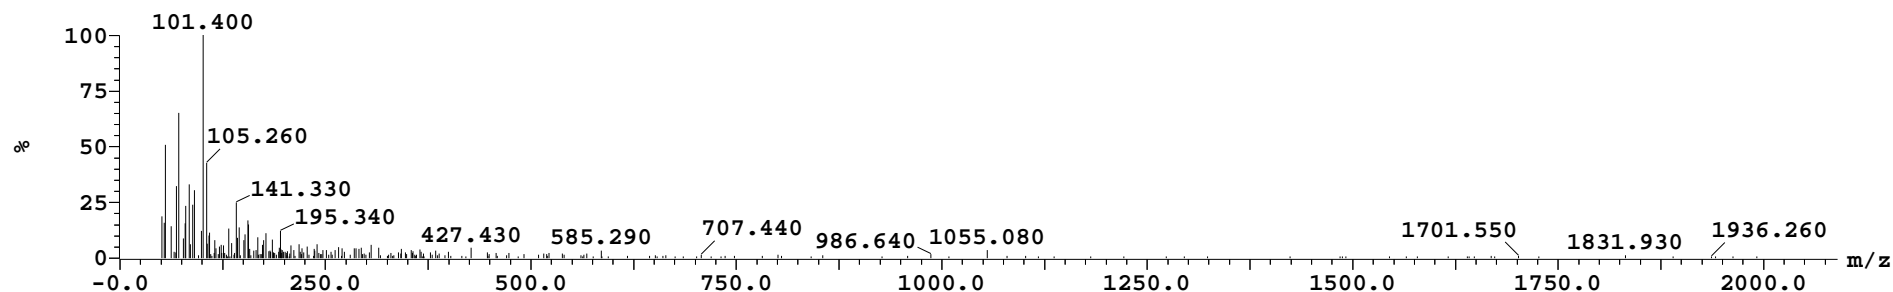

| Peak ID | Compound | Time | Mass Found |
|---------|----------|------|------------|
|---------|----------|------|------------|

9

5.78

9: (Time: 5.78)

2:MS ES+  
2.0e+006

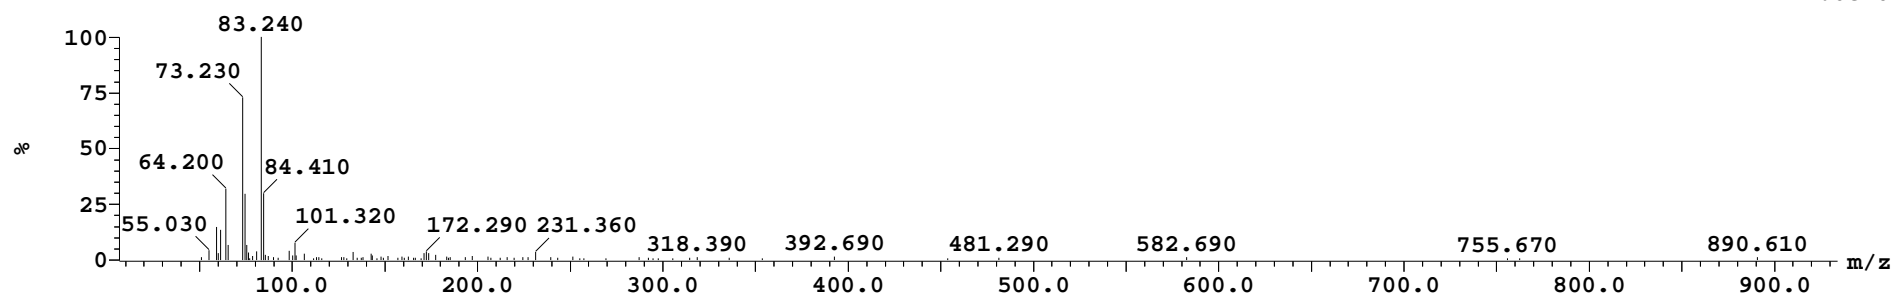

**Openlynx Report -**

Sample: 643  
File:LK-2  
Description:Default file

Vial:1:B,4  
Date:03-Aug-2023

ID:  
Time:12:54:05

Page 21

Printed: Thu Aug 03 15:05:03 2023

**Sample Report (continued):**

| Peak ID | Compound | Time | Mass Found |
|---------|----------|------|------------|
|---------|----------|------|------------|

|    |  |      |  |
|----|--|------|--|
| 11 |  | 6.53 |  |
|----|--|------|--|

11:(Time: 6.53)

2:MS ES+  
2.1e+006

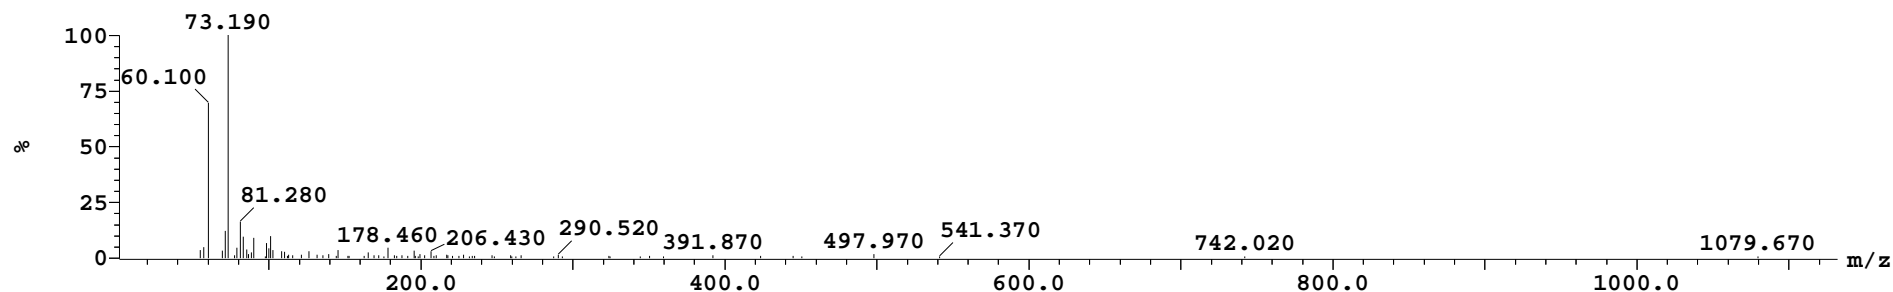

| Peak ID | Compound | Time | Mass Found |
|---------|----------|------|------------|
|---------|----------|------|------------|

|    |  |      |  |
|----|--|------|--|
| 12 |  | 8.42 |  |
|----|--|------|--|

12:(Time: 8.42)

2:MS ES+  
1.0e+008

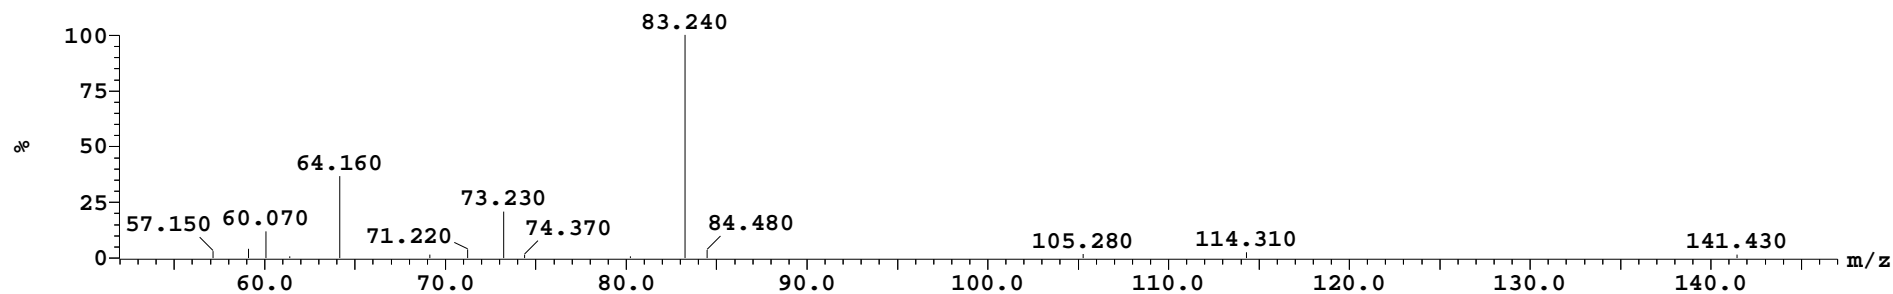

**Openlynx Report -**

Page 22

Sample: 643

Vial:1:B,4

ID:

File:LK-2

Date:03-Aug-2023

Time:12:54:05

Description:Default file

Printed: Thu Aug 03 15:05:03 2023

**Sample Report (continued):**

| Peak ID | Compound | Time | Mass Found |
|---------|----------|------|------------|
| 13      |          | 8.67 |            |

13: (Time: 8.67)

2:MS ES+  
5.8e+006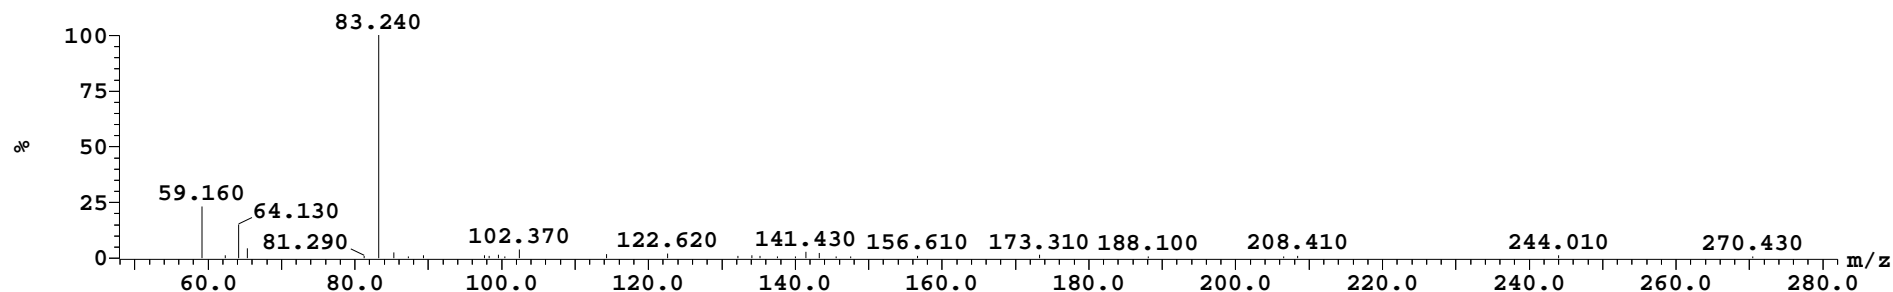

| Peak ID | Compound | Time | Mass Found |
|---------|----------|------|------------|
| 14      |          | 8.67 |            |

14: (Time: 8.67)

2:MS ES+  
5.8e+006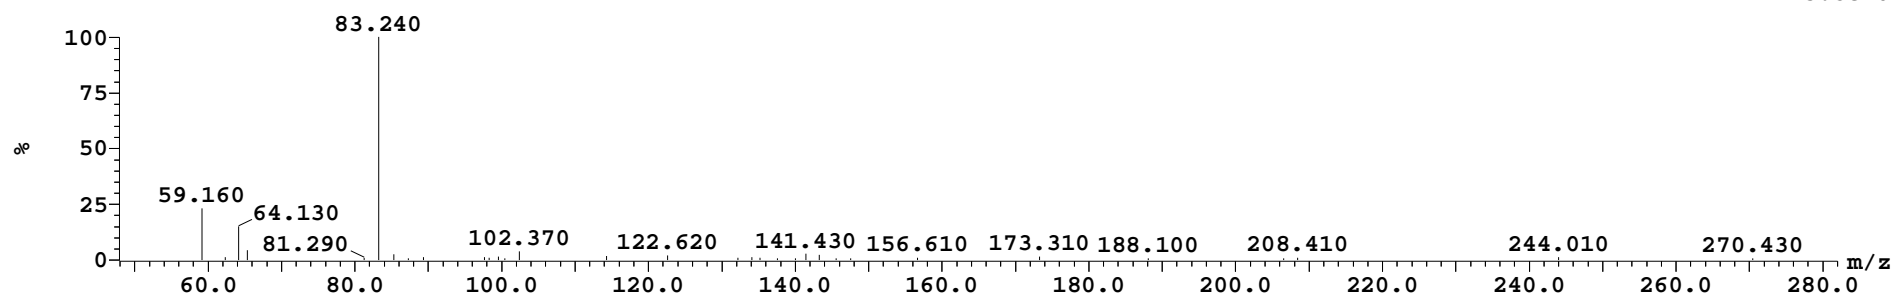

**Openlynx Report -**

Sample: 643  
File:LK-2  
Description:Default file

Vial:1:B,4  
Date:03-Aug-2023

ID:  
Time:12:54:05

Page 23

Printed: Thu Aug 03 15:05:03 2023

**Sample Report (continued):**

| Peak ID | Compound | Time | Mass Found |
|---------|----------|------|------------|
|---------|----------|------|------------|

|    |  |      |  |
|----|--|------|--|
| 15 |  | 9.13 |  |
|----|--|------|--|

15: (Time: 9.13)

2:MS ES+  
3.9e+005

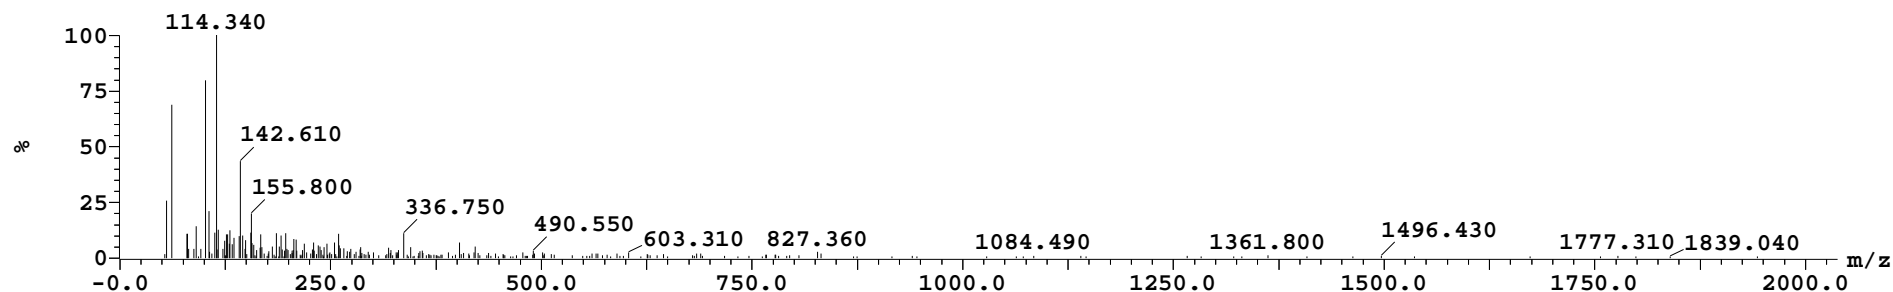

| Peak ID | Compound | Time | Mass Found |
|---------|----------|------|------------|
|---------|----------|------|------------|

|    |  |      |  |
|----|--|------|--|
| 16 |  | 9.77 |  |
|----|--|------|--|

16: (Time: 9.77)

2:MS ES+  
1.1e+006

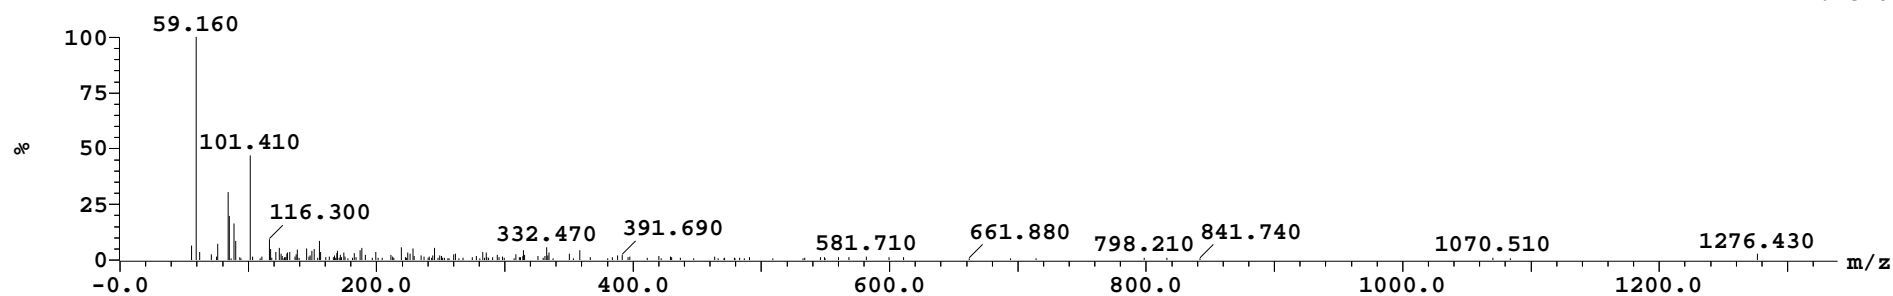



**Openlynx Report -**

Sample: 643

File:LK-2

Description:Default file

Vial:1:B,4

Date:03-Aug-2023

ID:

Time:12:54:05

Page 24

Printed: Thu Aug 03 15:05:03 2023

**Sample Report (continued):**

| Peak ID | Compound | Time | Mass Found |
|---------|----------|------|------------|
|---------|----------|------|------------|

|    |  |       |  |
|----|--|-------|--|
| 17 |  | 10.53 |  |
|----|--|-------|--|

17:(Time: 10.53)

2:MS ES+  
9.2e+005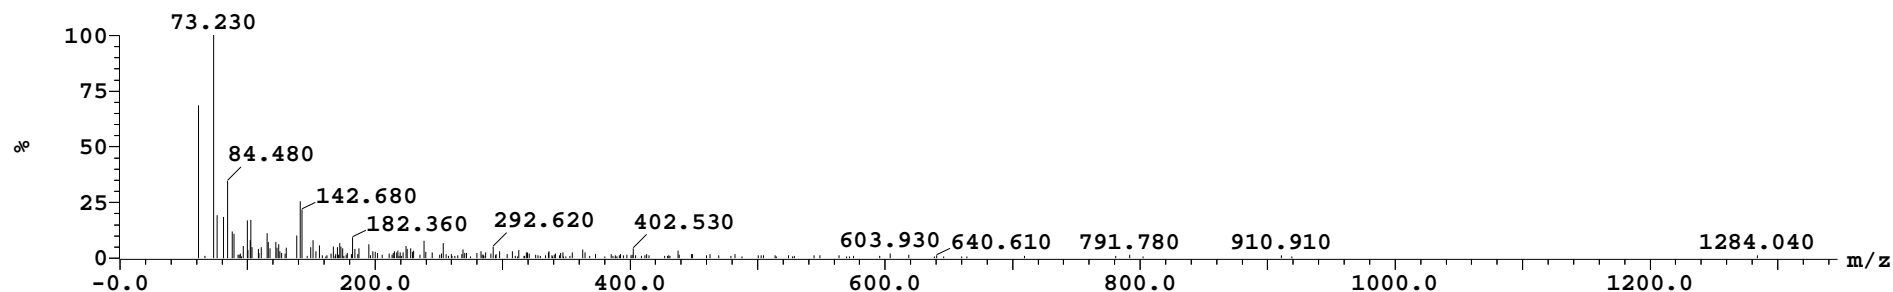

| Peak ID | Compound | Time | Mass Found |
|---------|----------|------|------------|
|---------|----------|------|------------|

|    |  |       |  |
|----|--|-------|--|
| 18 |  | 11.17 |  |
|----|--|-------|--|

18:(Time: 11.17)

2:MS ES+  
3.2e+006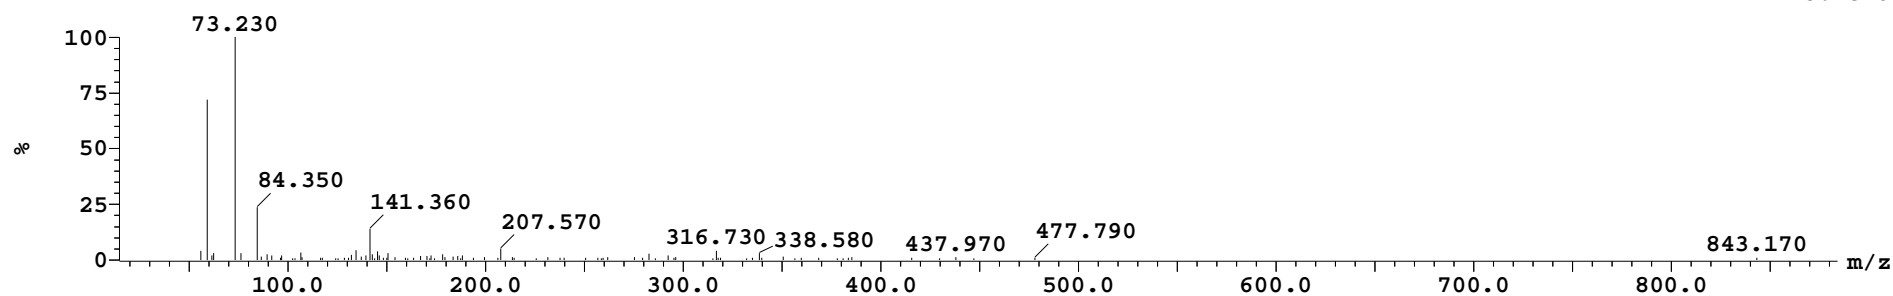

**Openlynx Report -**

Page 25

Sample: 643

Vial:1:B,4

ID:

File:LK-2

Date:03-Aug-2023

Time:12:54:05

Description:Default file

Printed: Thu Aug 03 15:05:03 2023

**Sample Report (continued):**

| Peak ID | Compound | Time | Mass Found |
|---------|----------|------|------------|
|---------|----------|------|------------|

|    |  |       |  |
|----|--|-------|--|
| 19 |  | 11.30 |  |
|----|--|-------|--|

19: (Time: 11.30)

2:MS ES+  
1.2e+008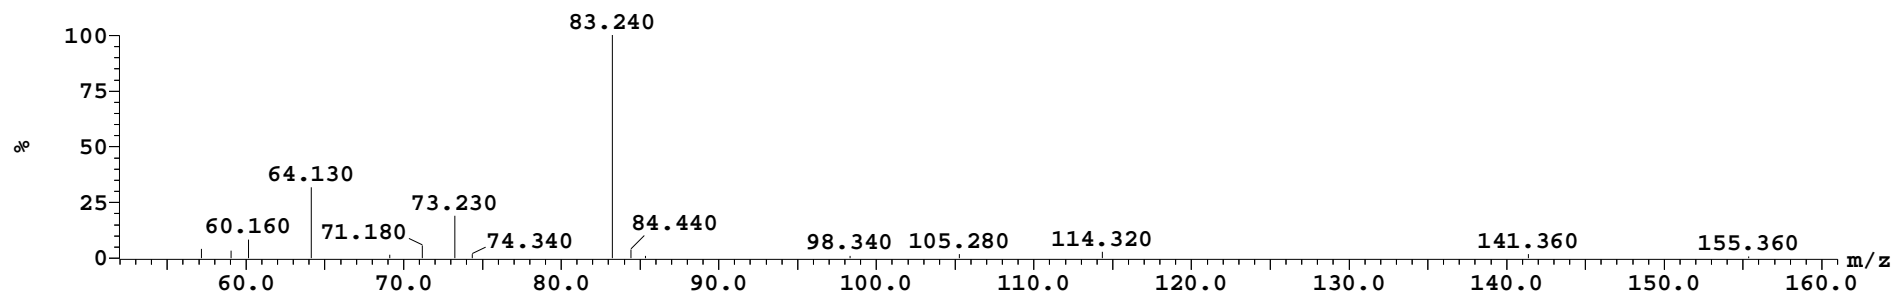

| Peak ID | Compound | Time | Mass Found |
|---------|----------|------|------------|
|---------|----------|------|------------|

|    |  |       |  |
|----|--|-------|--|
| 20 |  | 12.07 |  |
|----|--|-------|--|

20: (Time: 12.07)

2:MS ES+  
8.3e+006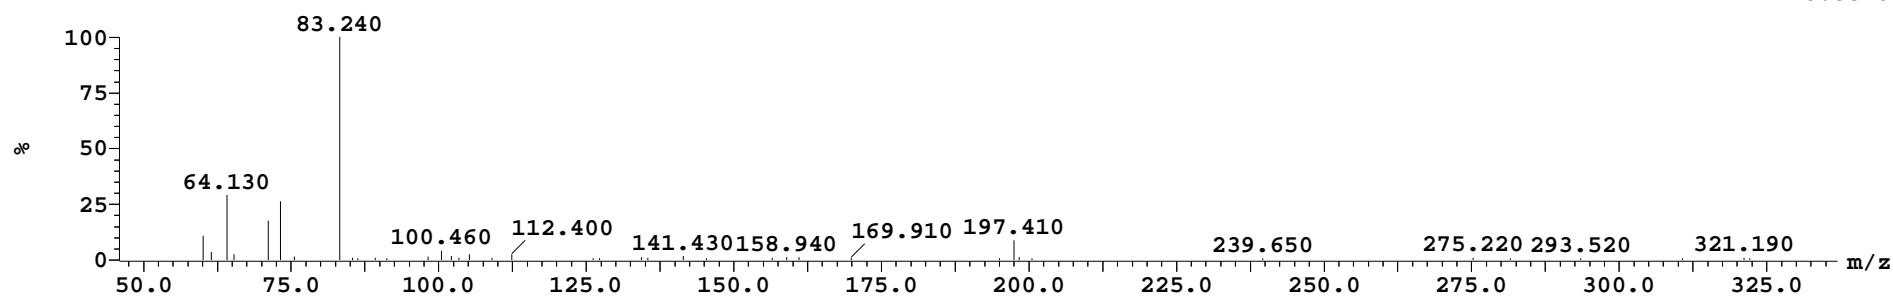

**Openlynx Report -**

Sample: 643

File:LK-2

Description:Default file

Vial:1:B,4

Date:03-Aug-2023

ID:

Time:12:54:05

Page 26

Printed: Thu Aug 03 15:05:03 2023

**Sample Report (continued):**

| Peak ID | Compound | Time | Mass Found |
|---------|----------|------|------------|
|---------|----------|------|------------|

|    |  |       |  |
|----|--|-------|--|
| 21 |  | 12.07 |  |
|----|--|-------|--|

21:(Time: 12.07)

2:MS ES+  
8.3e+006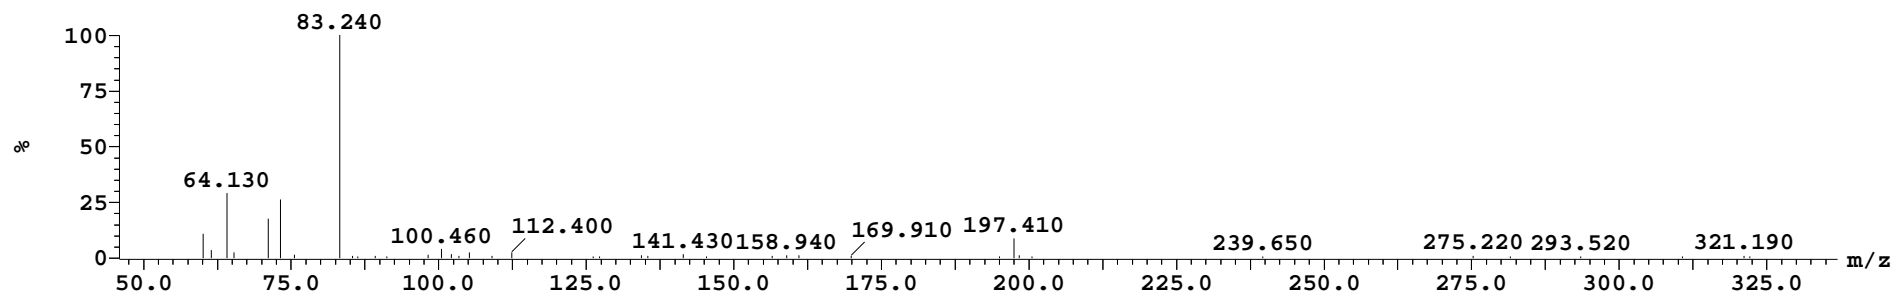

| Peak ID | Compound | Time | Mass Found |
|---------|----------|------|------------|
|---------|----------|------|------------|

|    |  |       |  |
|----|--|-------|--|
| 22 |  | 12.36 |  |
|----|--|-------|--|

22:(Time: 12.36)

2:MS ES+  
6.7e+006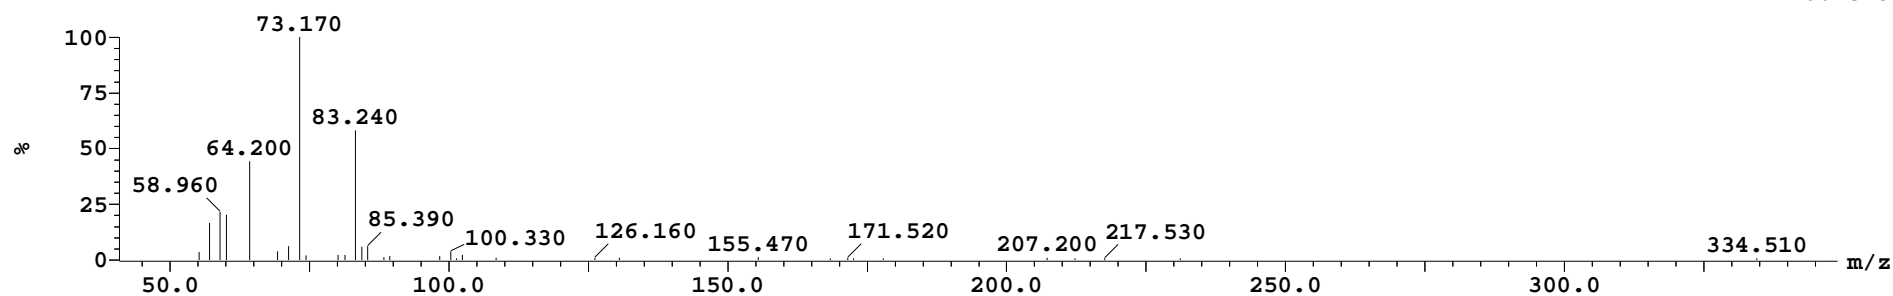

**Openlynx Report -**

Sample: 643  
File:LK-2  
Description:Default file

Vial:1:B,4  
Date:03-Aug-2023

ID:  
Time:12:54:05

Page 27

Printed: Thu Aug 03 15:05:03 2023

**Sample Report (continued):**

| Peak ID | Compound | Time | Mass Found |
|---------|----------|------|------------|
|---------|----------|------|------------|

|    |  |       |  |
|----|--|-------|--|
| 23 |  | 13.03 |  |
|----|--|-------|--|

23:(Time: 13.03)

2:MS ES+  
6.3e+006

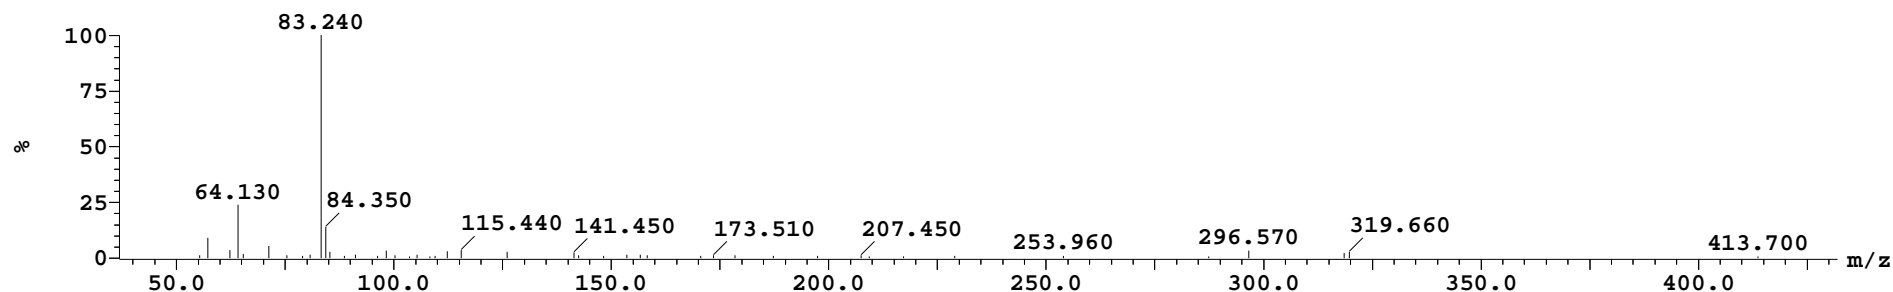

| Peak ID | Compound | Time | Mass Found |
|---------|----------|------|------------|
|---------|----------|------|------------|

|    |  |       |  |
|----|--|-------|--|
| 24 |  | 14.35 |  |
|----|--|-------|--|

24:(Time: 14.35)

2:MS ES+  
1.1e+006

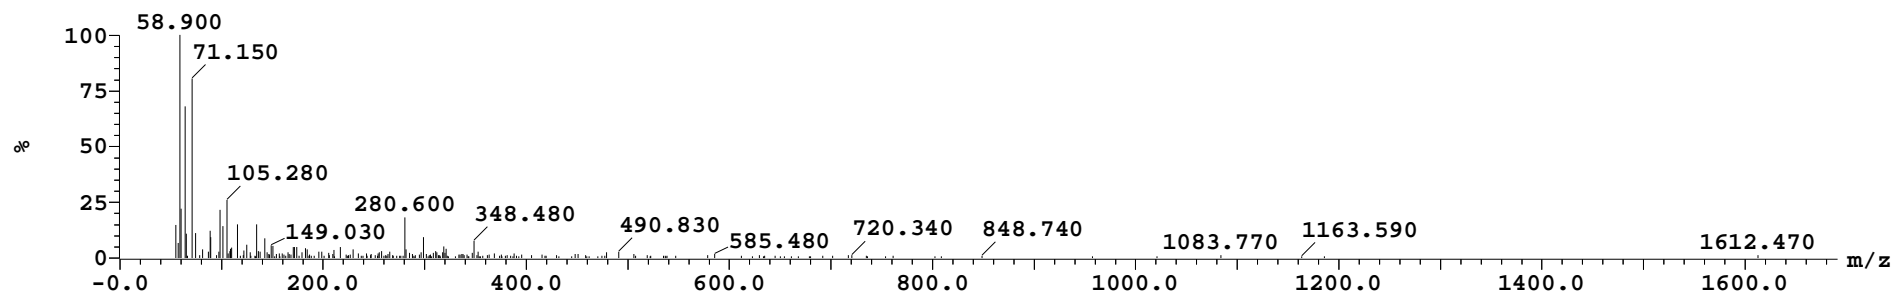

**Openlynx Report -**

Sample: 643

File:LK-2

Description:Default file

Vial:1:B,4

Date:03-Aug-2023

ID:

Time:12:54:05

Page 28

Printed: Thu Aug 03 15:05:03 2023

**Sample Report (continued):**

| Peak ID | Compound | Time | Mass Found |
|---------|----------|------|------------|
|---------|----------|------|------------|

|    |  |       |  |
|----|--|-------|--|
| 25 |  | 15.48 |  |
|----|--|-------|--|

25:(Time: 15.48)

2:MS ES+  
7.6e+007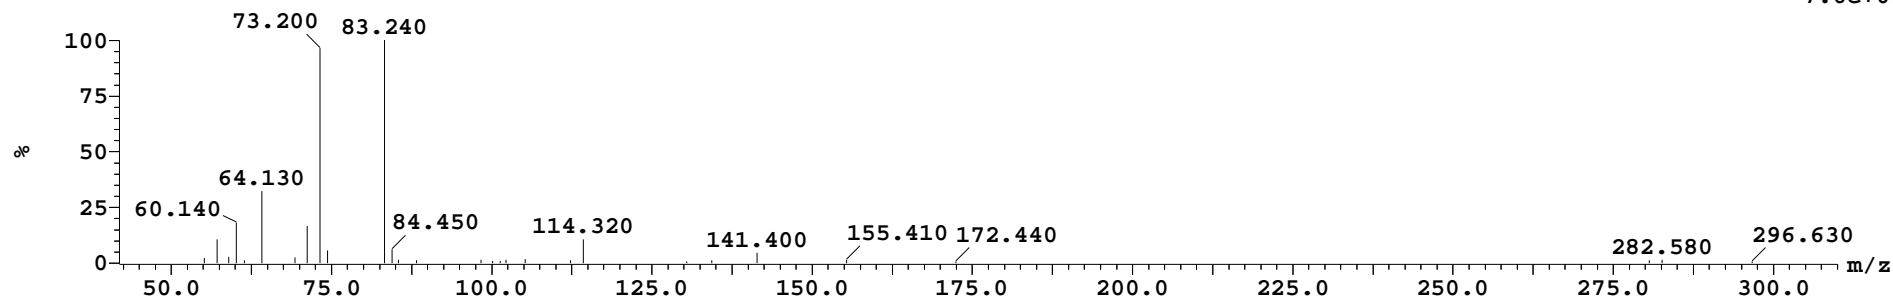

| Peak ID | Compound | Time | Mass Found |
|---------|----------|------|------------|
|---------|----------|------|------------|

|    |  |       |  |
|----|--|-------|--|
| 26 |  | 15.65 |  |
|----|--|-------|--|

26:(Time: 15.65)

2:MS ES+  
4.4e+006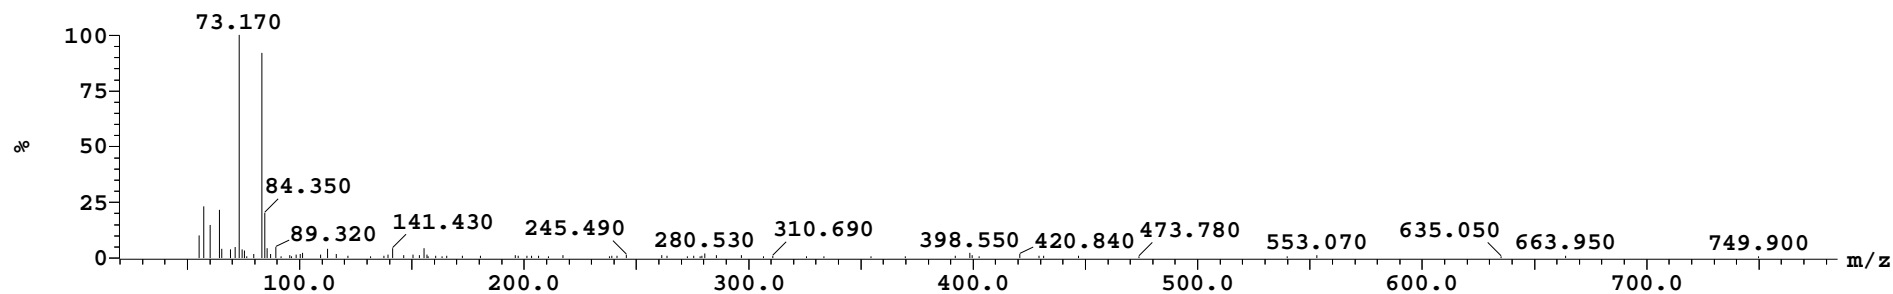

**Openlynx Report -**

Sample: 643

File:LK-2

Description:Default file

Vial:1:B,4

Date:03-Aug-2023

ID:

Time:12:54:05

Page 29

Printed: Thu Aug 03 15:05:03 2023

**Sample Report (continued):**

| Peak ID | Compound | Time | Mass Found |
|---------|----------|------|------------|
|---------|----------|------|------------|

|    |  |       |  |
|----|--|-------|--|
| 27 |  | 16.37 |  |
|----|--|-------|--|

27:(Time: 16.37)

2:MS ES+  
1.5e+007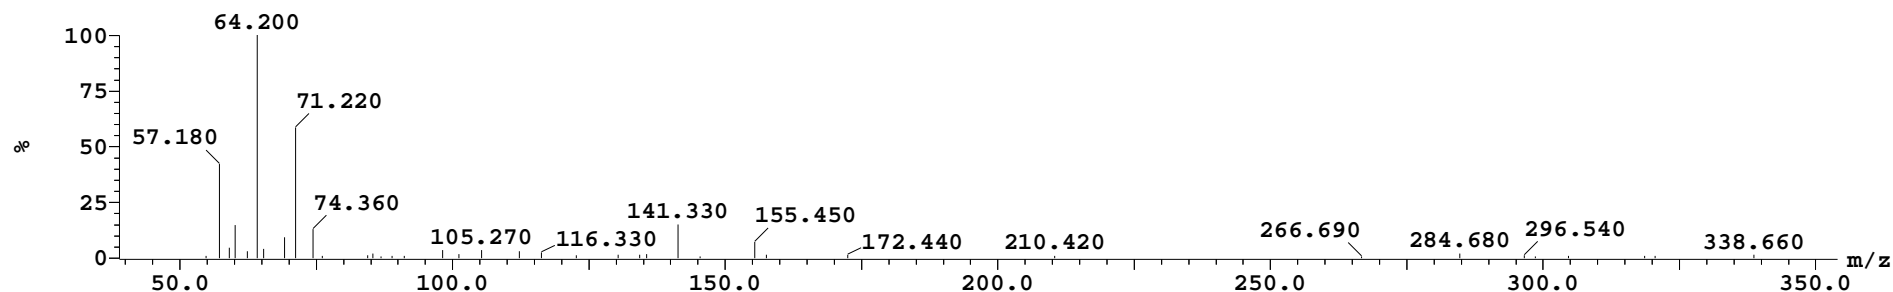

| Peak ID | Compound | Time | Mass Found |
|---------|----------|------|------------|
|---------|----------|------|------------|

|    |  |       |  |
|----|--|-------|--|
| 28 |  | 16.48 |  |
|----|--|-------|--|

28:(Time: 16.48)

2:MS ES+  
1.3e+007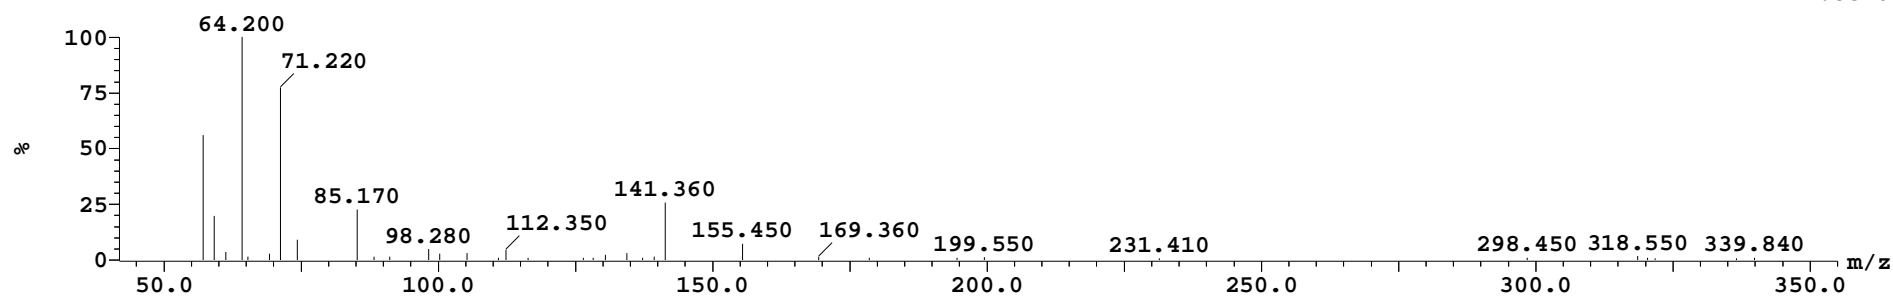

**Openlynx Report -**

Page 30

Sample: 643

Vial:1:B,4

ID:

File:LK-2

Date:03-Aug-2023

Time:12:54:05

Description:Default file

Printed: Thu Aug 03 15:05:03 2023

**Sample Report (continued):**

| Peak ID | Compound | Time | Mass Found |
|---------|----------|------|------------|
|---------|----------|------|------------|

|    |  |       |  |
|----|--|-------|--|
| 29 |  | 16.88 |  |
|----|--|-------|--|

29: (Time: 16.88)

2:MS ES+  
5.9e+006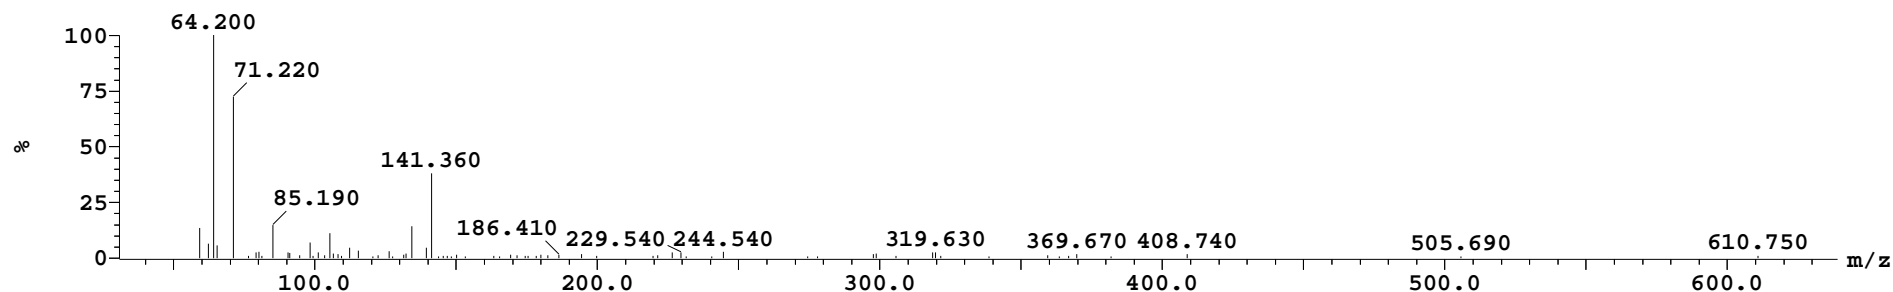

| Peak ID | Compound | Time | Mass Found |
|---------|----------|------|------------|
|---------|----------|------|------------|

|    |  |       |  |
|----|--|-------|--|
| 30 |  | 17.20 |  |
|----|--|-------|--|

30: (Time: 17.20)

2:MS ES+  
8.9e+007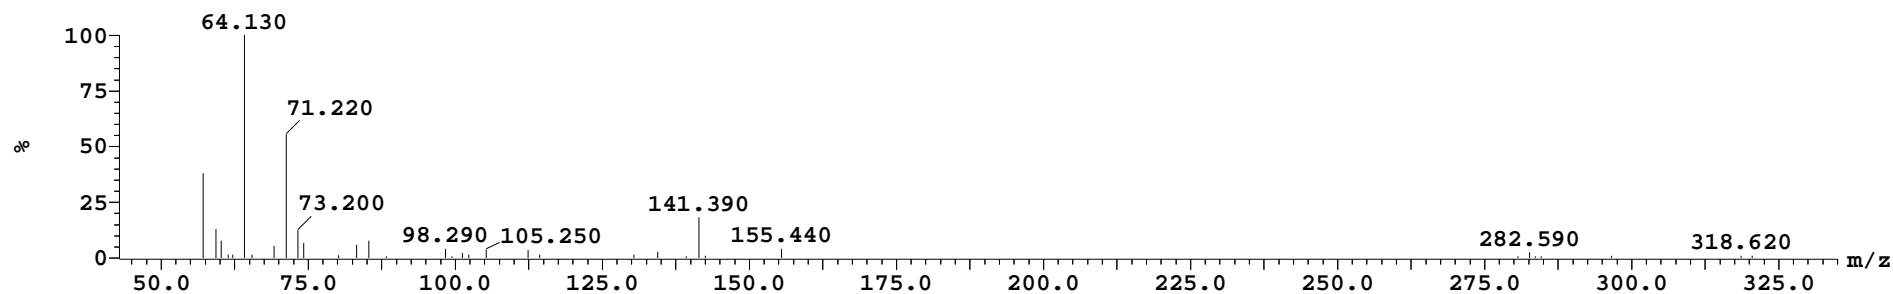

Openlynx Report -

Sample: 643  
File:LK-2  
Description:Default file

Vial:1:B,4  
Date:03-Aug-2023

ID:  
Time:12:54:05

Printed: Thu Aug 03 15:05:03 2023

Sample Report (continued):

| Peak ID | Compound | Time  | Mass Found |
|---------|----------|-------|------------|
| 32      |          | 21.77 |            |

32:(Time: 21.77)

2:MS ES+  
3.8e+007

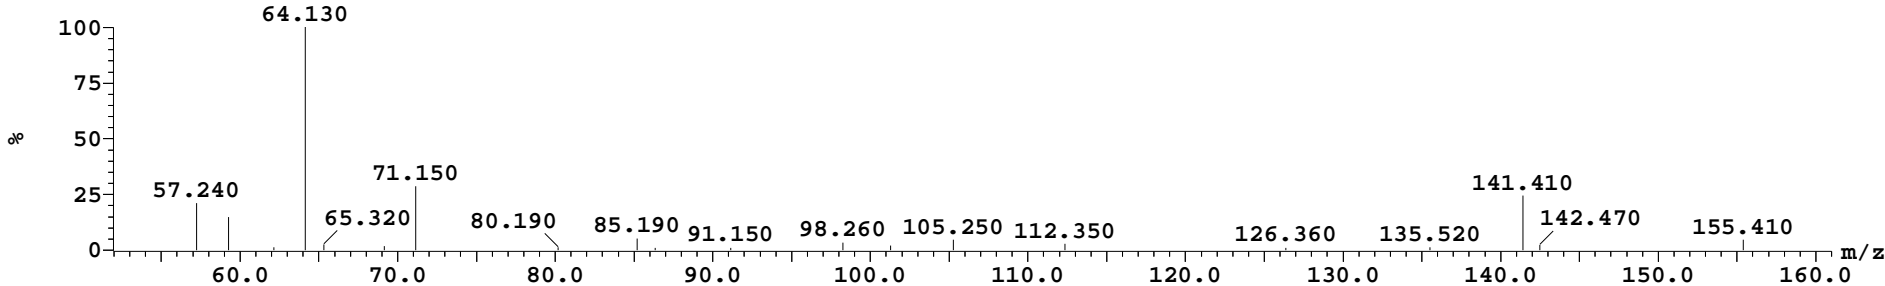



**Openlynx Report -**

Sample: 644  
File:LK-3  
Description:Default file

Vial:1:B,5  
Date:03-Aug-2023

ID:  
Time:13:20:09

Page 1

Printed: Thu Aug 03 15:05:46 2023

**Sample Report:**

Sample 644 Vial 1:B,5 ID File LK-3 Date 03-Aug-2023 Time 13:20:09 Description Default file

1: MS ES- :TIC

5.6e+006

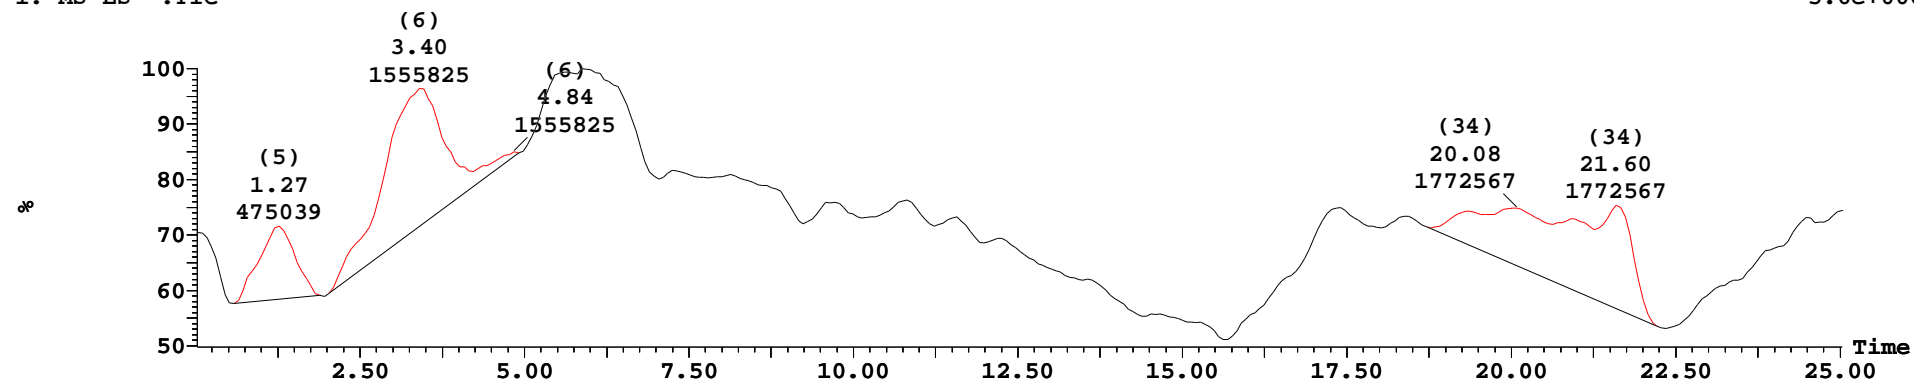

| Peak Number | Compound | Time  | AreaAbs | Area %Total | Width | Height | Mass Found |
|-------------|----------|-------|---------|-------------|-------|--------|------------|
| 5           |          | 1.27  | 5e+005  | 12.49       | 1     | 7e+005 |            |
| 6           |          | 3.40  | 2e+006  | 40.91       | 3     | 1e+006 |            |
| 34          |          | 21.60 | 2e+006  | 46.60       | 4     | 1e+006 |            |

2: MS ES+ :TIC

3.0e+008

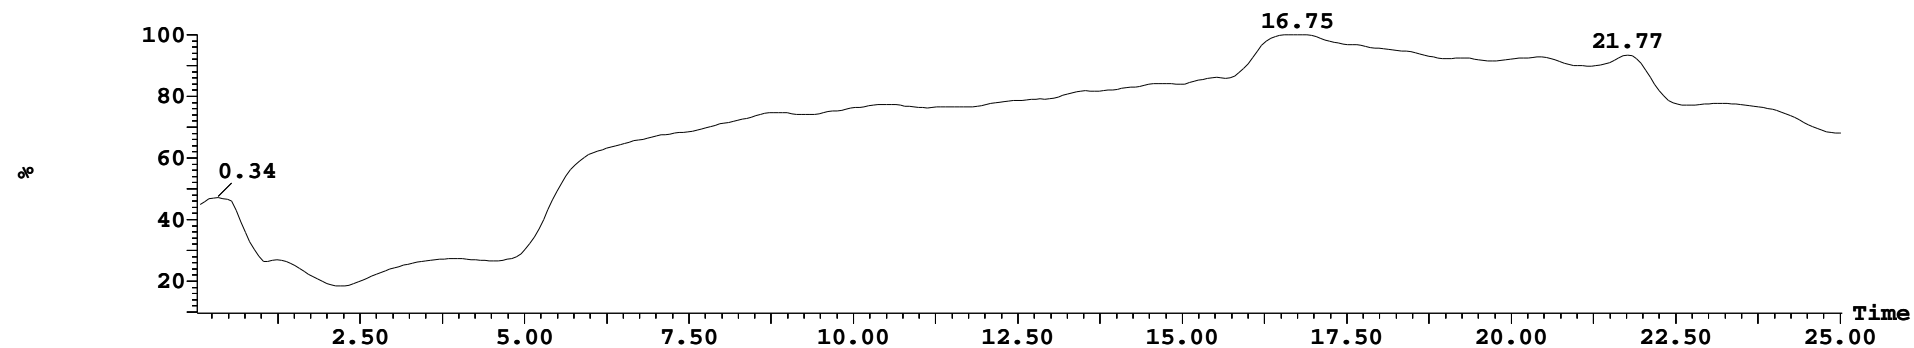

| Peak Number | Compound | Time | AreaAbs | Area %Total | Width | Height | Mass Found |
|-------------|----------|------|---------|-------------|-------|--------|------------|
|-------------|----------|------|---------|-------------|-------|--------|------------|

# Openlynx Report -

Sample: 644  
File: LK-3  
Description: Default file

Vial: 1:B,5  
Date: 03-Aug-2023

ID:  
Time: 13:20:09

Page 2

Printed: Thu Aug 03 15:05:46 2023

## Sample Report (continued):

3: UV Detector: 214

5.591e-2  
Range: 9.466e-2

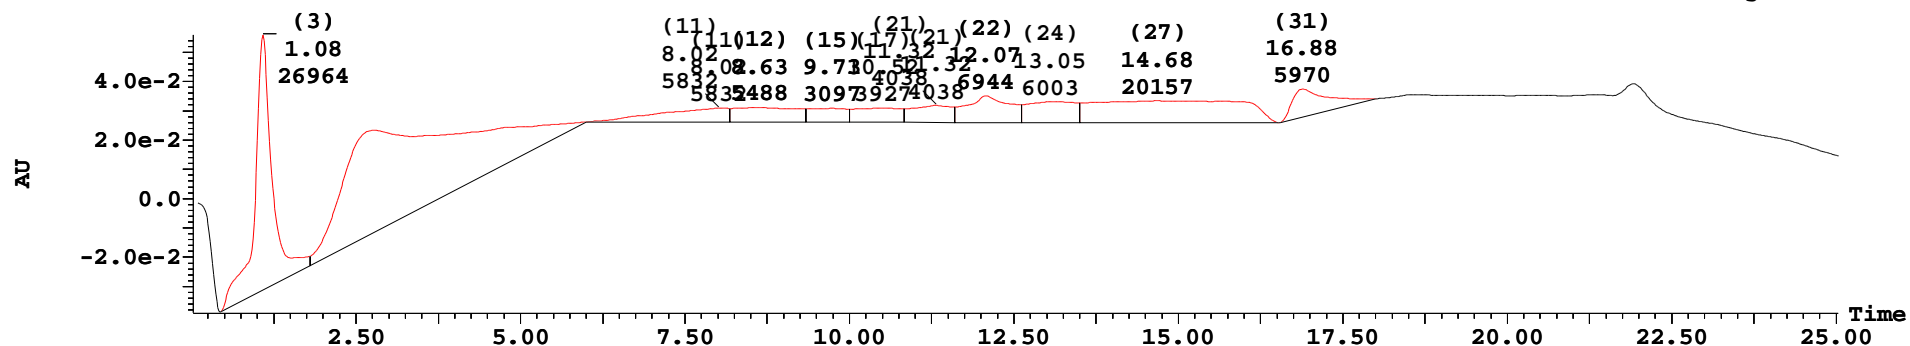

| Peak Number | Compound | Time  | AreaAbs | Area %Total | Width | Height | Mass Found |
|-------------|----------|-------|---------|-------------|-------|--------|------------|
| 3           |          | 1.08  | 3e+004  | 16.80       | 1     | 9e+004 |            |
| 10          |          | 6.00  | 7e+004  | 44.91       | 4     |        |            |
| 11          |          | 8.02  | 6e+003  | 3.63        | 2     | 5e+003 |            |
| 12          |          | 8.63  | 5e+003  | 3.42        | 1     | 5e+003 |            |
| 15          |          | 9.73  | 3e+003  | 1.93        | 1     | 5e+003 |            |
| 17          |          | 10.52 | 4e+003  | 2.45        | 1     | 5e+003 |            |
| 21          |          | 11.32 | 4e+003  | 2.52        | 1     | 6e+003 |            |
| 22          |          | 12.07 | 7e+003  | 4.33        | 1     | 9e+003 |            |
| 24          |          | 13.07 | 6e+003  | 3.74        | 1     | 7e+003 |            |
| 27          |          | 14.68 | 2e+004  | 12.56       | 3     | 7e+003 |            |
| 31          |          | 16.88 | 6e+003  | 3.72        | 1     | 1e+004 |            |

# Openlynx Report -

Sample: 644  
File: LK-3  
Description: Default file

Vial: 1:B,5  
Date: 03-Aug-2023

ID:  
Time: 13:20:09

Page 3

Printed: Thu Aug 03 15:05:46 2023

## Sample Report (continued):

3: UV Detector: 254

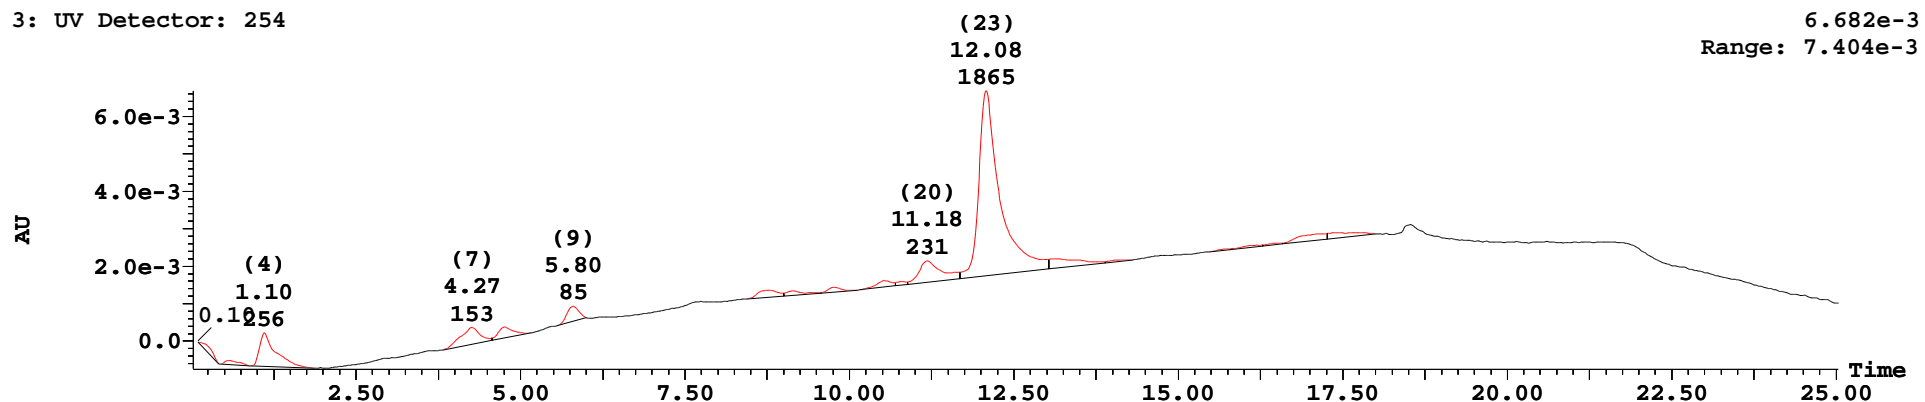

| Peak Number | Compound | Time  | AreaAbs | Area %Total | Width | Height | Mass Found |
|-------------|----------|-------|---------|-------------|-------|--------|------------|
| 1           |          | 0.10  | 3e+001  | 0.97        | 0     |        |            |
| 2           |          | 0.57  | 3e+001  | 0.89        | 0     | 1e+002 |            |
| 4           |          | 1.10  | 3e+002  | 7.90        | 1     | 9e+002 |            |
| 7           |          | 4.27  | 2e+002  | 4.73        | 1     | 4e+002 |            |
| 8           |          | 4.75  | 8e+001  | 2.35        | 1     | 3e+002 |            |
| 9           |          | 5.80  | 8e+001  | 2.62        | 0     | 4e+002 |            |
| 13          |          | 8.78  | 7e+001  | 2.04        | 1     | 2e+002 |            |
| 14          |          | 9.15  | 3e+001  | 1.02        | 1     | 1e+002 |            |
| 16          |          | 9.77  | 3e+001  | 0.87        | 1     | 1e+002 |            |
| 18          |          | 10.53 | 5e+001  | 1.48        | 1     | 2e+002 |            |
| 19          |          | 10.78 | 2e+001  | 0.50        | 0     | 1e+002 |            |
| 20          |          | 11.18 | 2e+002  | 7.13        | 1     | 6e+002 |            |
| 23          |          | 12.08 | 2e+003  | 57.66       | 1     | 5e+003 |            |
| 25          |          | 13.13 | 1e+002  | 3.87        | 1     | 3e+002 |            |
| 26          |          | 14.30 | 1e+001  | 0.34        | 0     |        |            |
| 28          |          | 15.80 | 5e+000  | 0.15        | 0     | 1e+001 |            |
| 29          |          | 16.28 | 1e+001  | 0.45        | 0     | 2e+001 |            |
| 30          |          | 16.58 | 9e+000  | 0.27        | 0     | 2e+001 |            |
| 32          |          | 17.27 | 9e+001  | 2.66        | 1     | 1e+002 |            |
| 33          |          | 17.40 | 7e+001  | 2.10        | 1     | 1e+002 |            |

**Openlynx Report -**

Sample: 644

File:LK-3

Description:Default file

Vial:1:B,5

Date:03-Aug-2023

ID:

Time:13:20:09

Page 4

Printed: Thu Aug 03 15:05:46 2023

**Sample Report (continued):**

| Peak ID | Compound | Time | Mass Found |
|---------|----------|------|------------|
|---------|----------|------|------------|

1

0.10

1: (Time: 0.10)

1:MS ES-  
3.8e+004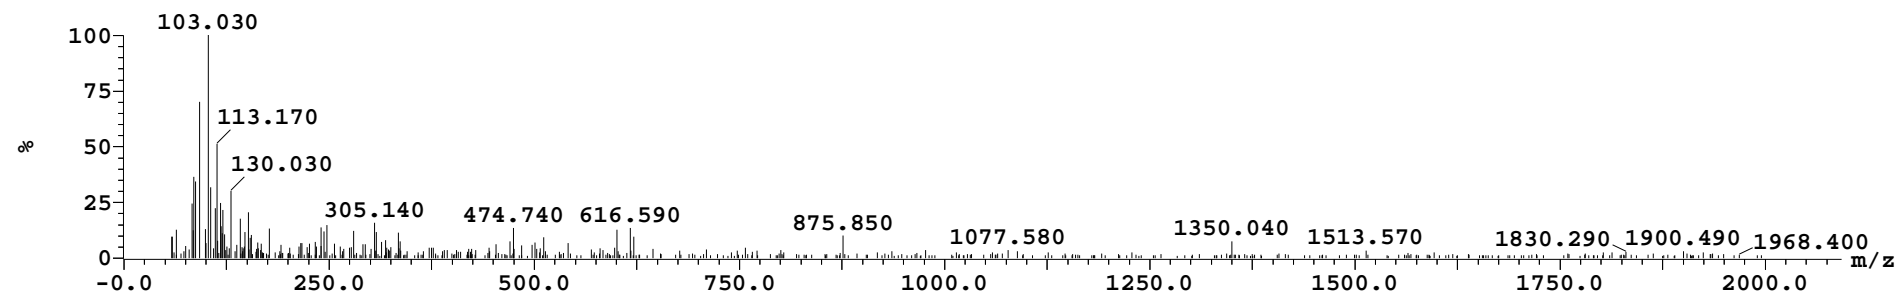

| Peak ID | Compound | Time | Mass Found |
|---------|----------|------|------------|
|---------|----------|------|------------|

2

0.57

2: (Time: 0.57)

1:MS ES-  
8.9e+004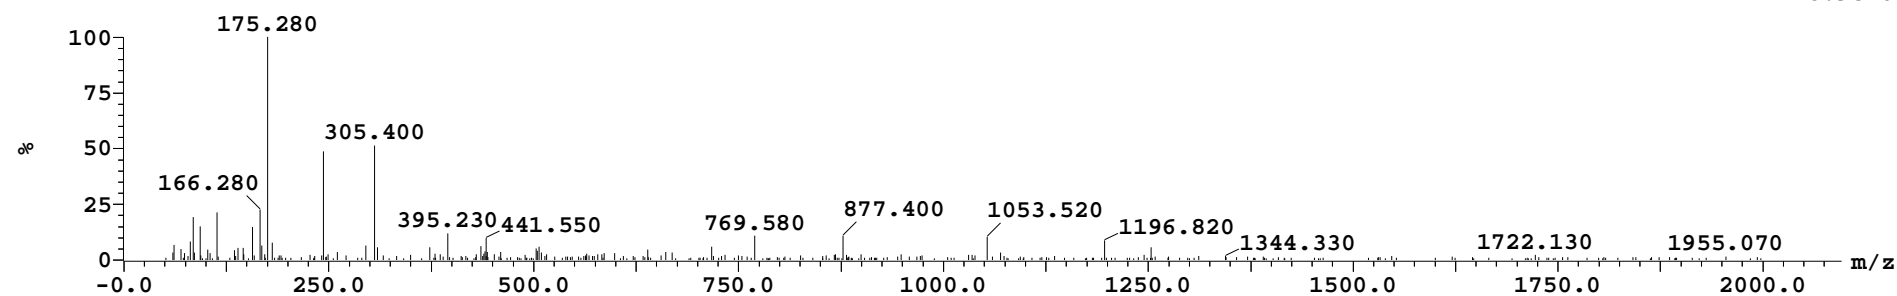

**Openlynx Report -**

Page 5

Sample: 644

Vial:1:B,5

ID:

File:LK-3

Date:03-Aug-2023

Time:13:20:09

Description:Default file

Printed: Thu Aug 03 15:05:46 2023

**Sample Report (continued):**

| Peak ID | Compound | Time | Mass Found |
|---------|----------|------|------------|
|---------|----------|------|------------|

3

1.08

3: (Time: 1.08)

1:MS ES-  
2.6e+004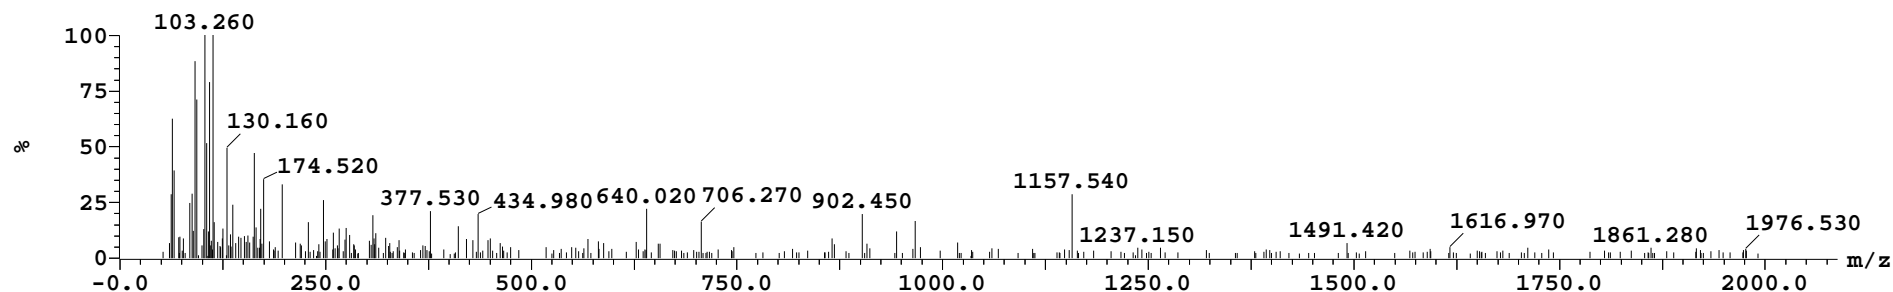

| Peak ID | Compound | Time | Mass Found |
|---------|----------|------|------------|
|---------|----------|------|------------|

4

1.10

4: (Time: 1.10)

1:MS ES-  
2.5e+006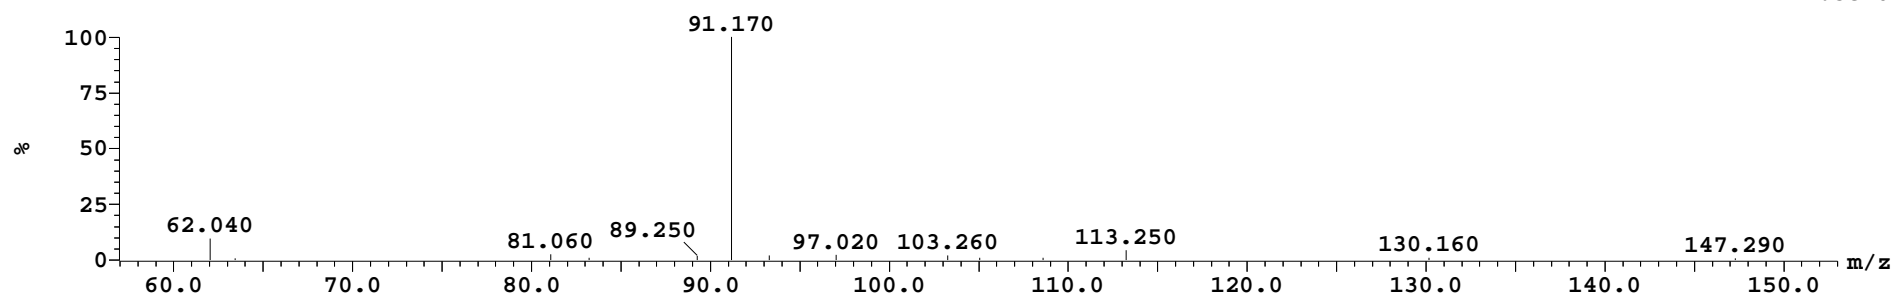

**Openlynx Report -**

Sample: 644

File:LK-3

Description:Default file

Vial:1:B,5

Date:03-Aug-2023

ID:

Time:13:20:09

Page 6

Printed: Thu Aug 03 15:05:46 2023

**Sample Report (continued):**

| Peak ID | Compound | Time | Mass Found |
|---------|----------|------|------------|
| 5       |          | 1.27 |            |

5: (Time: 1.27)

1:MS ES-  
4.3e+005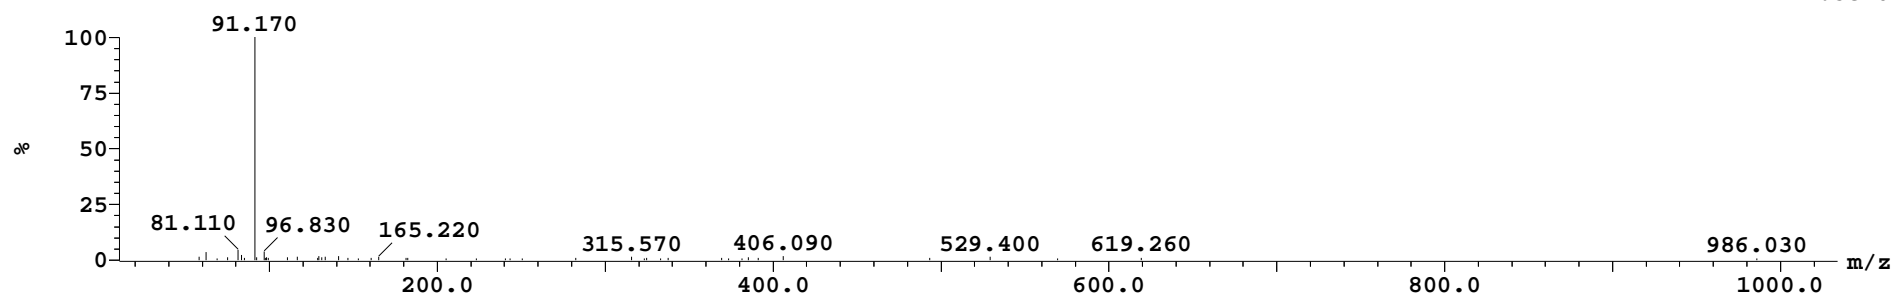

| Peak ID | Compound | Time | Mass Found |
|---------|----------|------|------------|
| 6       |          | 3.40 |            |

6: (Time: 3.40)

1:MS ES-  
8.9e+004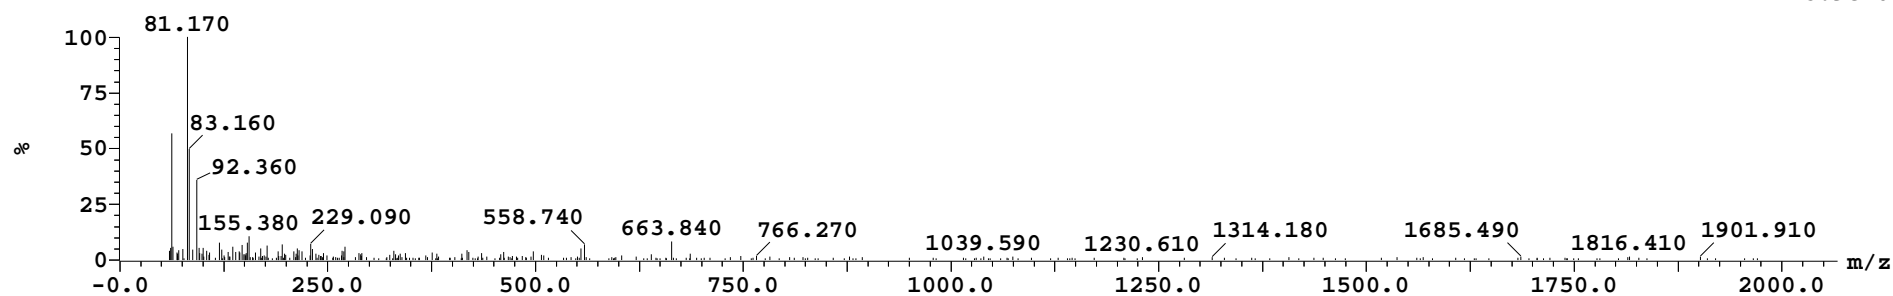

**Openlynx Report -**

Sample: 644

File:LK-3

Description:Default file

Vial:1:B,5

Date:03-Aug-2023

ID:

Time:13:20:09

Page 7

Printed: Thu Aug 03 15:05:46 2023

**Sample Report (continued):**

| Peak ID | Compound | Time | Mass Found |
|---------|----------|------|------------|
|---------|----------|------|------------|

7

4.27

7: (Time: 4.27)

1:MS ES-  
5.6e+004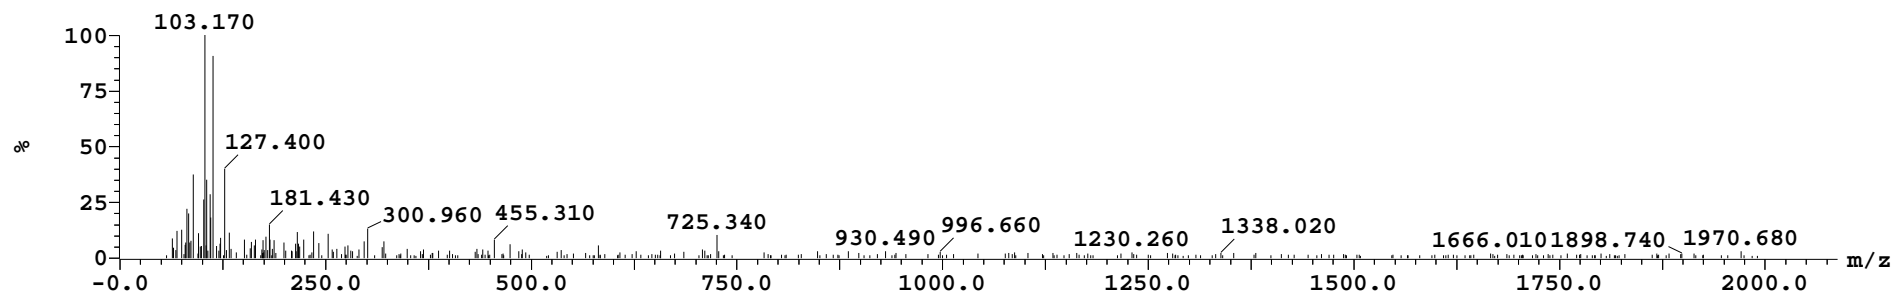

| Peak ID | Compound | Time | Mass Found |
|---------|----------|------|------------|
|---------|----------|------|------------|

8

4.75

8: (Time: 4.75)

1:MS ES-  
7.5e+005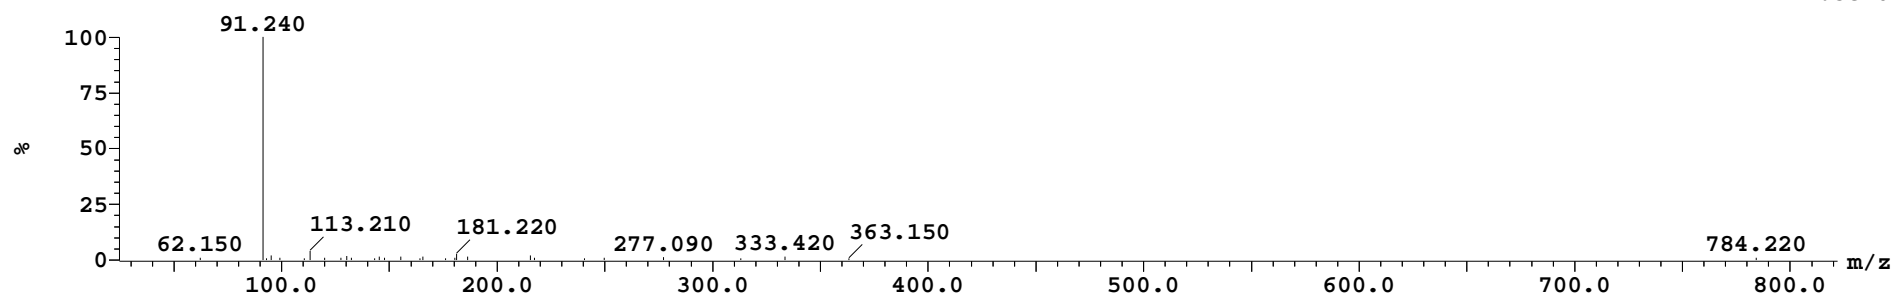

**Openlynx Report -**

Sample: 644

File:LK-3

Description:Default file

Vial:1:B,5

Date:03-Aug-2023

ID:

Time:13:20:09

Page 8

Printed: Thu Aug 03 15:05:46 2023

**Sample Report (continued):**

| Peak ID | Compound | Time | Mass Found |
|---------|----------|------|------------|
|---------|----------|------|------------|

9

5.80

9: (Time: 5.80)

1:MS ES-  
6.6e+004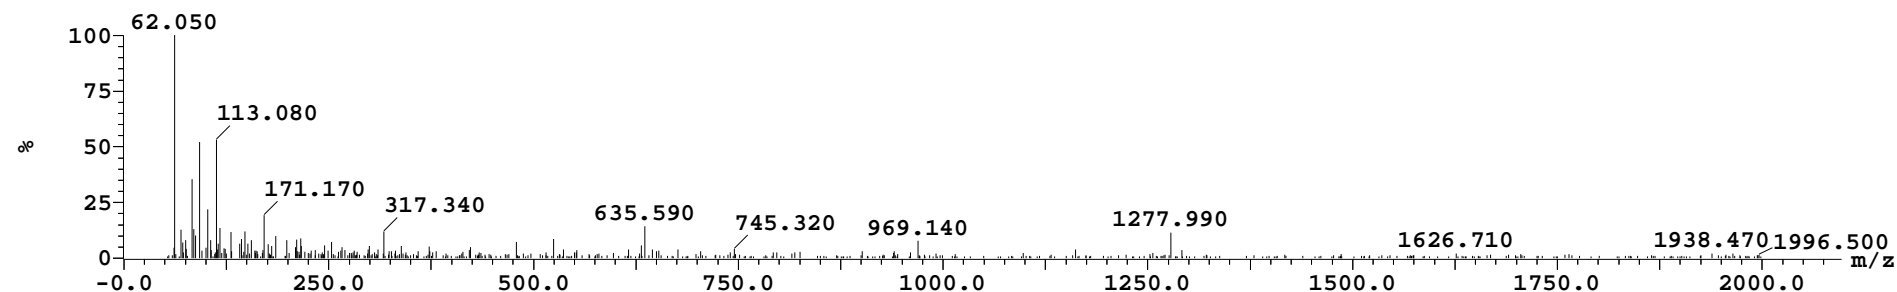

| Peak ID | Compound | Time | Mass Found |
|---------|----------|------|------------|
|---------|----------|------|------------|

10

6.00

10: (Time: 6.00)

1:MS ES-  
4.5e+005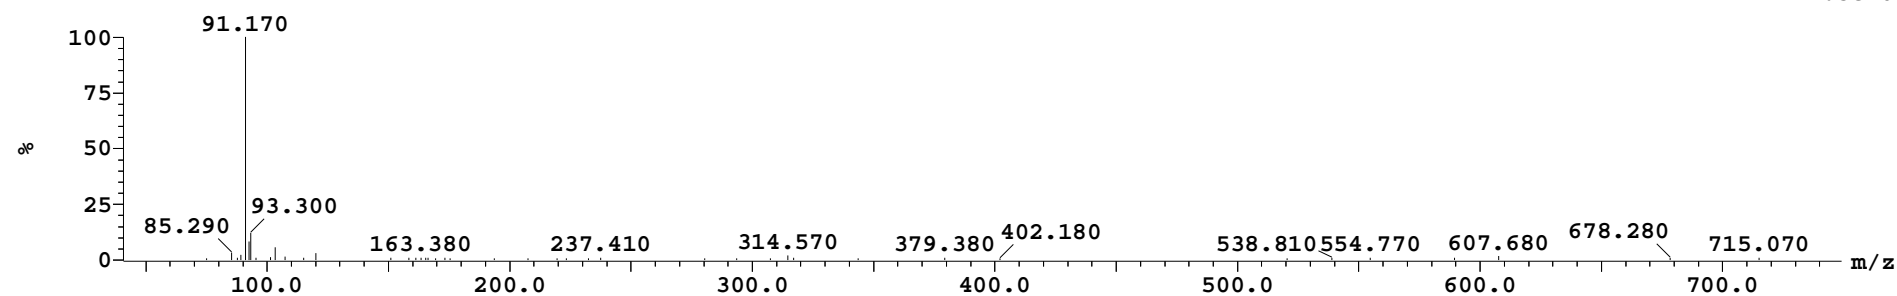



**Openlynx Report -**

Sample: 644

File:LK-3

Description:Default file

Vial:1:B,5

Date:03-Aug-2023

ID:

Time:13:20:09

Page 9

Printed: Thu Aug 03 15:05:46 2023

**Sample Report (continued):**

| Peak ID | Compound | Time | Mass Found |
|---------|----------|------|------------|
|---------|----------|------|------------|

|    |  |      |  |
|----|--|------|--|
| 11 |  | 8.02 |  |
|----|--|------|--|

11: (Time: 8.02)

1:MS ES-  
4.8e+004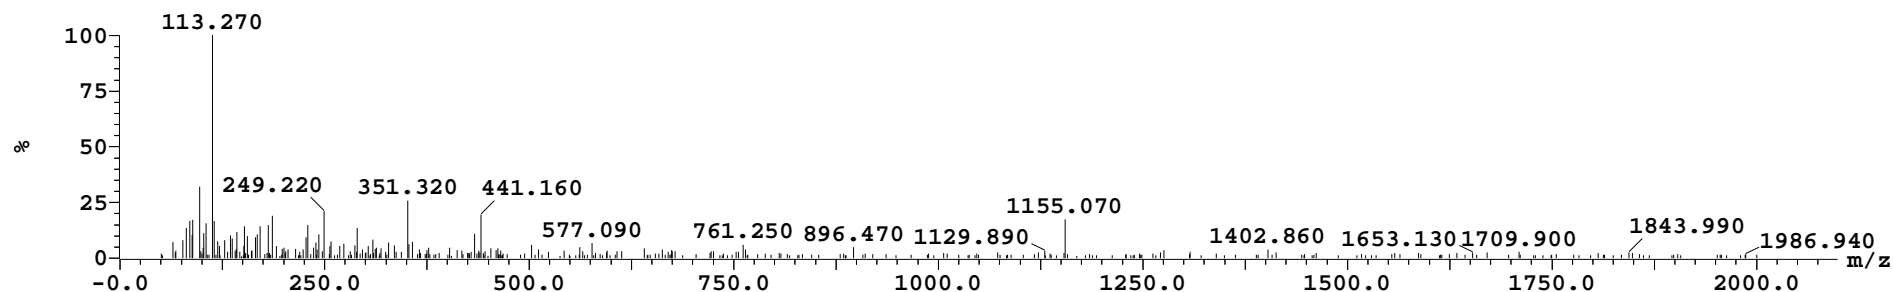

| Peak ID | Compound | Time | Mass Found |
|---------|----------|------|------------|
|---------|----------|------|------------|

|    |  |      |  |
|----|--|------|--|
| 12 |  | 8.63 |  |
|----|--|------|--|

12: (Time: 8.63)

1:MS ES-  
3.3e+004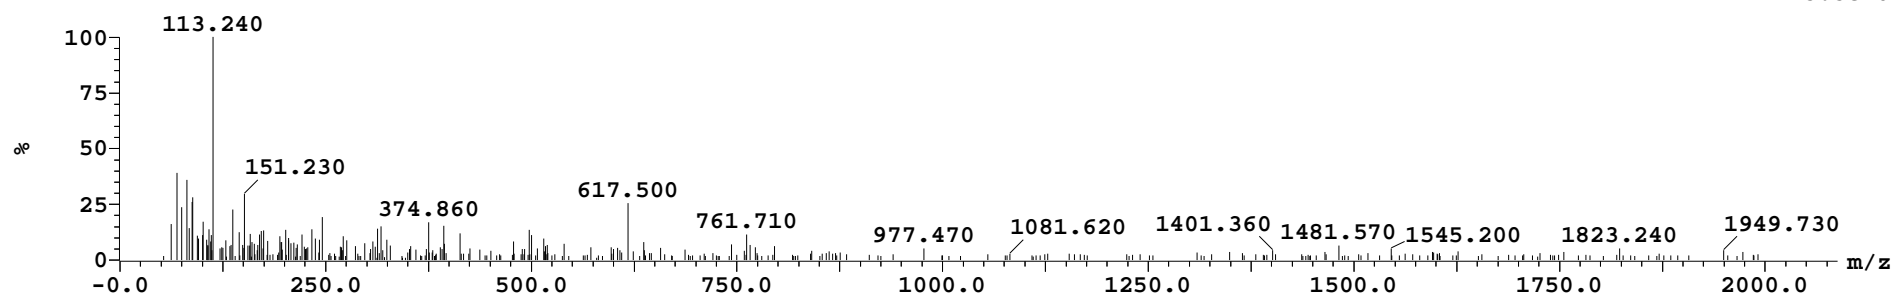

**Openlynx Report -**

Sample: 644

File:LK-3

Description:Default file

Vial:1:B,5

Date:03-Aug-2023

ID:

Time:13:20:09

Page 10

Printed: Thu Aug 03 15:05:46 2023

**Sample Report (continued):**

| Peak ID | Compound | Time | Mass Found |
|---------|----------|------|------------|
| 13      |          | 8.78 |            |

13: (Time: 8.78)

1:MS ES-  
2.7e+006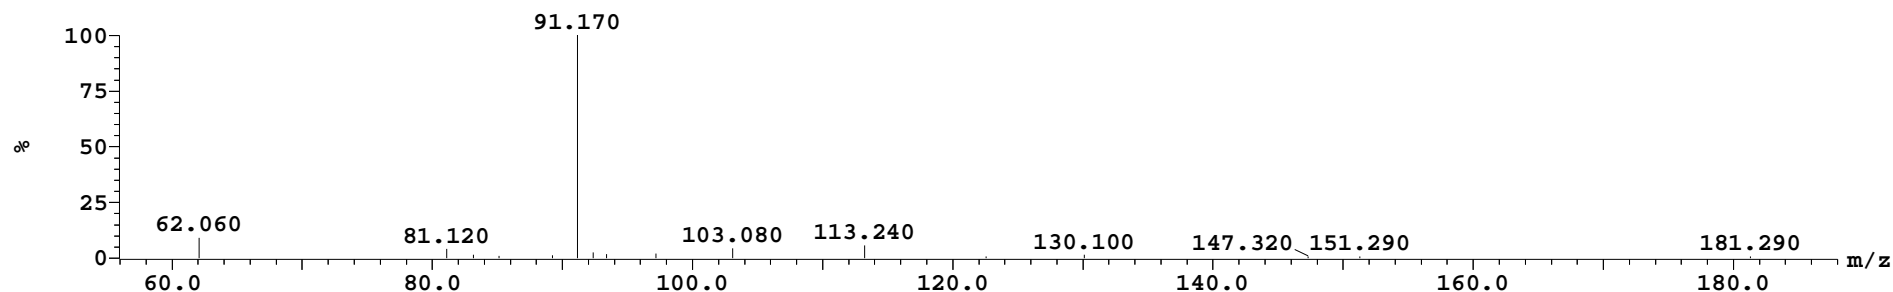

| Peak ID | Compound | Time | Mass Found |
|---------|----------|------|------------|
| 14      |          | 9.15 |            |

14: (Time: 9.15)

1:MS ES-  
3.5e+004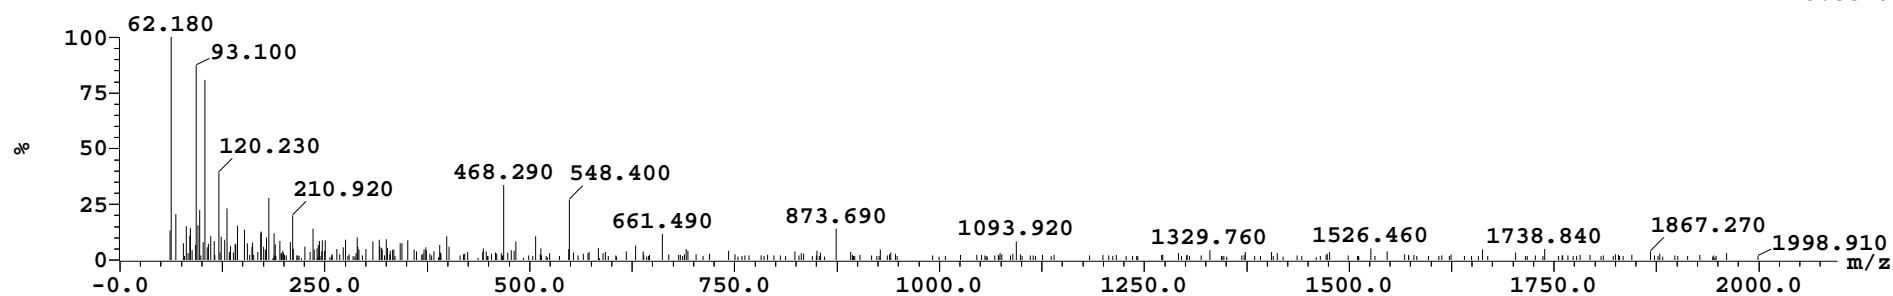

**Openlynx Report -**

Sample: 644

File:LK-3

Description:Default file

Vial:1:B,5

Date:03-Aug-2023

ID:

Time:13:20:09

Page 11

Printed: Thu Aug 03 15:05:46 2023

**Sample Report (continued):**

| Peak ID | Compound | Time | Mass Found |
|---------|----------|------|------------|
|---------|----------|------|------------|

|    |  |      |  |
|----|--|------|--|
| 15 |  | 9.73 |  |
|----|--|------|--|

15:(Time: 9.73)

1:MS ES-  
9.0e+004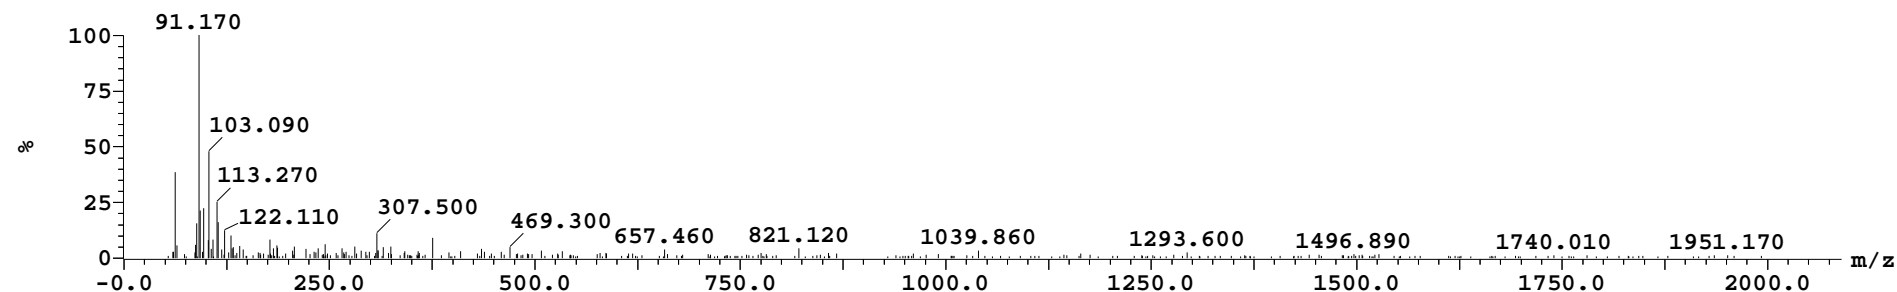

| Peak ID | Compound | Time | Mass Found |
|---------|----------|------|------------|
|---------|----------|------|------------|

|    |  |      |  |
|----|--|------|--|
| 16 |  | 9.77 |  |
|----|--|------|--|

16:(Time: 9.77)

1:MS ES-  
4.9e+004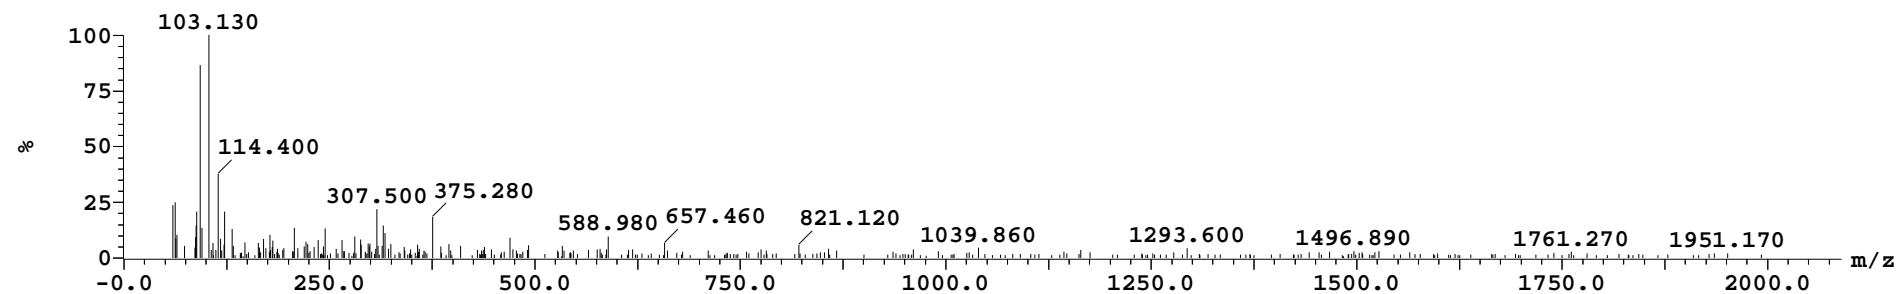

**Openlynx Report -**

Sample: 644

File:LK-3

Description:Default file

Vial:1:B,5

Date:03-Aug-2023

ID:

Time:13:20:09

Page 12

Printed: Thu Aug 03 15:05:46 2023

**Sample Report (continued):**

| Peak ID | Compound | Time  | Mass Found |
|---------|----------|-------|------------|
| 17      |          | 10.52 |            |

17: (Time: 10.52)

1:MS ES-  
4.6e+004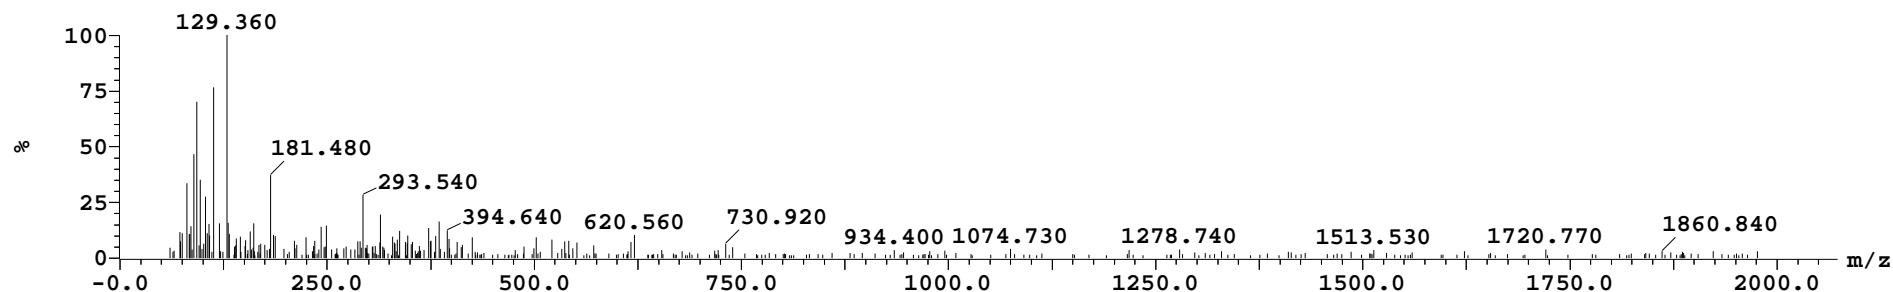

| Peak ID | Compound | Time  | Mass Found |
|---------|----------|-------|------------|
| 18      |          | 10.53 |            |

18: (Time: 10.53)

1:MS ES-  
3.5e+004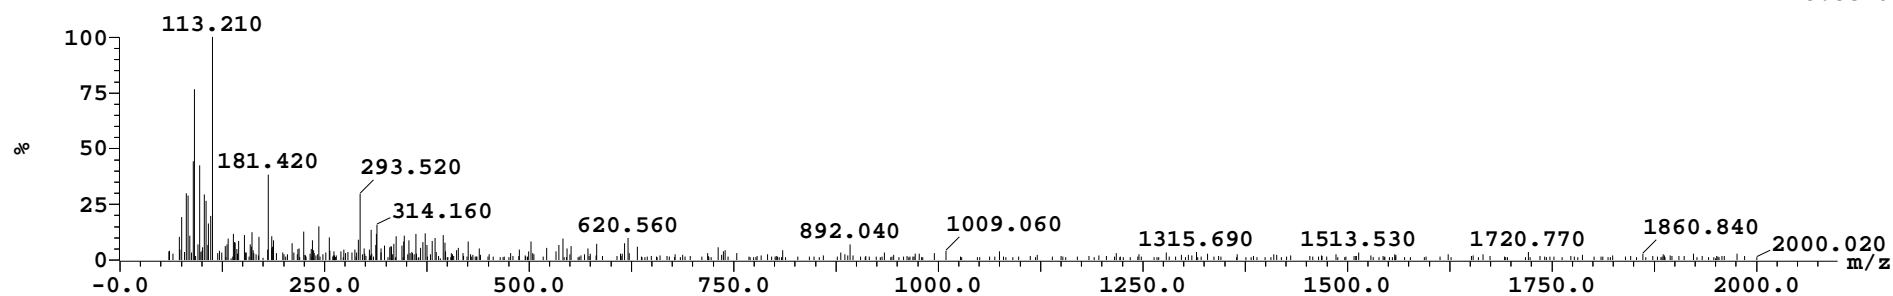

**Openlynx Report -**

Page 13

Sample: 644

Vial:1:B,5

ID:

File:LK-3

Date:03-Aug-2023

Time:13:20:09

Description:Default file

Printed: Thu Aug 03 15:05:46 2023

**Sample Report (continued):**

| Peak ID | Compound | Time  | Mass Found |
|---------|----------|-------|------------|
| 19      |          | 10.78 |            |

19: (Time: 10.78)

1:MS ES-  
2.7e+006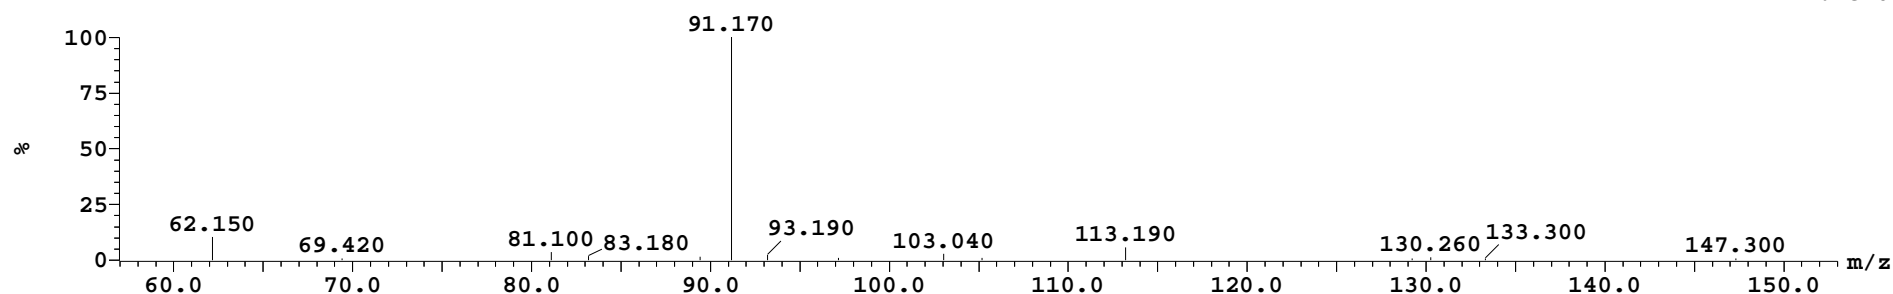

| Peak ID | Compound | Time  | Mass Found |
|---------|----------|-------|------------|
| 20      |          | 11.18 |            |

20: (Time: 11.18)

1:MS ES-  
1.8e+004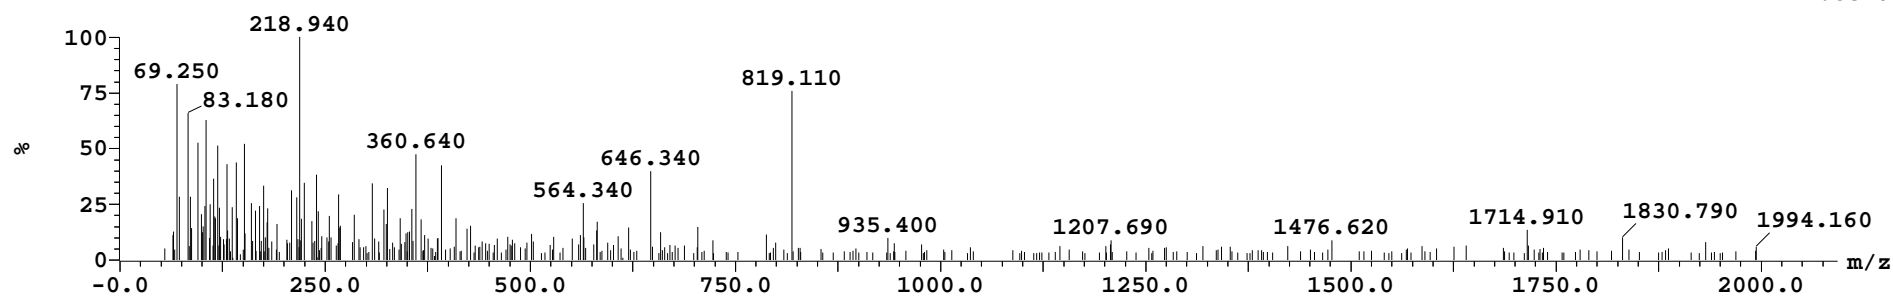

**Openlynx Report -**

Page 14

Sample: 644

Vial:1:B,5

ID:

File:LK-3

Date:03-Aug-2023

Time:13:20:09

Description:Default file

Printed: Thu Aug 03 15:05:46 2023

**Sample Report (continued):**

| Peak ID | Compound | Time | Mass Found |
|---------|----------|------|------------|
|---------|----------|------|------------|

|    |  |       |  |
|----|--|-------|--|
| 21 |  | 11.32 |  |
|----|--|-------|--|

21: (Time: 11.32)

1:MS ES-  
4.4e+004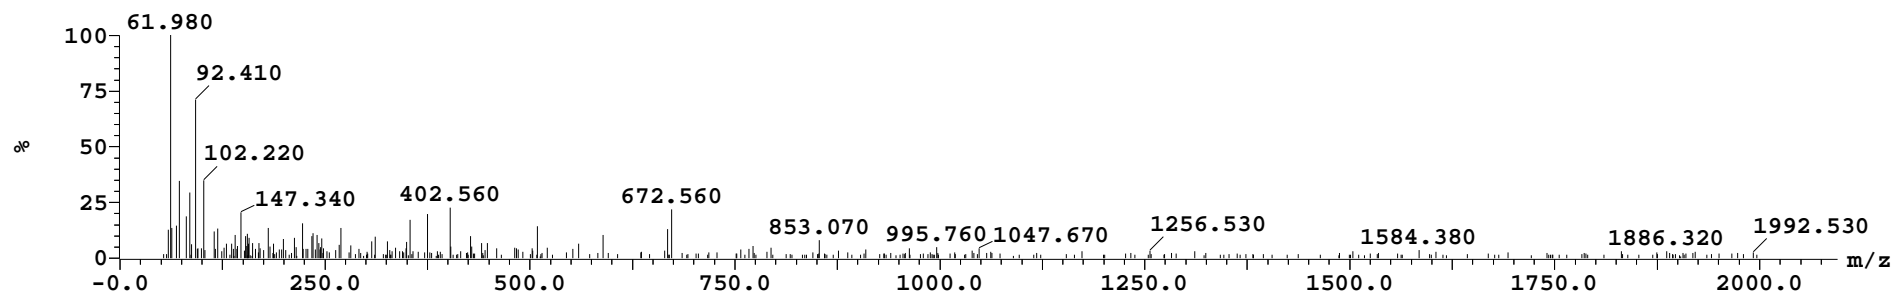

| Peak ID | Compound | Time | Mass Found |
|---------|----------|------|------------|
|---------|----------|------|------------|

|    |  |       |  |
|----|--|-------|--|
| 22 |  | 12.07 |  |
|----|--|-------|--|

22: (Time: 12.07)

1:MS ES-  
1.1e+005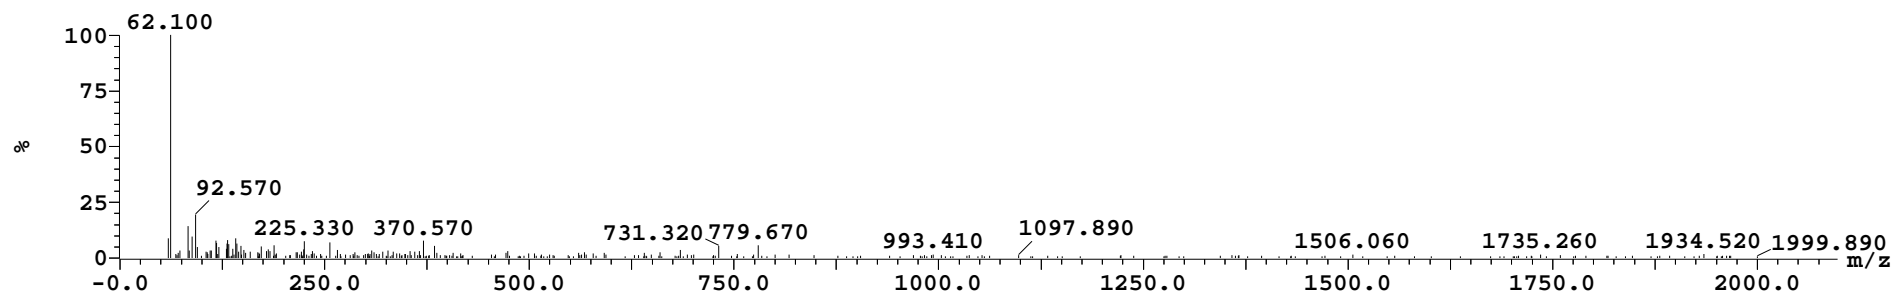

**Openlynx Report -**

Sample: 644

File:LK-3

Description:Default file

Vial:1:B,5

Date:03-Aug-2023

ID:

Time:13:20:09

Page 15

Printed: Thu Aug 03 15:05:46 2023

**Sample Report (continued):**

| Peak ID | Compound | Time  | Mass Found |
|---------|----------|-------|------------|
| 23      |          | 12.08 |            |

23:(Time: 12.08)

1:MS ES-  
2.1e+006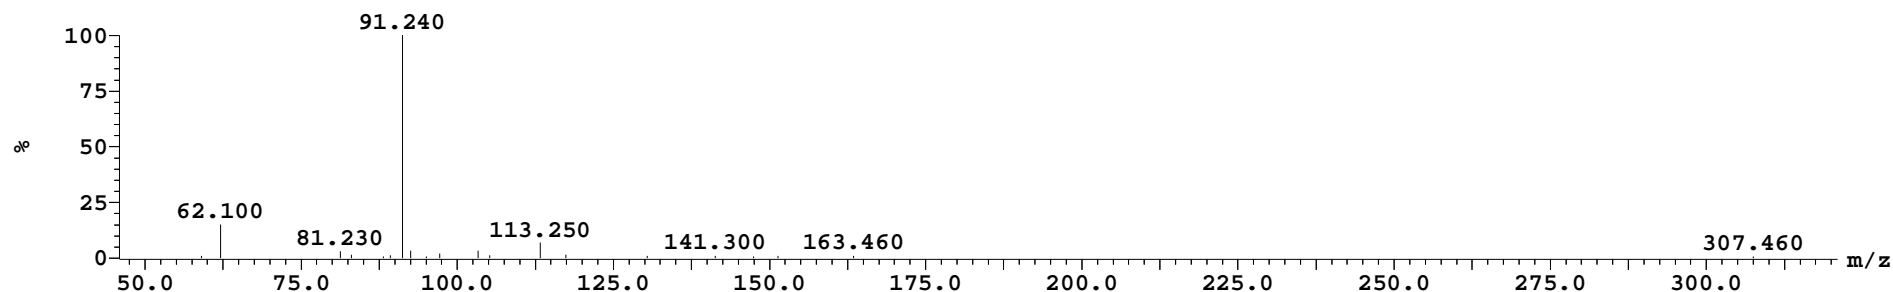

| Peak ID | Compound | Time  | Mass Found |
|---------|----------|-------|------------|
| 24      |          | 13.07 |            |

24:(Time: 13.07)

1:MS ES-  
5.2e+004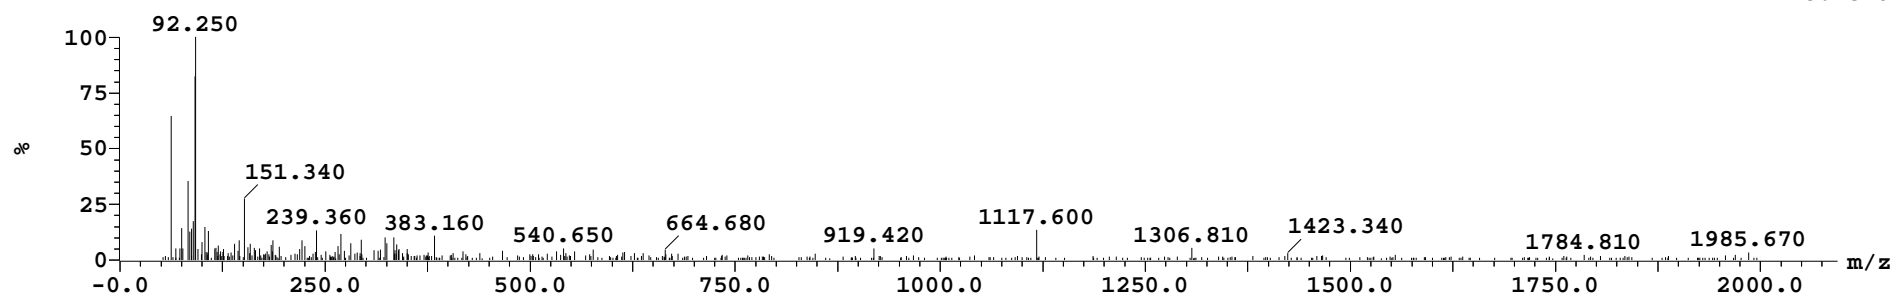

**Openlynx Report -**

Sample: 644

File:LK-3

Description:Default file

Vial:1:B,5

Date:03-Aug-2023

ID:

Time:13:20:09

Page 16

Printed: Thu Aug 03 15:05:46 2023

**Sample Report (continued):**

| Peak ID | Compound | Time  | Mass Found |
|---------|----------|-------|------------|
| 25      |          | 13.13 |            |

25: (Time: 13.13)

1:MS ES-  
8.3e+004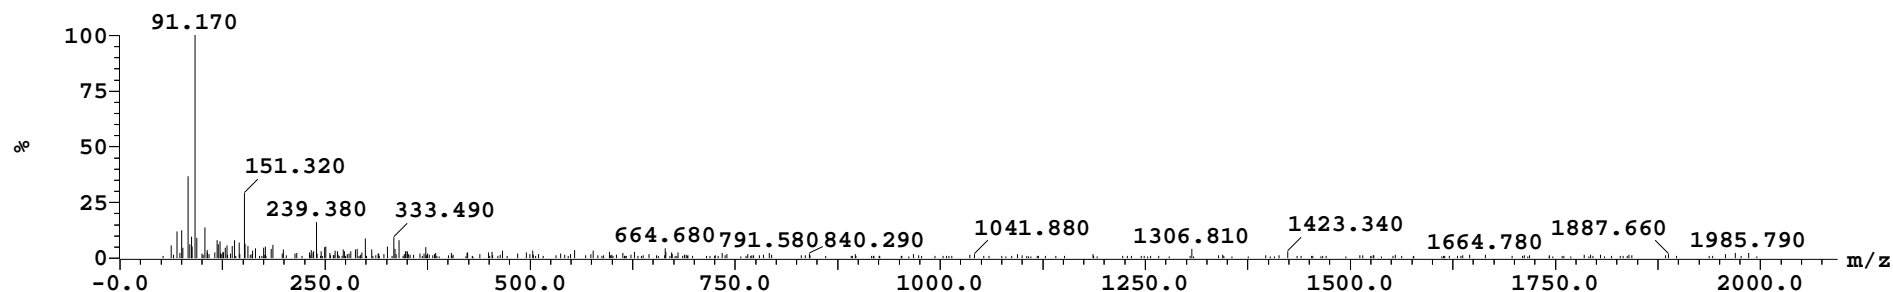

| Peak ID | Compound | Time  | Mass Found |
|---------|----------|-------|------------|
| 26      |          | 14.30 |            |

26: (Time: 14.30)

1:MS ES-  
1.5e+004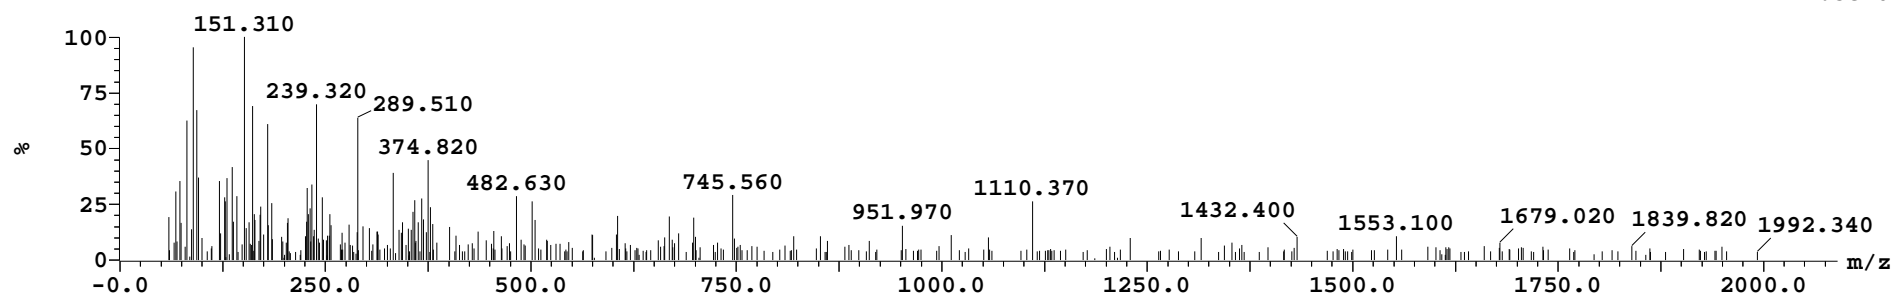



**Openlynx Report -**

Sample: 644

File:LK-3

Description:Default file

Vial:1:B,5

Date:03-Aug-2023

ID:

Time:13:20:09

Page 17

Printed: Thu Aug 03 15:05:46 2023

**Sample Report (continued):**

| Peak ID | Compound | Time  | Mass Found |
|---------|----------|-------|------------|
| 27      |          | 14.68 |            |

27:(Time: 14.68)

1:MS ES-  
5.7e+004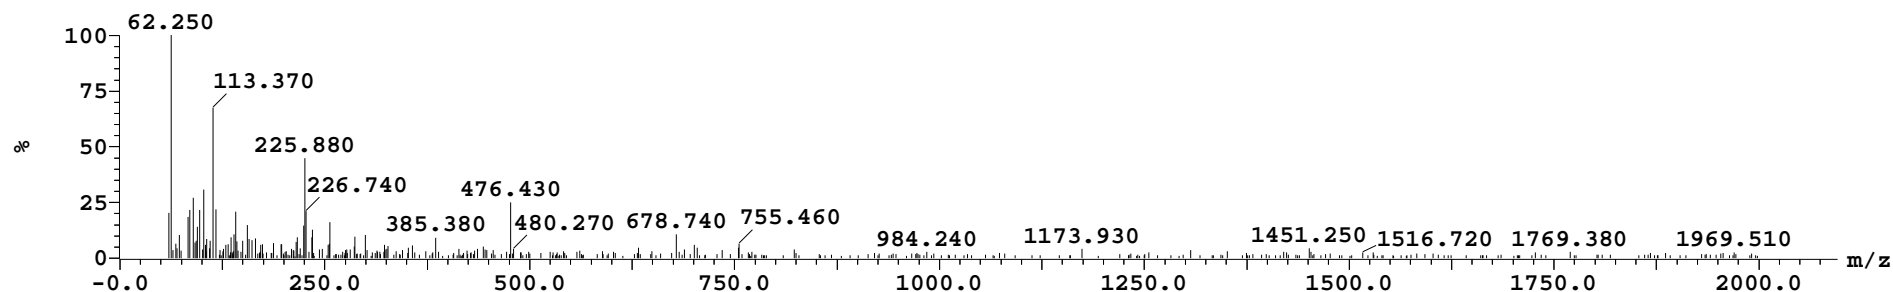

| Peak ID | Compound | Time  | Mass Found |
|---------|----------|-------|------------|
| 28      |          | 15.80 |            |

28:(Time: 15.80)

1:MS ES-  
2.0e+004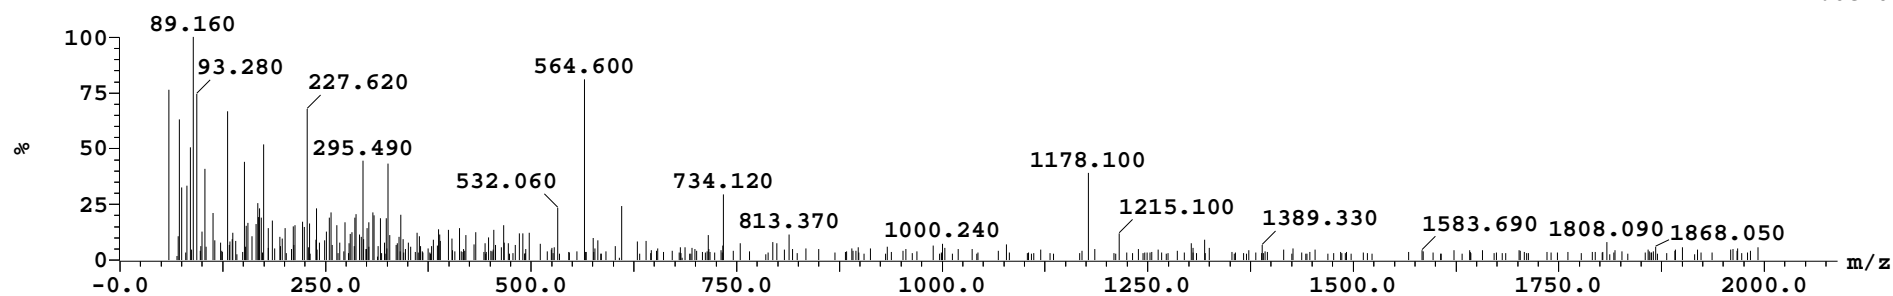

**Openlynx Report -**

Sample: 644

File:LK-3

Description:Default file

Vial:1:B,5

Date:03-Aug-2023

ID:

Time:13:20:09

Page 18

Printed: Thu Aug 03 15:05:46 2023

**Sample Report (continued):**

| Peak ID | Compound | Time | Mass Found |
|---------|----------|------|------------|
|---------|----------|------|------------|

|    |  |       |  |
|----|--|-------|--|
| 29 |  | 16.28 |  |
|----|--|-------|--|

29: (Time: 16.28)

1:MS ES-  
7.7e+004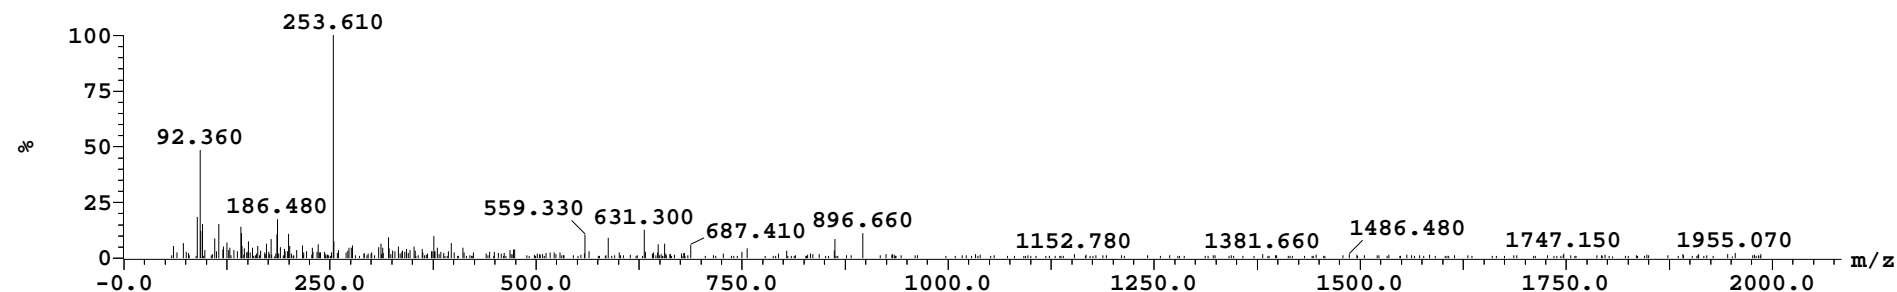

| Peak ID | Compound | Time | Mass Found |
|---------|----------|------|------------|
|---------|----------|------|------------|

|    |  |       |  |
|----|--|-------|--|
| 30 |  | 16.58 |  |
|----|--|-------|--|

30: (Time: 16.58)

1:MS ES-  
9.7e+004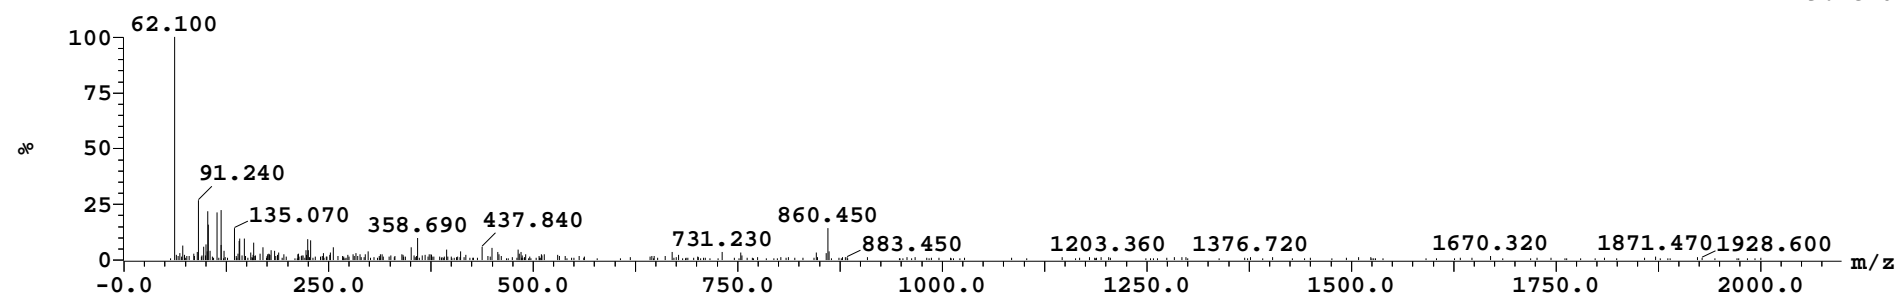

**Openlynx Report -**

Page 19

Sample: 644

Vial:1:B,5

ID:

File:LK-3

Date:03-Aug-2023

Time:13:20:09

Description:Default file

Printed: Thu Aug 03 15:05:46 2023

**Sample Report (continued):**

| Peak ID | Compound | Time | Mass Found |
|---------|----------|------|------------|
|---------|----------|------|------------|

|    |  |       |  |
|----|--|-------|--|
| 31 |  | 16.88 |  |
|----|--|-------|--|

31:(Time: 16.88)

1:MS ES-  
2.2e+005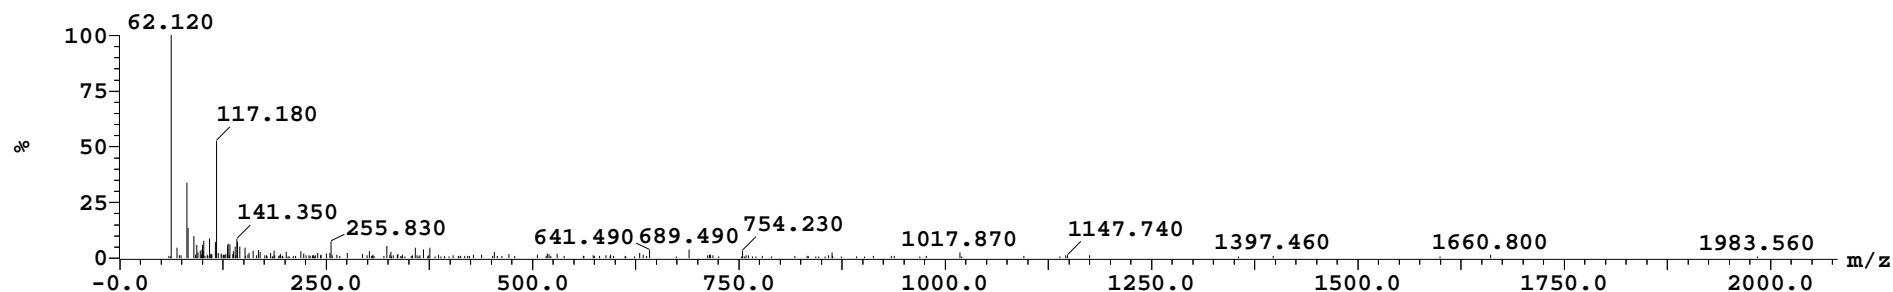

| Peak ID | Compound | Time | Mass Found |
|---------|----------|------|------------|
|---------|----------|------|------------|

|    |  |       |  |
|----|--|-------|--|
| 32 |  | 17.27 |  |
|----|--|-------|--|

32:(Time: 17.27)

1:MS ES-  
8.0e+004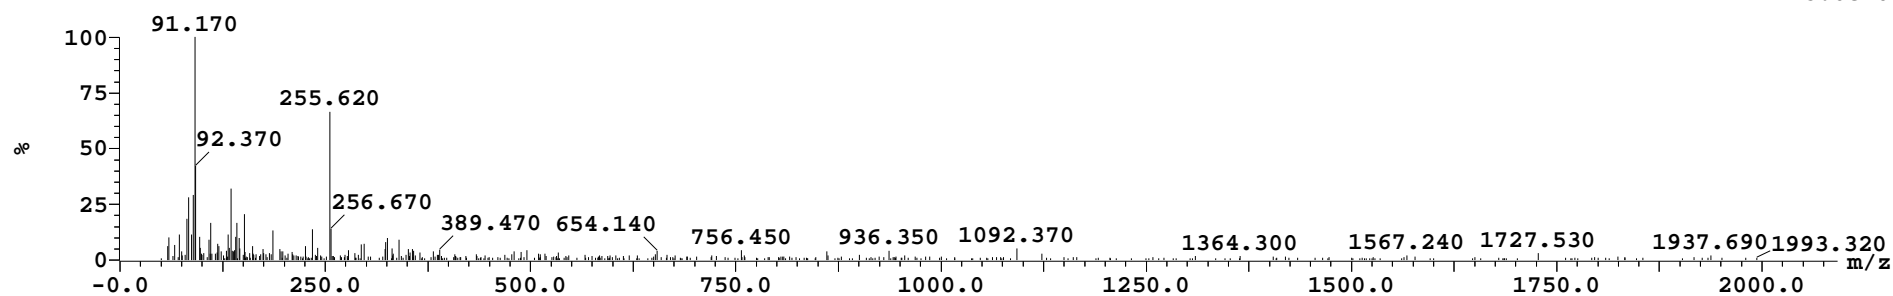

**Openlynx Report -**

Page 20

Sample: 644

Vial:1:B,5

ID:

File:LK-3

Date:03-Aug-2023

Time:13:20:09

Description:Default file

Printed: Thu Aug 03 15:05:46 2023

**Sample Report (continued):**

| Peak ID | Compound | Time | Mass Found |
|---------|----------|------|------------|
|---------|----------|------|------------|

|    |  |       |  |
|----|--|-------|--|
| 33 |  | 17.40 |  |
|----|--|-------|--|

33: (Time: 17.40)

1:MS ES-  
5.4e+004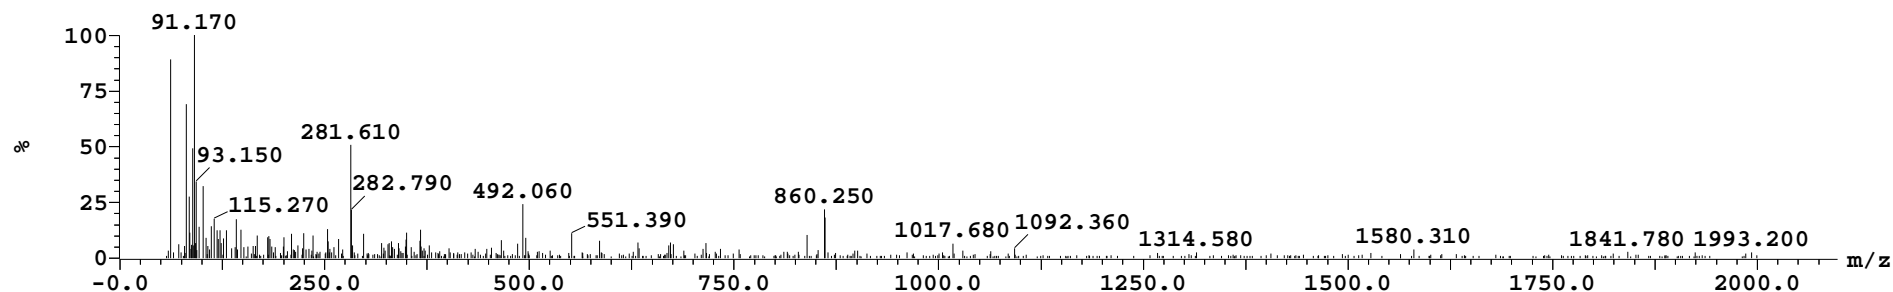

| Peak ID | Compound | Time | Mass Found |
|---------|----------|------|------------|
|---------|----------|------|------------|

|    |  |       |  |
|----|--|-------|--|
| 34 |  | 21.60 |  |
|----|--|-------|--|

34: (Time: 21.60)

1:MS ES-  
3.0e+005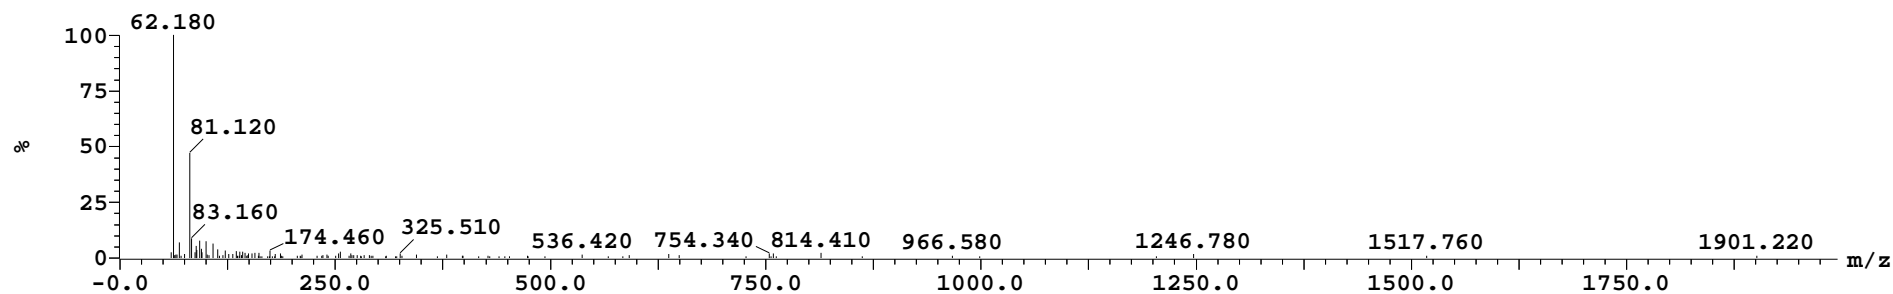

**Openlynx Report -**

Sample: 644

File:LK-3

Description:Default file

Vial:1:B,5

Date:03-Aug-2023

ID:

Time:13:20:09

Page 21

Printed: Thu Aug 03 15:05:46 2023

**Sample Report (continued):**

| Peak ID | Compound | Time | Mass Found |
|---------|----------|------|------------|
|---------|----------|------|------------|

1: (Time: 0.10)

2:MS ES+  
5.8e+007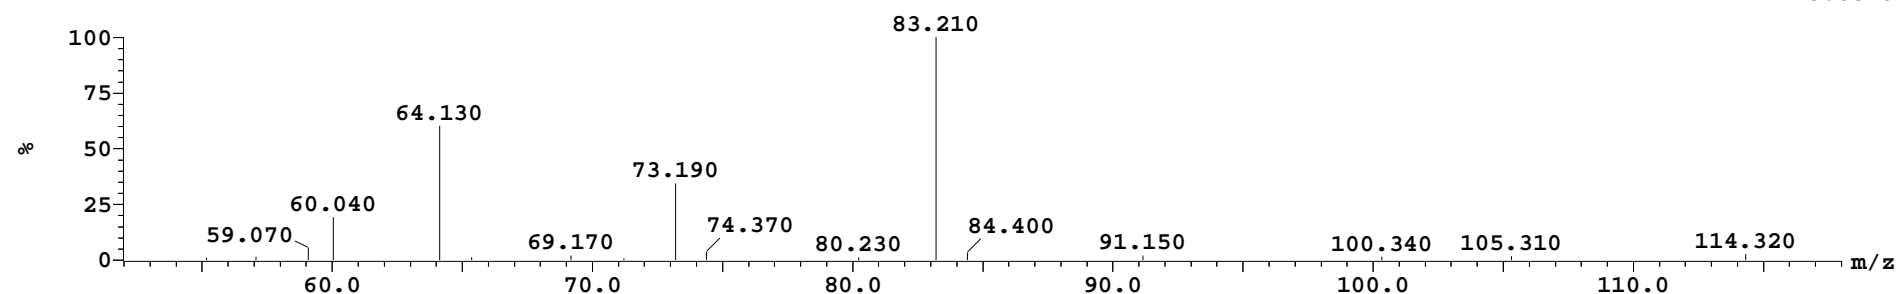

| Peak ID | Compound | Time | Mass Found |
|---------|----------|------|------------|
|---------|----------|------|------------|

2: (Time: 0.57)

2:MS ES+  
4.6e+007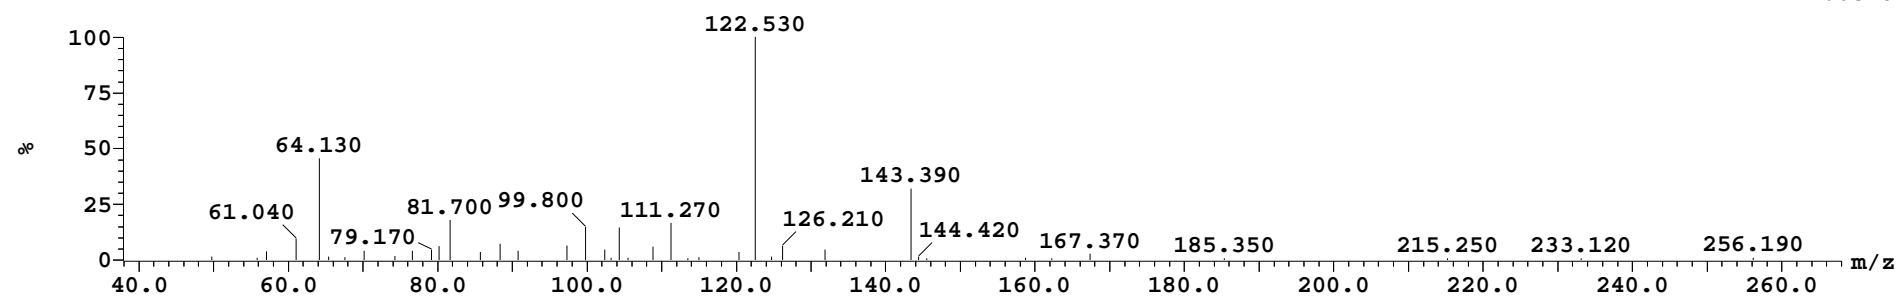

Openlynx Report -

Sample: 644  
File:LK-3  
Description:Default file

Vial:1:B,5  
Date:03-Aug-2023

ID:  
Time:13:20:09

Printed: Thu Aug 03 15:05:46 2023

Sample Report (continued):

| Peak ID         | Compound | Time | Mass Found           |
|-----------------|----------|------|----------------------|
| 3               |          | 1.08 |                      |
| 3: (Time: 1.08) |          |      |                      |
|                 |          |      | 2:MS ES+<br>2.5e+006 |

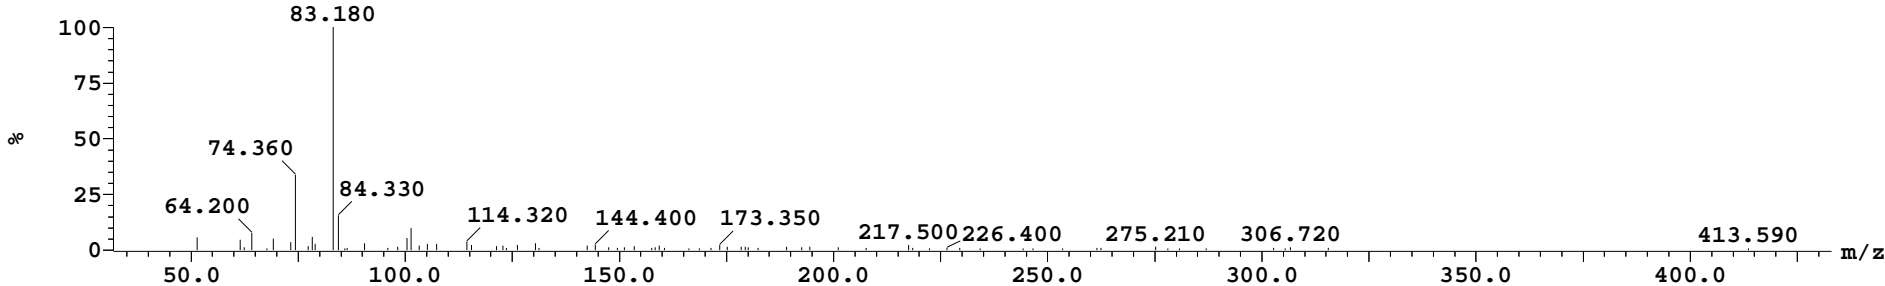

| Peak ID         | Compound | Time | Mass Found           |
|-----------------|----------|------|----------------------|
| 4               |          | 1.10 |                      |
| 4: (Time: 1.10) |          |      |                      |
|                 |          |      | 2:MS ES+<br>2.5e+006 |

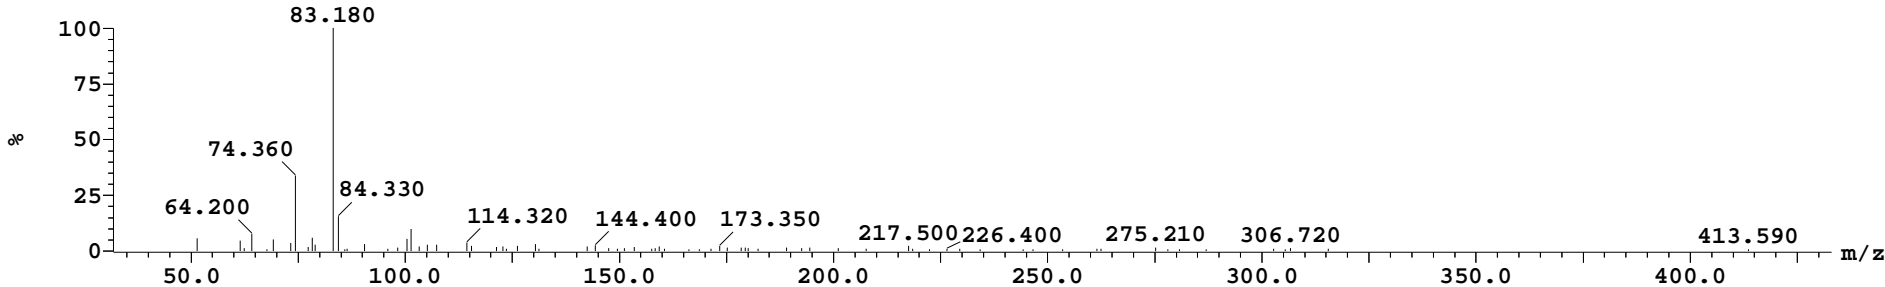

**Openlynx Report -**

Sample: 644

File:LK-3

Description:Default file

Vial:1:B,5

Date:03-Aug-2023

ID:

Time:13:20:09

Page 23

Printed: Thu Aug 03 15:05:46 2023

**Sample Report (continued):**

| Peak ID | Compound | Time | Mass Found |
|---------|----------|------|------------|
|---------|----------|------|------------|

7

4.27

7: (Time: 4.27)

2:MS ES+  
1.7e+005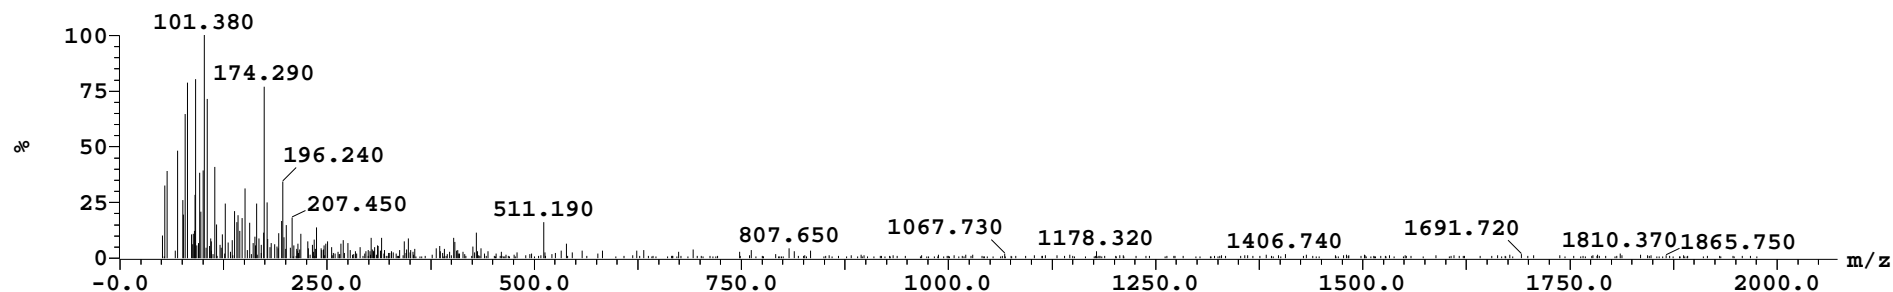

| Peak ID | Compound | Time | Mass Found |
|---------|----------|------|------------|
|---------|----------|------|------------|

8

4.75

8: (Time: 4.75)

2:MS ES+  
1.5e+006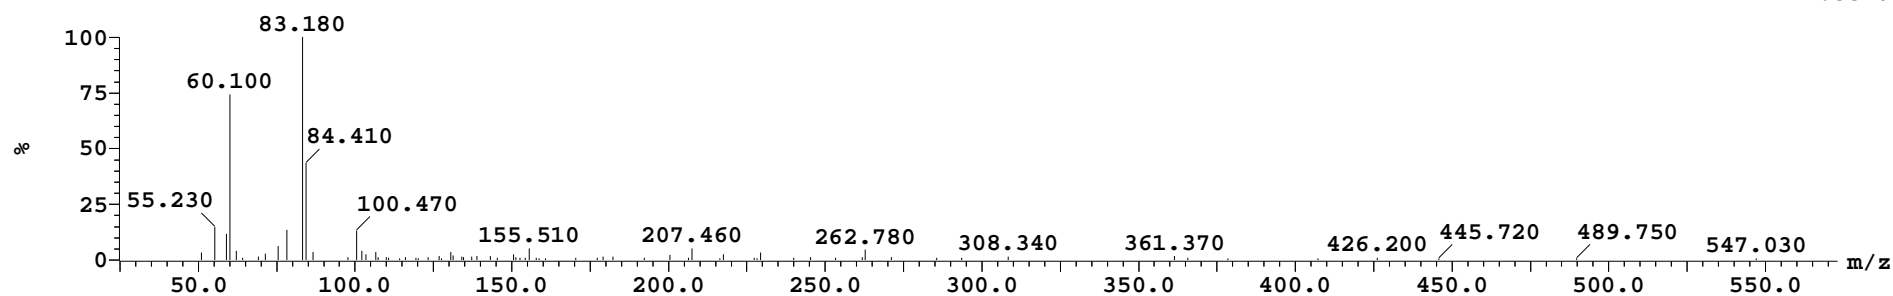

**Openlynx Report -**

Page 24

Sample: 644

Vial:1:B,5

ID:

File:LK-3

Date:03-Aug-2023

Time:13:20:09

Description:Default file

Printed: Thu Aug 03 15:05:46 2023

**Sample Report (continued):**

| Peak ID | Compound | Time | Mass Found |
|---------|----------|------|------------|
|---------|----------|------|------------|

9

5.80

9: (Time: 5.80)

2:MS ES+  
8.6e+007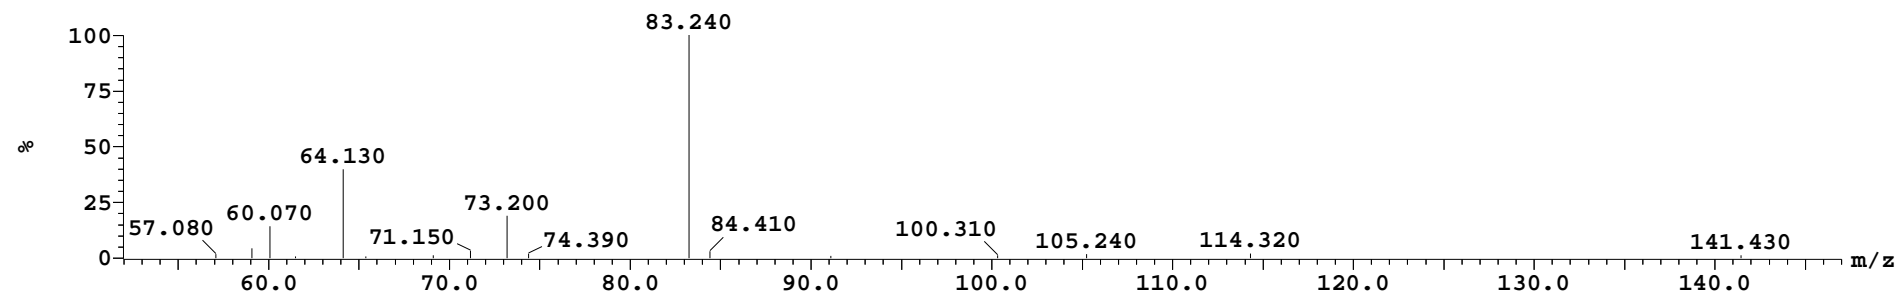

| Peak ID | Compound | Time | Mass Found |
|---------|----------|------|------------|
|---------|----------|------|------------|

10

6.00

10: (Time: 6.00)

2:MS ES+  
1.1e+007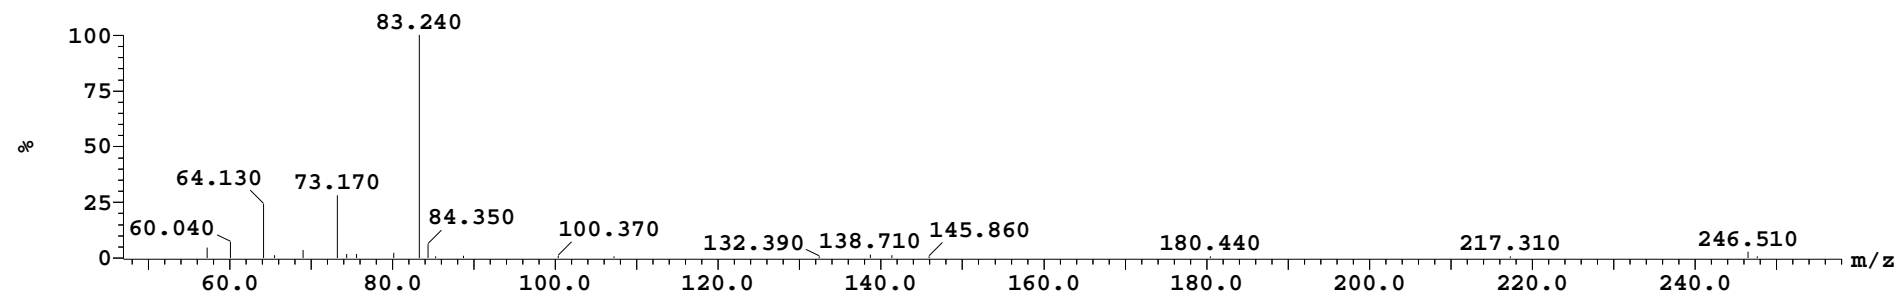



**Openlynx Report -**

Sample: 644

File:LK-3

Description:Default file

Vial:1:B,5

Date:03-Aug-2023

ID:

Time:13:20:09

Page 25

Printed: Thu Aug 03 15:05:46 2023

**Sample Report (continued):**

| Peak ID | Compound | Time | Mass Found |
|---------|----------|------|------------|
|---------|----------|------|------------|

|    |  |      |  |
|----|--|------|--|
| 11 |  | 8.02 |  |
|----|--|------|--|

11: (Time: 8.02)

2:MS ES+  
6.5e+006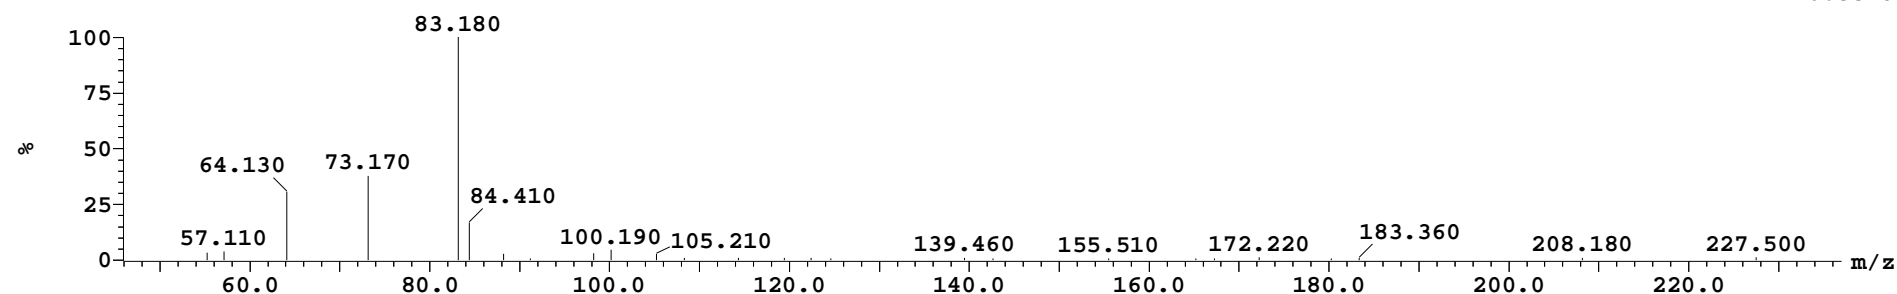

| Peak ID | Compound | Time | Mass Found |
|---------|----------|------|------------|
|---------|----------|------|------------|

|    |  |      |  |
|----|--|------|--|
| 12 |  | 8.63 |  |
|----|--|------|--|

12: (Time: 8.63)

2:MS ES+  
2.4e+006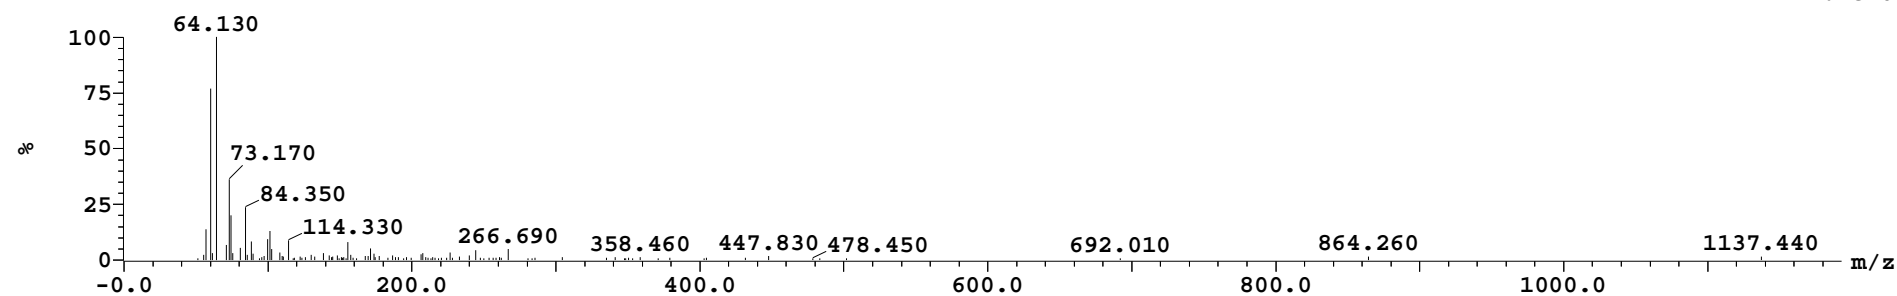

**Openlynx Report -**

Sample: 644

File: LK-3

Description: Default file

Vial: 1:B,5

Date: 03-Aug-2023

ID:

Time: 13:20:09

Page 26

Printed: Thu Aug 03 15:05:46 2023

**Sample Report (continued):**

| Peak ID | Compound | Time | Mass Found |
|---------|----------|------|------------|
|---------|----------|------|------------|

|    |  |      |  |
|----|--|------|--|
| 13 |  | 8.78 |  |
|----|--|------|--|

13: (Time: 8.78)

2:MS ES+  
4.6e+005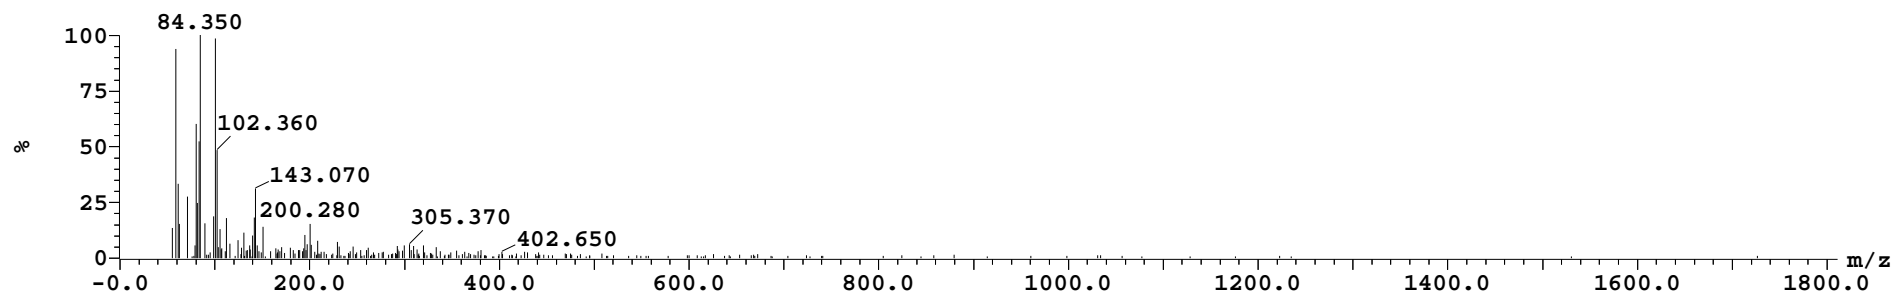

| Peak ID | Compound | Time | Mass Found |
|---------|----------|------|------------|
|---------|----------|------|------------|

|    |  |      |  |
|----|--|------|--|
| 14 |  | 9.15 |  |
|----|--|------|--|

14: (Time: 9.15)

2:MS ES+  
7.6e+005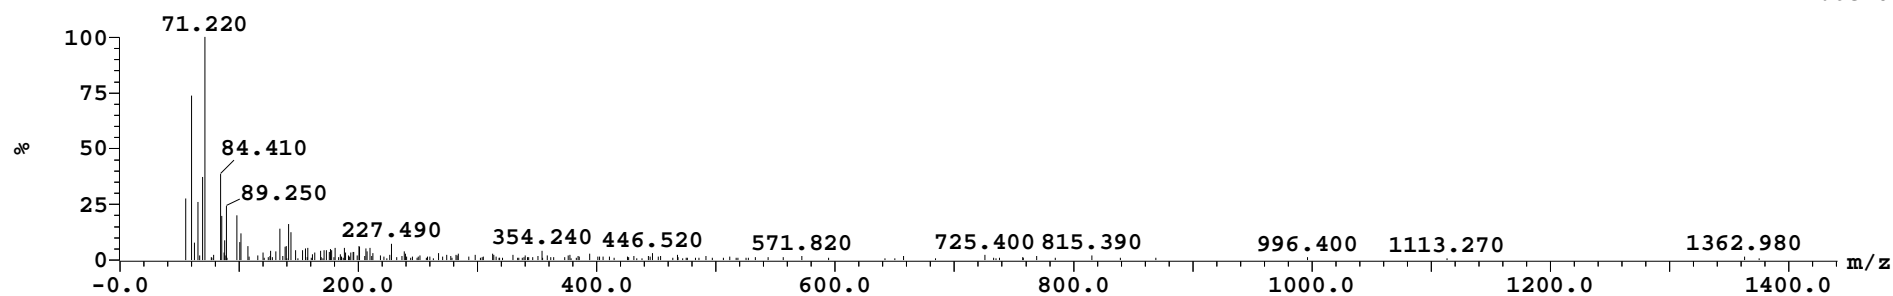

**Openlynx Report -**

Sample: 644

File:LK-3

Description:Default file

Vial:1:B,5

Date:03-Aug-2023

ID:

Time:13:20:09

Page 27

Printed: Thu Aug 03 15:05:46 2023

**Sample Report (continued):**

| Peak ID | Compound | Time | Mass Found |
|---------|----------|------|------------|
| 15      |          | 9.73 |            |

15:(Time: 9.73)

2:MS ES+  
3.1e+005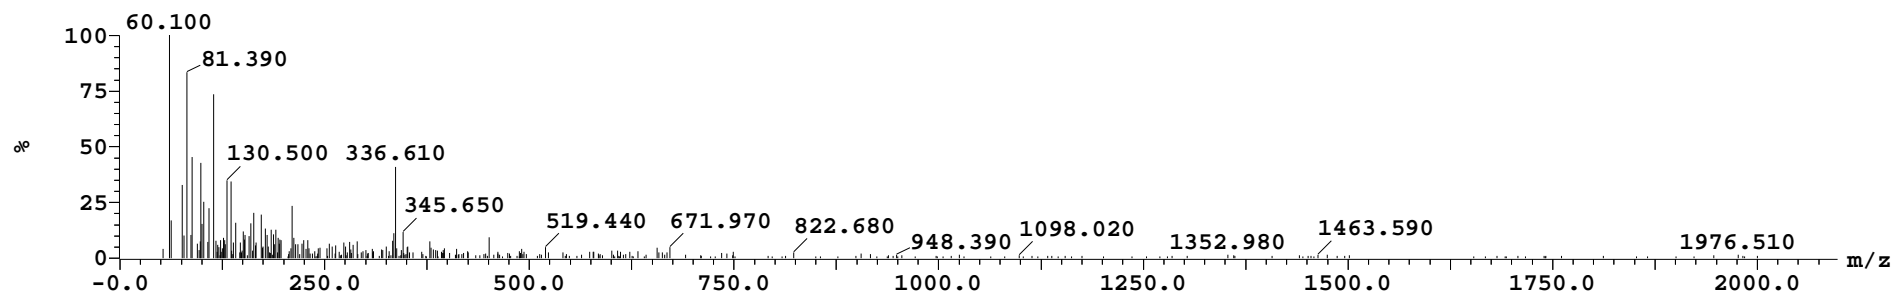

| Peak ID | Compound | Time | Mass Found |
|---------|----------|------|------------|
| 16      |          | 9.77 |            |

16:(Time: 9.77)

2:MS ES+  
3.0e+006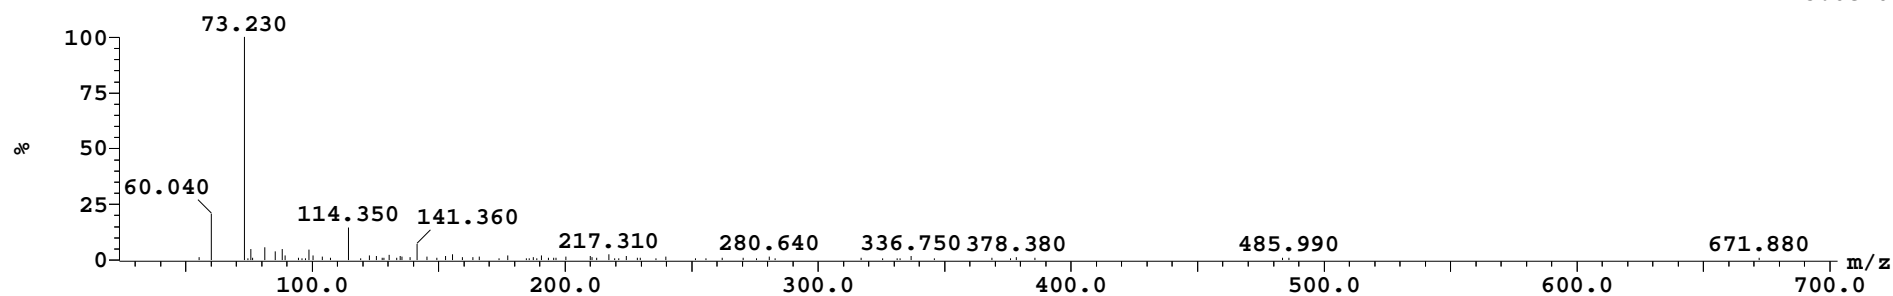

**Openlynx Report -**

Sample: 644

File:LK-3

Description:Default file

Vial:1:B,5

Date:03-Aug-2023

ID:

Time:13:20:09

Page 28

Printed: Thu Aug 03 15:05:46 2023

**Sample Report (continued):**

| Peak ID | Compound | Time | Mass Found |
|---------|----------|------|------------|
|---------|----------|------|------------|

|    |  |       |  |
|----|--|-------|--|
| 17 |  | 10.52 |  |
|----|--|-------|--|

17: (Time: 10.52)

2:MS ES+  
1.7e+006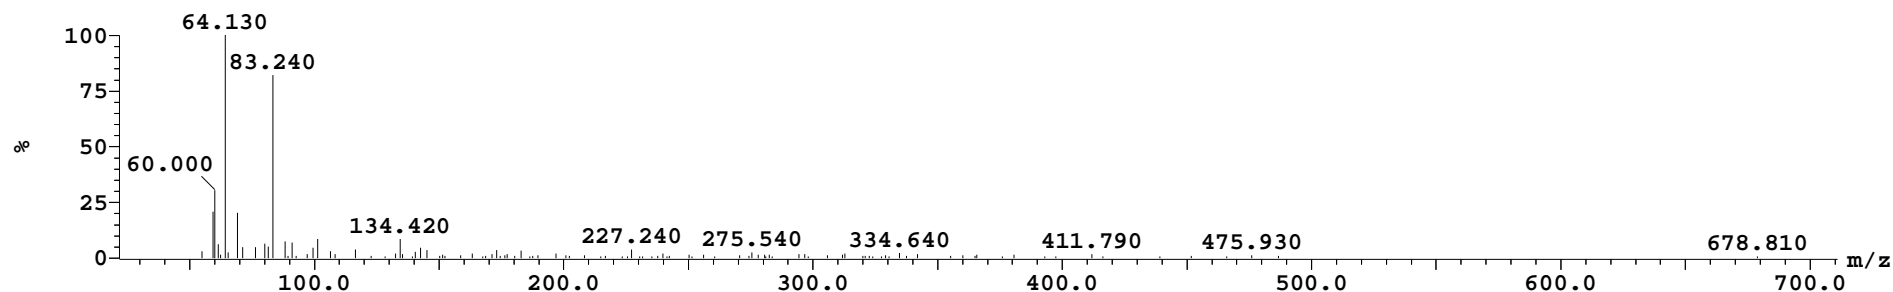

| Peak ID | Compound | Time | Mass Found |
|---------|----------|------|------------|
|---------|----------|------|------------|

|    |  |       |  |
|----|--|-------|--|
| 18 |  | 10.53 |  |
|----|--|-------|--|

18: (Time: 10.53)

2:MS ES+  
1.9e+006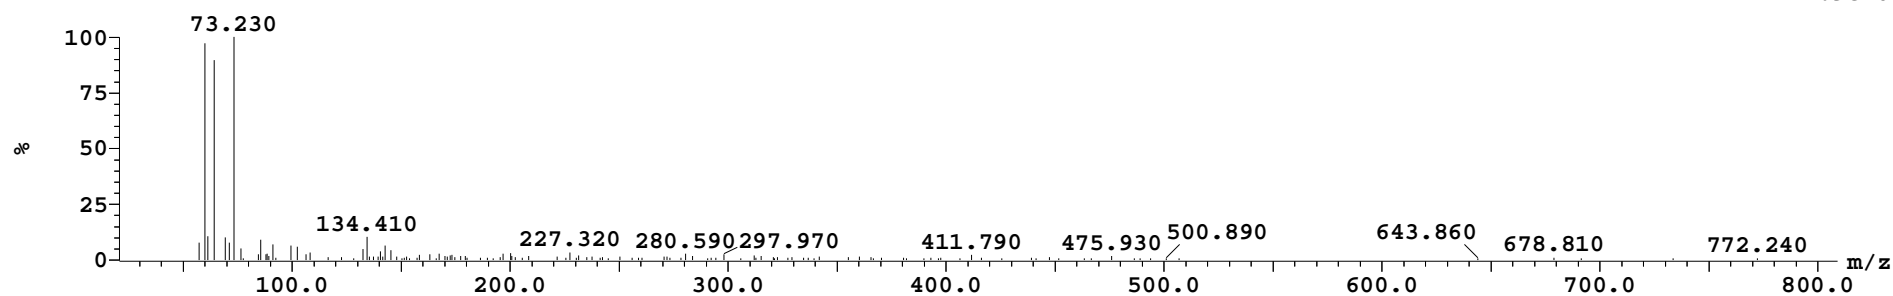

**Openlynx Report -**

Sample: 644

File:LK-3

Description:Default file

Vial:1:B,5

Date:03-Aug-2023

ID:

Time:13:20:09

Page 29

Printed: Thu Aug 03 15:05:46 2023

**Sample Report (continued):**

| Peak ID | Compound | Time | Mass Found |
|---------|----------|------|------------|
|---------|----------|------|------------|

|    |  |       |  |
|----|--|-------|--|
| 19 |  | 10.78 |  |
|----|--|-------|--|

19: (Time: 10.78)

2:MS ES+  
1.0e+006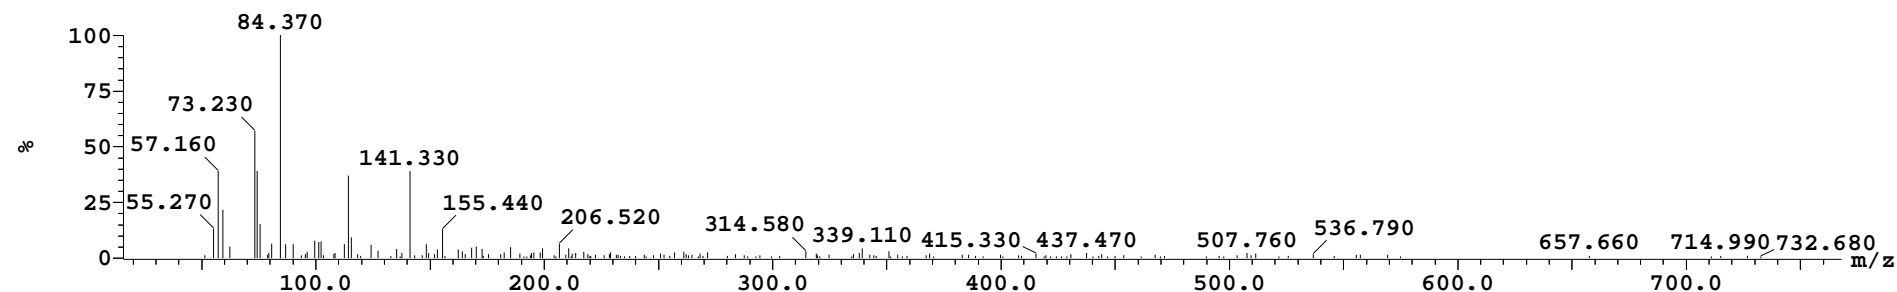

| Peak ID | Compound | Time | Mass Found |
|---------|----------|------|------------|
|---------|----------|------|------------|

|    |  |       |  |
|----|--|-------|--|
| 20 |  | 11.18 |  |
|----|--|-------|--|

20: (Time: 11.18)

2:MS ES+  
2.1e+006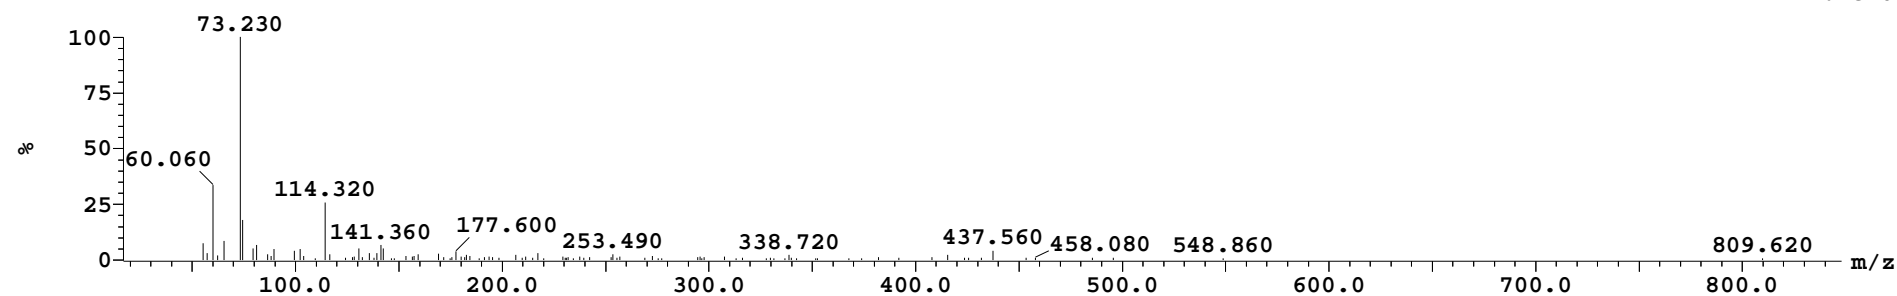

**Openlynx Report -**

Sample: 644

File:LK-3

Description:Default file

Vial:1:B,5

Date:03-Aug-2023

ID:

Time:13:20:09

Page 30

Printed: Thu Aug 03 15:05:46 2023

**Sample Report (continued):**

| Peak ID | Compound | Time | Mass Found |
|---------|----------|------|------------|
|---------|----------|------|------------|

|    |  |       |  |
|----|--|-------|--|
| 21 |  | 11.32 |  |
|----|--|-------|--|

21:(Time: 11.32)

2:MS ES+  
3.9e+006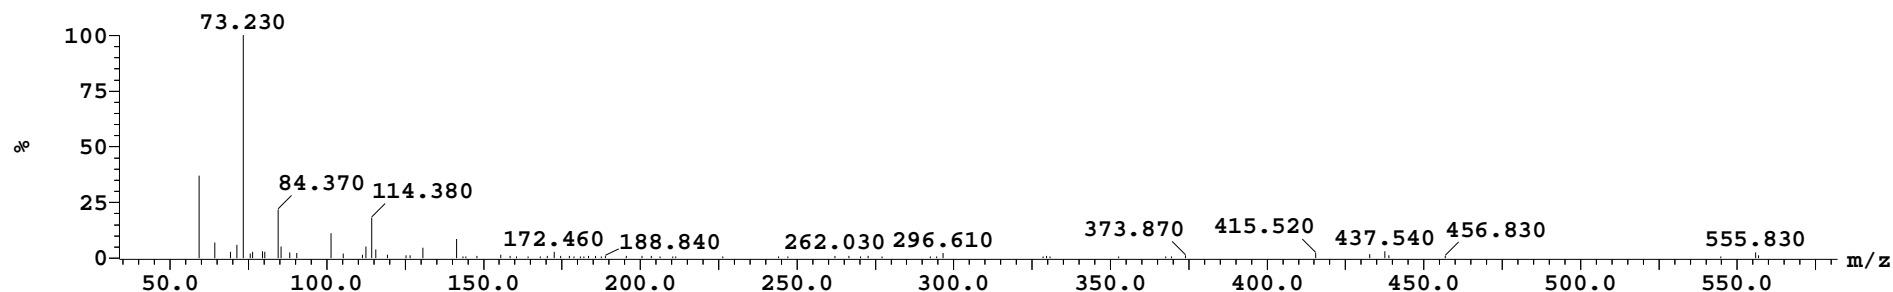

| Peak ID | Compound | Time | Mass Found |
|---------|----------|------|------------|
|---------|----------|------|------------|

|    |  |       |  |
|----|--|-------|--|
| 22 |  | 12.07 |  |
|----|--|-------|--|

22:(Time: 12.07)

2:MS ES+  
7.6e+006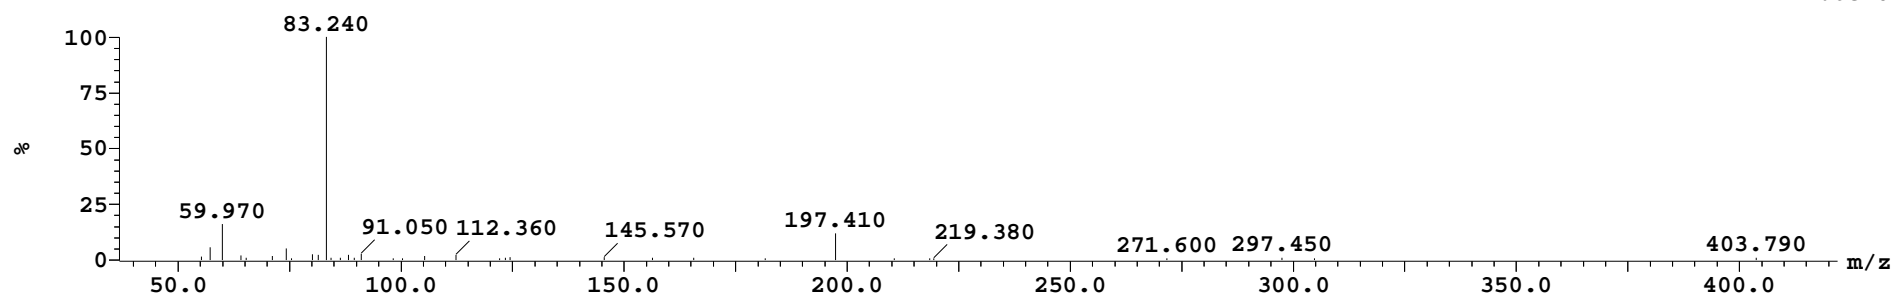

**Openlynx Report -**

Sample: 644

File:LK-3

Description:Default file

Vial:1:B,5

Date:03-Aug-2023

ID:

Time:13:20:09

Page 31

Printed: Thu Aug 03 15:05:46 2023

**Sample Report (continued):**

| Peak ID | Compound | Time | Mass Found |
|---------|----------|------|------------|
|---------|----------|------|------------|

|    |  |       |  |
|----|--|-------|--|
| 23 |  | 12.08 |  |
|----|--|-------|--|

23:(Time: 12.08)

2:MS ES+  
5.9e+006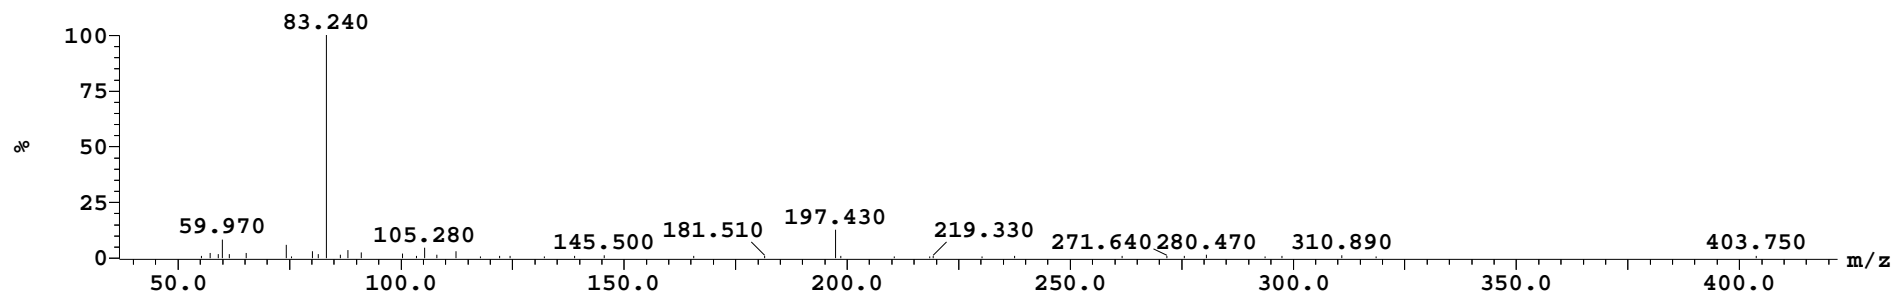

| Peak ID | Compound | Time | Mass Found |
|---------|----------|------|------------|
|---------|----------|------|------------|

|    |  |       |  |
|----|--|-------|--|
| 24 |  | 13.07 |  |
|----|--|-------|--|

24:(Time: 13.07)

2:MS ES+  
2.6e+006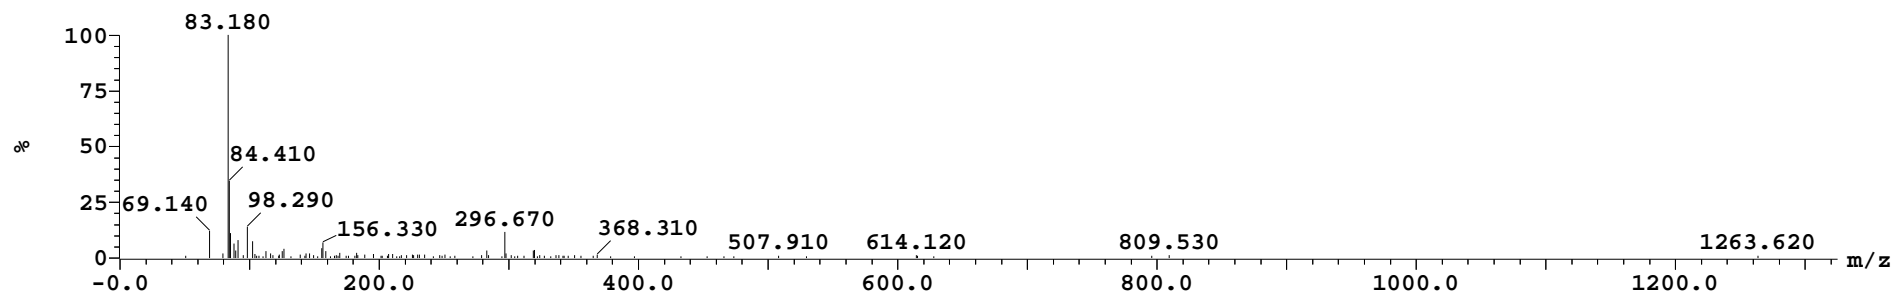

**Openlynx Report -**

Sample: 644

File:LK-3

Description:Default file

Vial:1:B,5

Date:03-Aug-2023

ID:

Time:13:20:09

Page 32

Printed: Thu Aug 03 15:05:46 2023

**Sample Report (continued):**

| Peak ID | Compound | Time  | Mass Found |
|---------|----------|-------|------------|
| 25      |          | 13.13 |            |

25:(Time: 13.13)

2:MS ES+  
6.2e+006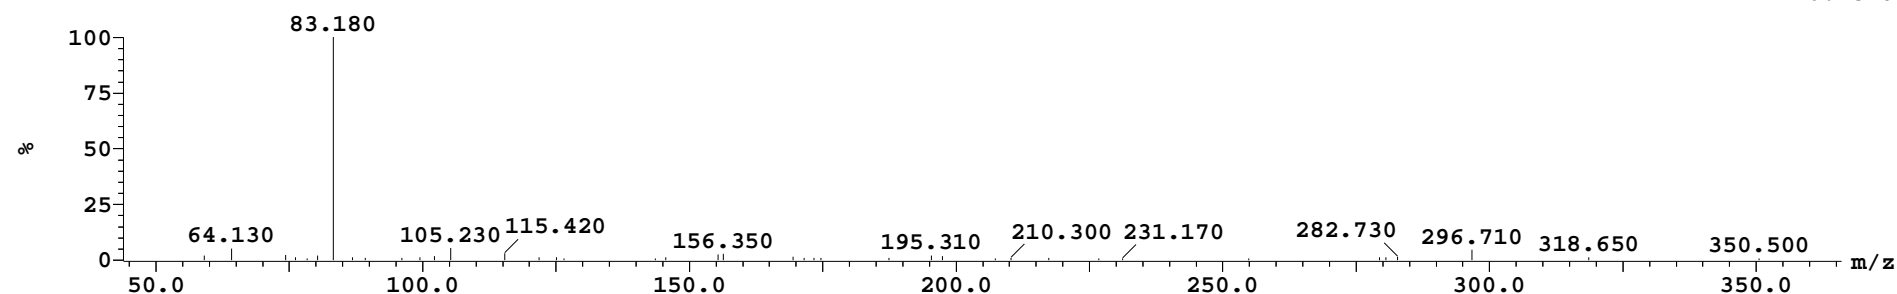

| Peak ID | Compound | Time  | Mass Found |
|---------|----------|-------|------------|
| 26      |          | 14.30 |            |

26:(Time: 14.30)

2:MS ES+  
6.9e+005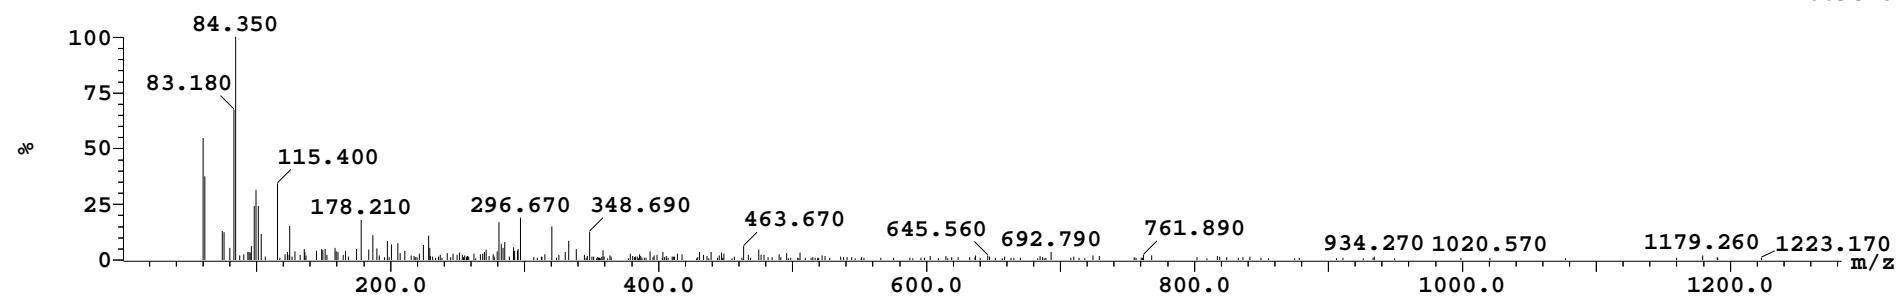



**Openlynx Report -**

Sample: 644

File:LK-3

Description:Default file

Vial:1:B,5

Date:03-Aug-2023

ID:

Time:13:20:09

Page 33

Printed: Thu Aug 03 15:05:46 2023

**Sample Report (continued):**

| Peak ID | Compound | Time | Mass Found |
|---------|----------|------|------------|
|---------|----------|------|------------|

|    |  |       |  |
|----|--|-------|--|
| 27 |  | 14.68 |  |
|----|--|-------|--|

27:(Time: 14.68)

2:MS ES+  
7.3e+006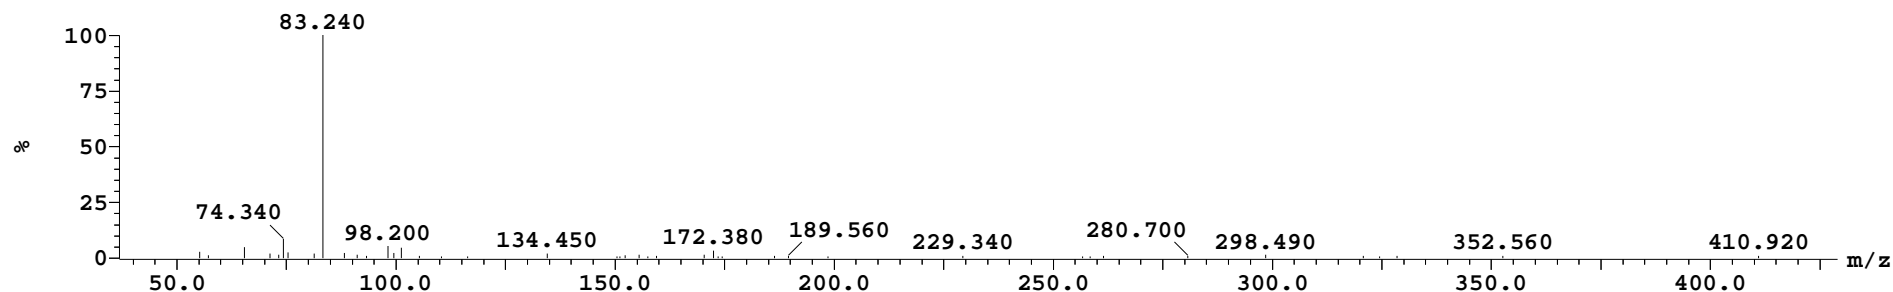

| Peak ID | Compound | Time | Mass Found |
|---------|----------|------|------------|
|---------|----------|------|------------|

|    |  |       |  |
|----|--|-------|--|
| 28 |  | 15.80 |  |
|----|--|-------|--|

28:(Time: 15.80)

2:MS ES+  
2.9e+006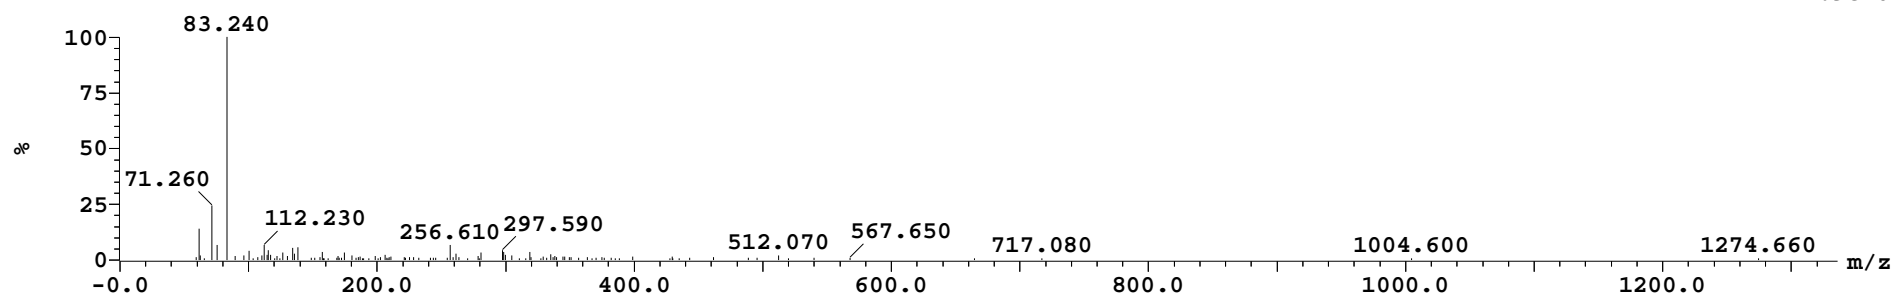

**Openlynx Report -**

Sample: 644

File:LK-3

Description:Default file

Vial:1:B,5

Date:03-Aug-2023

ID:

Time:13:20:09

Page 34

Printed: Thu Aug 03 15:05:46 2023

**Sample Report (continued):**

| Peak ID | Compound | Time | Mass Found |
|---------|----------|------|------------|
|---------|----------|------|------------|

|    |  |       |  |
|----|--|-------|--|
| 29 |  | 16.28 |  |
|----|--|-------|--|

29:(Time: 16.28)

2:MS ES+  
2.0e+007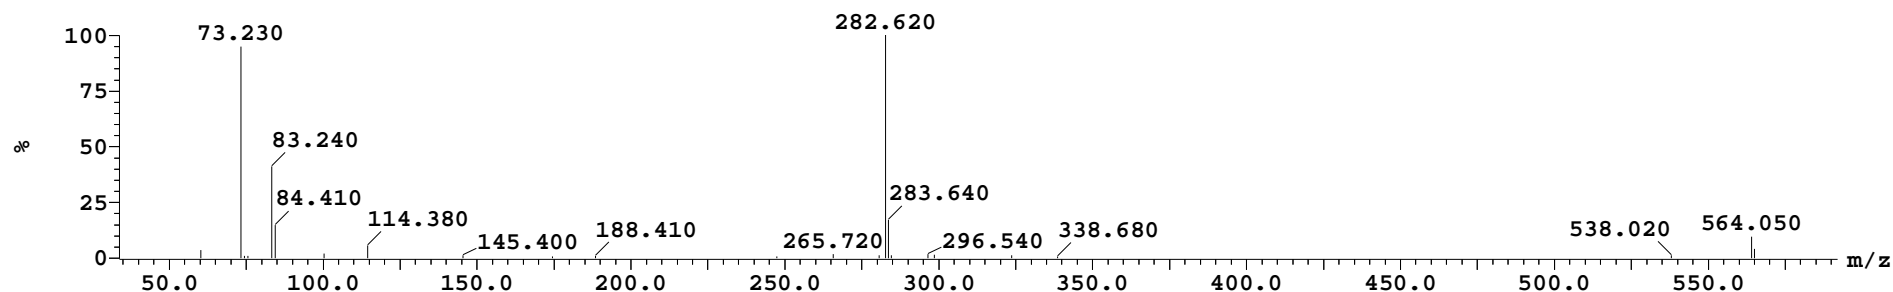

| Peak ID | Compound | Time | Mass Found |
|---------|----------|------|------------|
|---------|----------|------|------------|

|    |  |       |  |
|----|--|-------|--|
| 30 |  | 16.58 |  |
|----|--|-------|--|

30:(Time: 16.58)

2:MS ES+  
6.6e+007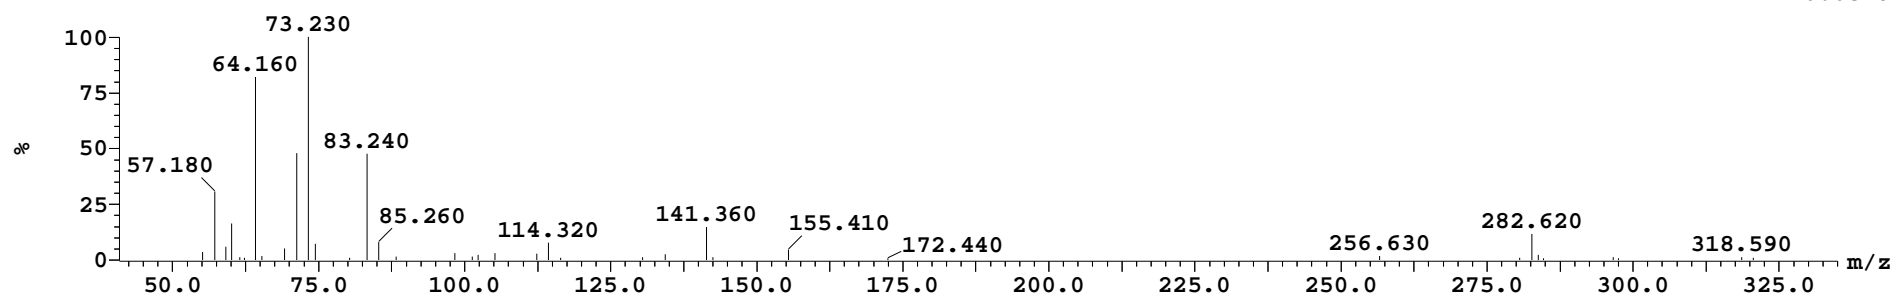

**Openlynx Report -**

Sample: 644

File:LK-3

Description:Default file

Vial:1:B,5

Date:03-Aug-2023

ID:

Time:13:20:09

Page 35

Printed: Thu Aug 03 15:05:46 2023

**Sample Report (continued):**

| Peak ID | Compound | Time  | Mass Found |
|---------|----------|-------|------------|
| 31      |          | 16.88 |            |

31:(Time: 16.88)

2:MS ES+  
1.6e+007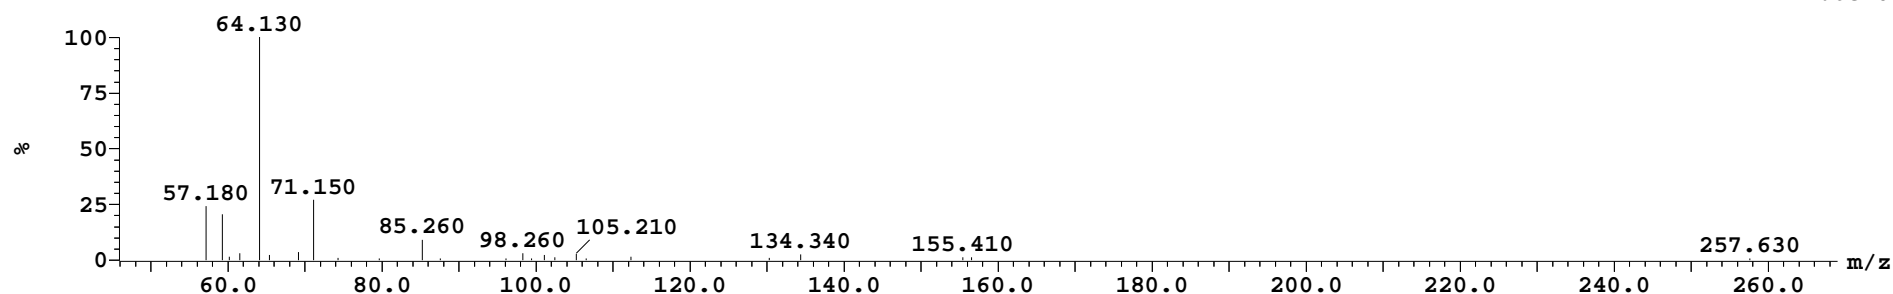

| Peak ID | Compound | Time  | Mass Found |
|---------|----------|-------|------------|
| 32      |          | 17.27 |            |

32:(Time: 17.27)

2:MS ES+  
9.4e+007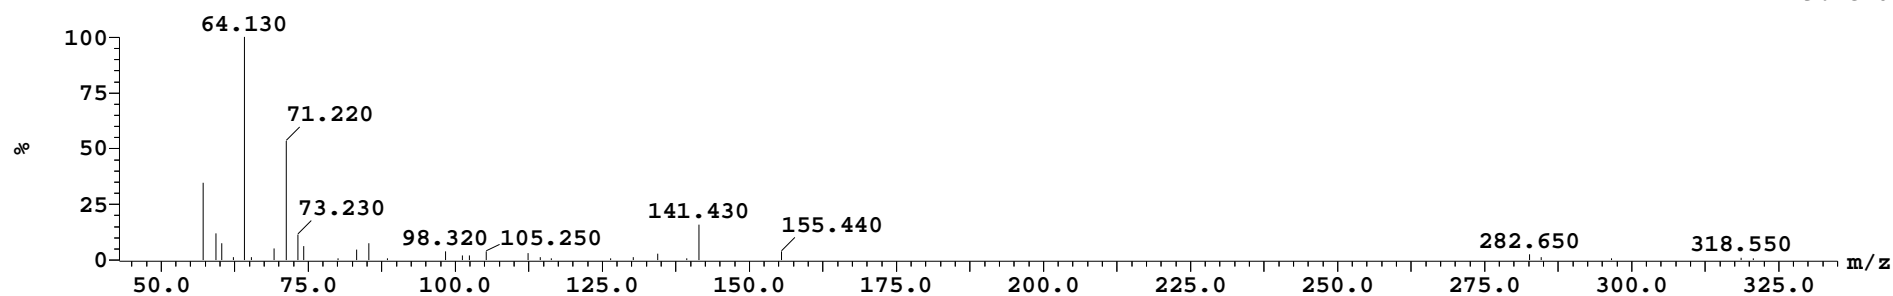

Openlynx Report -

Sample: 644  
File:LK-3  
Description:Default file

Vial:1:B,5  
Date:03-Aug-2023

ID:  
Time:13:20:09

Printed: Thu Aug 03 15:05:46 2023

Sample Report (continued):

| Peak ID | Compound | Time | Mass Found |
|---------|----------|------|------------|
|---------|----------|------|------------|

33: (Time: 17.40)

2:MS ES+  
8.8e+006

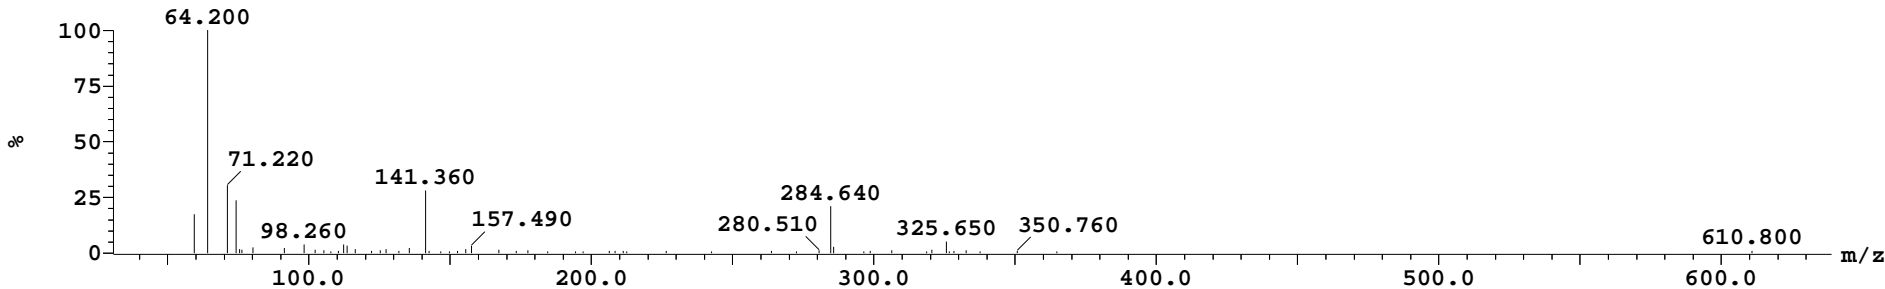

Supplement: s1 [file s1]
